# Supplementary material for: Forensic Tools for Species Identification of Skeletal Remains: Metrics, Statistics, and OsteoID
Source: Biology (Basel). 2021 Dec 25;11(1):25. doi: 10.3390/biology11010025 (PMC8773354; doi:10.3390/biology11010025)
Supplement: Supplementary file 1 [file biology-11-00025-s001.zip › Table S12 Discriminant Functions Garvin OsteoID PW Cell Protected.xlsx]

## Sheet: TableS12_DiscFxns
	Table S12. Select Discriminant Functions for Human versus Nonhuman Classification.								If you enter your measurements below in the open cells, it will calculate the discriminant function score and assign classification. Please check for errors.
	Bone	N	Resultant Function	Human if >	Acc	H_Acc	NH_Acc		MaxL	MaxPW	MaxDD	MaxDW	MidMaxD	MidMinD		MaxL_Co	MaxPW_Co	MaxDD_Co	MaxDW_Co	MidMaxD_Co	MidMinD_Co	C		DF_Score	Classification
	ALL Pooled	2745; NH=2655; H=90	MaxL(.017) + MaxDD(-.022) + MaxDW(.080) + MidMaxD(-.092) + MidMinD(-.157) - 1.322	1.5875	0.948	0.9	0.95			X						0.017	0	-0.022	0.08	-0.092	-0.157	-1.322
	ALL Pooled	4496; NH=3088; H=1408;	MaxL(.021) + MidMaxD(-.072) + MidMinD(-0.092) – 1.984	0.4425	0.903	0.956	0.879			X	X	X				0.021	0	0	0	-0.072	-0.092	-1.984
	ALL Pooled	8670; NH=3856; H=4814	MaxL(.013) + MaxDW(-.009) – 3.299	-0.129	0.896	0.946	0.834			X	X		X	X		0.013	0	0	-0.009	0	0	-3.299
	Pooled Distal Segment	3237; NH=3007; H=230	MaxDD(-.077) + MaxDW(.103) – 1.257	0.409	0.789	0.643	0.8		X	X			X	X		0	0	-0.077	0.103	0	0	-1.257
	Pooled Midshaft	4856; NH=3089; H=1767	MidMaxD(-.178) + MidMinD(.290) – 1.015	0.0825	0.644	0.49	0.731		X	X	X	X				0	0	0	0	-0.178	0.29	-1.015
	Hum	1099; NH=715; H=384	MaxL(.036) + MidMinD(-.260) – 3.315	1.038	0.995	1	0.992			X	X	X	X			0.036	0	0	0	0	-0.26	-3.315
	Hum	2753; NH=891; H=1862	MaxL(.043) + MaxDW(-.118) – 5.139	-0.639	0.967	0.996	0.907			X	X		X	X		0.043	0	0	-0.118	0	0	-5.139
	Hum	976; NH=714; H=262	MaxL(.033) + MaxPW(-.049) + MaxDW(.035) + MidMaxD(.042) + MidMinD(-.253) – 3.083	1.2045	0.983	1	0.976				X					0.033	-0.049	0	0.035	0.042	-0.253	-3.083
	HumerusMid	1061; NH=714 H=347	MidMaxD(-.163) + MidMinD(.302) – 1.451	0.067	0.671	0.62	0.696		X	X	X	X				0	0	0	0	-0.163	0.302	-1.451
	Humerus Distal	876; NH=850; H=26	MaxDD(-.150) + MaxDW(.151) – 1.294	1.643	0.963	1	0.962		X	X			X	X		0	0	-0.15	0.151	0	0	-1.294
	Fem	3458; NH=906; H=2552	MaxL(.035) + MaxDW(-.106) – 5.834	-1.112	0.981	0.999	0.93			X	X		X	X		0.035	0	0	-0.106	0	0	-5.834
	Fem	1103; NH=711; H=392	MaxL(.028) + MaxDW(-.026) + MidMaxD(-.331) + MidMinD(.221) -3.691	0.9115	0.997	1	0.996			X	X					0.028	0	0	-0.026	-0.331	0.221	-3.691
	Femur Distal	753; NH=720; H=33	MaxDD(-.134) + MaxDW(.177) – 1.351	1.894	0.961	0.97	0.961		X	X			X	X		0	0	-0.134	0.177	0	0	-1.351
	Femur Midshaft	1168; NH=711; H=457	MidMaxD(-.400) + MidMinD(.542) – 1.952	0.29	0.902	0.864	0.927		X	X	X	X				0	0	0	0	-0.4	0.542	-1.952
	Radius	948; NH=442; H=247	MaxL(.029) + MaxPW(-.098) – 3.051	0.425	0.914	1	0.868				X	X	X	X		0.029	-0.098	0	0	0	0	-3.051
	Radius Midshaft	879; NH=443; H=436	MidMaxD(-.278) + MidMinD(.622) – 2.214	0.007	0.879	0.883	0.876		X	X	X	X				0	0	0	0	-0.278	0.622	-2.214
	Radius Distal	537; NH=448; H=89	MaxDD(.387) + MaxDW(-.226) - 0.603	0.597	0.864	0.82	0.873		X	X			X	X		0	0	0.387	-0.226	0	0	-0.603
	Tibia	551; NH=621; H=327	MaxL(.018) + MidMaxD(.217) + MidMinD(-.442) – 1.250	1.39	0.931	1	0.929			X	X	X				0.018	0	0	0	0.217	-0.442	-1.25
	Tibia	2580; NH=807; H=1773	MaxL(.024) + MaxPW(-.061) – 2.916	0.4065	0.894	0.922	0.834				X	X	X	X		0.024	-0.061	0	0	0	0	-2.916
	Tibia Distal	817; NH=735; H=82	MaxDD(.194) + MaxDW(-.096) – 1.449	0.646	0.862	0.927	0.854		X	X			X	X		0	0	0.194	-0.096	0	0	-1.449
	Tibia Midshaft	603; NH=537; H=66	MidMaxD(.421) + MidMinD(-.481) - 0.732	0.671	0.872	0.848	0.875		X	X	X	X				0	0	0	0	0.421	-0.481	-0.732
	Ulna	420; NH=166; H=254	MaxL(.026) + MaxPW(-.198) + MidMaxD(-.179) + MidMinD(.499) – 4.515	-0.241	0.874	0.937	0.777				X	X				0.026	-0.198	0	0	-0.179	0.499	-4.515
	Ulna Midshaft	889; NH=428; H=461	MidMaxD(-.105) + MidMinD(.419) – 2.779	-0.039	0.9	0.944	0.853		X	X	X	X				0	0	0	0	-0.105	0.419	-2.779
