# Supplementary material for: Forensic Tools for Species Identification of Skeletal Remains: Metrics, Statistics, and OsteoID
Source: Biology (Basel). 2021 Dec 25;11(1):25. doi: 10.3390/biology11010025 (PMC8773354; doi:10.3390/biology11010025)
Supplement: Supplementary file 1 [file biology-11-00025-s001.zip › Tables S1-S11 Descriptive Stats Garvin OsteoID.xlsx]

## Sheet: ReadMe
This excel file contains Supplementary Tables S1-S11 associated with
Garvin et al. 2021. Forensic approaches to species identification of skeletal re-mains: metrics, statistics, and OsteoID. Biology 2021.
OsteoID (www.boneidentification.com)
Tables S1-S11 present descriptive statistics (by species) for the measurements collected as part of this project.
This includes the following statistics/abbreviations:
	Count	sampel size
	Min	minimum value
	Max	maximum value
	Ave	average value
	SD	standard deviation
	SD2-	Negative two standard deviations from the mean
	SD2+	Positive two standard deviations from the mean
	Web_Min	Value used as the minimum for the OsteoID search range with the web tool; this was either the minimum value or the negative two standard deviations from the mean, whichever was less
	Web_Max	value used as the maximum for the OsteoID search range with the web tool; this was either the maximum value or the positive two standard deviations from the mean, whichever was more
Measurements include:
	MaxL	maximum length of the bone
	MaxPD	maximum depth (antero-posterior) of the proximal end/epiphysis
	MaxPW	maximum width (medio-lateral) of the proximal end/epiphysis
	MaxDD	maximum depth (antero-posterior) of the distal end/epiphysis
	MaxDW	maximum width (medio-lateral) of the distal end/epiphysis
	MidMax	maximum diameter at midshaft
	MidMin	minimum diameter at midshaft
	Fem_FHD	femoral head diameter (femur only)
	OsCx_AcBr	acetabular breadth of os coxae (os coxae only)

## Sheet: TableS1_Humerus
Table S1. Descriptive statistics for humeral measurements collected by species.
Class	Genus	Species	Common_Name	Bone	Measurement	Variable	Count	Min	Max	Ave	SD	SD2-	SD2+		Web_Min	Web_Max
Mammal	Alces	alces	Moose	Humerus	MaxL	Hum_MaxL	19	268	425	366.895	44.1851	278.525	455.265		268	455.265
Mammal	Alces	alces	Moose	Humerus	MaxPD	Hum_MaxPD	18	83	138.75	113.472	15.0298	83.4121	143.531		83	143.531
Mammal	Alces	alces	Moose	Humerus	MaxPW	Hum_MaxPW	18	66	118	96.9317	14.8749	67.1819	126.681		66	126.681
Mammal	Alces	alces	Moose	Humerus	MaxDD	Hum_MaxDD	18	65	94	79.2839	8.37495	62.534	96.0338		62.534	96.0338
Mammal	Alces	alces	Moose	Humerus	MaxDW	Hum_MaxDW	18	68	92	83.2322	7.67711	67.878	98.5864		67.878	98.5864
Mammal	Alces	alces	Moose	Humerus	MidMax	Hum_MidMax	17	28.45	62.2	46.7665	9.59205	27.5824	65.9506		27.5824	65.9506
Mammal	Alces	alces	Moose	Humerus	MidMin	Hum_MidMin	18	21.16	57.57	37.8672	8.56026	20.7467	54.9877		20.7467	57.57
Mammal	Anas	platyrhynchos	Mallard Duck	Humerus	MaxL	Hum_MaxL	31	87	113	95.0323	7.00706	81.0181	109.046		81.0181	113
Mammal	Anas	platyrhynchos	Mallard Duck	Humerus	MaxPD	Hum_MaxPD	31	10	17	12.5484	1.68994	9.1685	15.9283		9.1685	17
Mammal	Anas	platyrhynchos	Mallard Duck	Humerus	MaxPW	Hum_MaxPW	31	20	31	22.129	2.74156	16.6459	27.6121		16.6459	31
Mammal	Anas	platyrhynchos	Mallard Duck	Humerus	MaxDD	Hum_MaxDD	31	8	14	9.19355	1.57944	6.03467	12.3524		6.03467	14
Mammal	Anas	platyrhynchos	Mallard Duck	Humerus	MaxDW	Hum_MaxDW	31	14	21	15.5161	1.67075	12.1746	18.8576		12.1746	21
Mammal	Anas	platyrhynchos	Mallard Duck	Humerus	MidMax	Hum_MidMax	31	6.73	10.2	7.67871	0.74089	6.19693	9.16049		6.19693	10.2
Mammal	Anas	platyrhynchos	Mallard Duck	Humerus	MidMin	Hum_MidMin	31	5.77	8.54	6.52355	0.618706	5.28614	7.76096		5.28614	8.54
Mammal	Bos	taurus	Cow	Humerus	MaxL	Hum_MaxL	15	248	391	327.467	42.693	242.081	412.853		242.081	412.853
Mammal	Bos	taurus	Cow	Humerus	MaxPD	Hum_MaxPD	14	79	161	118.786	20.7668	77.2522	160.319		77.2522	161
Mammal	Bos	taurus	Cow	Humerus	MaxPW	Hum_MaxPW	14	76	159	118.143	21.7958	74.5513	161.734		74.5513	161.734
Mammal	Bos	taurus	Cow	Humerus	MaxDD	Hum_MaxDD	14	55	106	86.2143	14.6402	56.9339	115.495		55	115.495
Mammal	Bos	taurus	Cow	Humerus	MaxDW	Hum_MaxDW	14	61	126	98.7857	17.958	62.8698	134.702		61	134.702
Mammal	Bos	taurus	Cow	Humerus	MidMax	Hum_MidMax	10	38.7	94.54	69.091	19.5675	29.9559	108.226		29.9559	108.226
Mammal	Bos	taurus	Cow	Humerus	MidMin	Hum_MidMin	10	28.02	60.63	47.625	11.115	25.395	69.855		25.395	69.855
Mammal	Branta	canadensis	Canadian Goose	Humerus	MaxL	Hum_MaxL	31	120	190	149.806	23.5038	102.799	196.814		102.799	196.814
Mammal	Branta	canadensis	Canadian Goose	Humerus	MaxPD	Hum_MaxPD	34	13	26	18	3.42008	11.1598	24.8402		11.1598	26
Mammal	Branta	canadensis	Canadian Goose	Humerus	MaxPW	Hum_MaxPW	34	23	40	31.5	5.04675	21.4065	41.5935		21.4065	41.5935
Mammal	Branta	canadensis	Canadian Goose	Humerus	MaxDD	Hum_MaxDD	31	9	17	12.871	2.27658	8.31782	17.4241		8.31782	17.4241
Mammal	Branta	canadensis	Canadian Goose	Humerus	MaxDW	Hum_MaxDW	31	9	28	21.4194	4.10507	13.2092	29.6295		9	29.6295
Mammal	Branta	canadensis	Canadian Goose	Humerus	MidMax	Hum_MidMax	31	7.79	13.23	10.1277	1.61194	6.90386	13.3516		6.90386	13.3516
Mammal	Branta	canadensis	Canadian Goose	Humerus	MidMin	Hum_MidMin	31	6.74	12.01	9.15742	1.57417	6.00908	12.3058		6.00908	12.3058
Mammal	Canis	familiaris	Dog	Humerus	MaxL	Hum_MaxL	84	60	268	148.646	47.3479	53.9507	243.342		53.9507	268
Mammal	Canis	familiaris	Dog	Humerus	MaxPD	Hum_MaxPD	74	16	59	35.9526	11.0791	13.7944	58.1107		13.7944	59
Mammal	Canis	familiaris	Dog	Humerus	MaxPW	Hum_MaxPW	41	10	48	29.342	9.64289	10.0562	48.6277		10	48.6277
Mammal	Canis	familiaris	Dog	Humerus	MaxDD	Hum_MaxDD	42	8.96	40	25.344	8.07468	9.19469	41.4934		8.96	41.4934
Mammal	Canis	familiaris	Dog	Humerus	MaxDW	Hum_MaxDW	83	14.33	52	31.7605	9.33864	13.0832	50.4378		13.0832	52
Mammal	Canis	familiaris	Dog	Humerus	MidMax	Hum_MidMax	41	5.53	28.69	16.9049	6.01547	4.87394	28.9358		4.87394	28.9358
Mammal	Canis	familiaris	Dog	Humerus	MidMin	Hum_MidMin	41	4.25	21.03	12.6071	4.30319	4.0007	21.2134		4.0007	21.2134
Mammal	Canis	latrans	Coyote	Humerus	MaxL	Hum_MaxL	64	134	182.3	157.586	10.6842	136.217	178.954		134	182.3
Mammal	Canis	latrans	Coyote	Humerus	MaxPD	Hum_MaxPD	27	20	37	26.3704	3.97248	18.4254	34.3153		18.4254	37
Mammal	Canis	latrans	Coyote	Humerus	MaxPW	Hum_MaxPW	27	25	40	33.8148	3.58455	26.6457	40.9839		25	40.9839
Mammal	Canis	latrans	Coyote	Humerus	MaxDD	Hum_MaxDD	27	19	28	22.7407	2.17667	18.3874	27.0941		18.3874	28
Mammal	Canis	latrans	Coyote	Humerus	MaxDW	Hum_MaxDW	56	24	33	28.542	2.06975	24.4025	32.6815		24	33
Mammal	Canis	latrans	Coyote	Humerus	MidMax	Hum_MidMax	27	9.4	15.72	13.25	1.58948	10.071	16.429		9.4	16.429
Mammal	Canis	latrans	Coyote	Humerus	MidMin	Hum_MidMin	27	8.48	13.64	10.7548	1.14046	8.4739	13.0357		8.4739	13.64
Mammal	Canis	lupus	Wolf	Humerus	MaxL	Hum_MaxL	44	163.46	267.86	206.461	25.1042	156.253	256.67		156.253	267.86
Mammal	Canis	lupus	Wolf	Humerus	MaxPD	Hum_MaxPD	28	30.1	47.21	37.4975	4.60447	28.2886	46.7064		28.2886	47.21
Mammal	Canis	lupus	Wolf	Humerus	MaxPW	Hum_MaxPW	28	33.66	62.21	48.0825	5.00169	38.0791	58.0859		33.66	62.21
Mammal	Canis	lupus	Wolf	Humerus	MaxDD	Hum_MaxDD	28	28.36	38.84	32.2204	2.61293	26.9945	37.4462		26.9945	38.84
Mammal	Canis	lupus	Wolf	Humerus	MaxDW	Hum_MaxDW	37	32.16	55.16	41.5005	4.54025	32.42	50.581		32.16	55.16
Mammal	Canis	lupus	Wolf	Humerus	MidMax	Hum_MidMax	28	16.11	24.09	19.5957	2.14092	15.3139	23.8775		15.3139	24.09
Mammal	Canis	lupus	Wolf	Humerus	MidMin	Hum_MidMin	28	12.33	17.67	15.3257	1.14271	13.0403	17.6111		12.33	17.67
Mammal	Cervus	canadensis/elaphus	Elk	Humerus	MaxL	Hum_MaxL	34	273	355	323.206	19.8032	283.599	362.812		273	362.812
Mammal	Cervus	canadensis/elaphus	Elk	Humerus	MaxPD	Hum_MaxPD	33	79	116	99.2121	8.66299	81.8861	116.538		79	116.538
Mammal	Cervus	canadensis/elaphus	Elk	Humerus	MaxPW	Hum_MaxPW	34	69	109	93.4118	8.62385	76.1641	110.659		69	110.659
Mammal	Cervus	canadensis/elaphus	Elk	Humerus	MaxDD	Hum_MaxDD	34	50	110	66.6176	9.17842	48.2608	84.9745		48.2608	110
Mammal	Cervus	canadensis/elaphus	Elk	Humerus	MaxDW	Hum_MaxDW	34	55	86	71.1471	6.05096	59.0451	83.249		55	86
Mammal	Cervus	canadensis/elaphus	Elk	Humerus	MidMax	Hum_MidMax	34	37.74	80	46.0471	7.44069	31.1657	60.9284		31.1657	80
Mammal	Cervus	canadensis/elaphus	Elk	Humerus	MidMin	Hum_MidMin	34	29.38	47.85	35.0485	3.96012	27.1283	42.9688		27.1283	47.85
Mammal	Didelphis	virginiana	Opossum	Humerus	MaxL	Hum_MaxL	34	55	79	67.4118	5.79507	55.8216	79.0019		55	79.0019
Mammal	Didelphis	virginiana	Opossum	Humerus	MaxPD	Hum_MaxPD	33	12	20	14.9409	1.93558	11.0697	18.8121		11.0697	20
Mammal	Didelphis	virginiana	Opossum	Humerus	MaxPW	Hum_MaxPW	33	11	16	13.4364	1.42167	10.593	16.2797		10.593	16.2797
Mammal	Didelphis	virginiana	Opossum	Humerus	MaxDD	Hum_MaxDD	33	4	8	6.14667	0.968177	4.21031	8.08302		4	8.08302
Mammal	Didelphis	virginiana	Opossum	Humerus	MaxDW	Hum_MaxDW	33	16	25	19.6818	2.1788	15.3242	24.0394		15.3242	25
Mammal	Didelphis	virginiana	Opossum	Humerus	MidMax	Hum_MidMax	33	6.51	11.96	9.12636	1.39688	6.3326	11.9201		6.3326	11.96
Mammal	Didelphis	virginiana	Opossum	Humerus	MidMin	Hum_MidMin	33	4	6.57	5.25879	0.719526	3.81974	6.69784		3.81974	6.69784
Mammal	Equus	ferus/caballus	Horse	Humerus	MaxL	Hum_MaxL	31	228	419	322.903	40.0644	242.774	403.032		228	419
Mammal	Equus	ferus/caballus	Horse	Humerus	MaxPD	Hum_MaxPD	30	75	134	108.1	12.9518	82.1965	134.004		75	134.004
Mammal	Equus	ferus/caballus	Horse	Humerus	MaxPW	Hum_MaxPW	30	74	137	103.733	15.5229	72.6875	134.779		72.6875	137
Mammal	Equus	ferus/caballus	Horse	Humerus	MaxDD	Hum_MaxDD	30	62	116	88	12.6763	62.6473	113.353		62	116
Mammal	Equus	ferus/caballus	Horse	Humerus	MaxDW	Hum_MaxDW	30	65	119	90.8667	12.878	65.1106	116.623		65	119
Mammal	Equus	ferus/caballus	Horse	Humerus	MidMax	Hum_MidMax	29	34.63	87.9	54.5448	10.9424	32.6601	76.4296		32.6601	87.9
Mammal	Equus	ferus/caballus	Horse	Humerus	MidMin	Hum_MidMin	29	28.28	69.72	41.8321	8.11469	25.6027	58.0614		25.6027	69.72
Mammal	Felis	catus	Cat	Humerus	MaxL	Hum_MaxL	40	72.82	117.22	97.503	9.43928	78.6244	116.382		72.82	117.22
Mammal	Felis	catus	Cat	Humerus	MaxPD	Hum_MaxPD	34	12	24.6	15.8412	2.19574	11.4497	20.2327		11.4497	24.6
Mammal	Felis	catus	Cat	Humerus	MaxPW	Hum_MaxPW	40	11.74	22	18.9828	2.42486	14.133	23.8325		11.74	23.8325
Mammal	Felis	catus	Cat	Humerus	MaxDD	Hum_MaxDD	34	8	12.6	10.1059	1.03542	8.03505	12.1767		8	12.6
Mammal	Felis	catus	Cat	Humerus	MaxDW	Hum_MaxDW	40	14.86	21.3	18.0912	1.72352	14.6442	21.5383		14.6442	21.5383
Mammal	Felis	catus	Cat	Humerus	MidMax	Hum_MidMax	34	7	10.86	9.26647	0.89821	7.47005	11.0629		7	11.0629
Mammal	Felis	catus	Cat	Humerus	MidMin	Hum_MidMin	34	5.99	8.79	7.52029	0.743446	6.0334	9.00719		5.99	9.00719
Bird	Gallus	gallus	Chicken	Humerus	MaxL	Hum_MaxL	31	51	100	77.3871	12.5689	52.2492	102.525		51	102.525
Bird	Gallus	gallus	Chicken	Humerus	MaxPD	Hum_MaxPD	31	6.6	15	11.0516	2.10774	6.83613	15.2671		6.6	15.2671
Bird	Gallus	gallus	Chicken	Humerus	MaxPW	Hum_MaxPW	31	13	28	20.9032	3.37001	14.1632	27.6433		13	28
Bird	Gallus	gallus	Chicken	Humerus	MaxDD	Hum_MaxDD	31	4	12	8.64516	1.95871	4.72773	12.5626		4	12.5626
Bird	Gallus	gallus	Chicken	Humerus	MaxDW	Hum_MaxDW	31	9	22	16.1935	2.80974	10.5741	21.813		9	22
Bird	Gallus	gallus	Chicken	Humerus	MidMax	Hum_MidMax	31	4.96	10.95	8.31065	1.29251	5.72563	10.8957		4.96	10.95
Bird	Gallus	gallus	Chicken	Humerus	MidMin	Hum_MidMin	31	3.97	8.78	6.61452	1.06919	4.47614	8.75289		3.97	8.78
Bird	Meleagris	gallopavo	Turkey	Humerus	MaxL	Hum_MaxL	34	113	158	138.824	13.192	112.44	165.208		112.44	165.208
Bird	Meleagris	gallopavo	Turkey	Humerus	MaxPD	Hum_MaxPD	35	17	27	22.0571	2.60026	16.8566	27.2577		16.8566	27.2577
Bird	Meleagris	gallopavo	Turkey	Humerus	MaxPW	Hum_MaxPW	35	30	45	37.6571	3.63757	30.382	44.9323		30	45
Bird	Meleagris	gallopavo	Turkey	Humerus	MaxDD	Hum_MaxDD	34	13	22	16.8529	2.21746	12.418	21.2879		12.418	22
Bird	Meleagris	gallopavo	Turkey	Humerus	MaxDW	Hum_MaxDW	34	24	34	29.1176	2.95178	23.2141	35.0212		23.2141	35.0212
Bird	Meleagris	gallopavo	Turkey	Humerus	MidMax	Hum_MidMax	34	11.96	17.99	14.9956	1.57458	11.8464	18.1447		11.8464	18.1447
Bird	Meleagris	gallopavo	Turkey	Humerus	MidMin	Hum_MidMin	34	9.23	13.31	11.4435	1.25139	8.94074	13.9463		8.94074	13.9463
Mammal	Odocoileus	hemionus	Mule Deer	Humerus	MaxL	Hum_MaxL	31	185	246	217.71	16.0191	185.671	249.748		185	249.748
Mammal	Odocoileus	hemionus	Mule Deer	Humerus	MaxPD	Hum_MaxPD	31	50	68	58.6129	4.43229	49.7483	67.4775		49.7483	68
Mammal	Odocoileus	hemionus	Mule Deer	Humerus	MaxPW	Hum_MaxPW	31	40	61	50.7742	4.73082	41.3126	60.2358		40	61
Mammal	Odocoileus	hemionus	Mule Deer	Humerus	MaxDD	Hum_MaxDD	31	31	45	37.6548	3.10374	31.4474	43.8623		31	45
Mammal	Odocoileus	hemionus	Mule Deer	Humerus	MaxDW	Hum_MaxDW	31	34	51	42.6358	3.43857	35.7587	49.5129		34	51
Mammal	Odocoileus	hemionus	Mule Deer	Humerus	MidMax	Hum_MidMax	31	20.2	33.91	26.7135	3.75885	19.1959	34.2312		19.1959	34.2312
Mammal	Odocoileus	hemionus	Mule Deer	Humerus	MidMin	Hum_MidMin	31	16.48	26.57	20.9029	2.62012	15.6627	26.1432		15.6627	26.57
Mammal	Odocoileus	virginianus	White-Tailed Deer	Humerus	MaxL	Hum_MaxL	33	160	231	194.212	20.3236	153.565	234.859		153.565	234.859
Mammal	Odocoileus	virginianus	White-Tailed Deer	Humerus	MaxPD	Hum_MaxPD	32	43	64	53.2656	5.64542	41.9748	64.5565		41.9748	64.5565
Mammal	Odocoileus	virginianus	White-Tailed Deer	Humerus	MaxPW	Hum_MaxPW	32	38	56	45.875	4.97575	35.9235	55.8265		35.9235	56
Mammal	Odocoileus	virginianus	White-Tailed Deer	Humerus	MaxDD	Hum_MaxDD	32	27	48	36.075	4.32241	27.4302	44.7198		27	48
Mammal	Odocoileus	virginianus	White-Tailed Deer	Humerus	MaxDW	Hum_MaxDW	32	32	45	38.535	3.73344	31.0681	46.0019		31.0681	46.0019
Mammal	Odocoileus	virginianus	White-Tailed Deer	Humerus	MidMax	Hum_MidMax	32	17.06	27	22.1328	2.58025	16.9723	27.2933		16.9723	27.2933
Mammal	Odocoileus	virginianus	White-Tailed Deer	Humerus	MidMin	Hum_MidMin	32	13.96	22	18.1603	2.20156	13.7572	22.5634		13.7572	22.5634
Mammal	Ovis	aries	Sheep	Humerus	MaxL	Hum_MaxL	18	116	178	153.556	16.6847	120.186	186.925		116	186.925
Mammal	Ovis	aries	Sheep	Humerus	MaxPD	Hum_MaxPD	8	34	52	44.5	6.16441	32.1712	56.8288		32.1712	56.8288
Mammal	Ovis	aries	Sheep	Humerus	MaxPW	Hum_MaxPW	8	28	50	41.125	7.16016	26.8047	55.4453		26.8047	55.4453
Mammal	Ovis	aries	Sheep	Humerus	MaxDD	Hum_MaxDD	66	19.9	32.2	24.5939	2.94858	18.6968	30.4911		18.6968	32.2
Mammal	Ovis	aries	Sheep	Humerus	MaxDW	Hum_MaxDW	77	23.9	48	31.3519	5.19217	20.9676	41.7363		20.9676	48
Mammal	Ovis	aries	Sheep	Humerus	MidMax	Hum_MidMax	8	11.5	26.59	20.6337	5.23005	10.1737	31.0938		10.1737	31.0938
Mammal	Ovis	aries	Sheep	Humerus	MidMin	Hum_MidMin	8	9.49	19.44	15.8963	3.33231	9.23163	22.5609		9.23163	22.5609
Mammal	Capra	hircus	Goat	Humerus	MaxL	Hum_MaxL	3	154	188	171	17	137	205		137	205
Mammal	Capra	hircus	Goat	Humerus	MaxPD	Hum_MaxPD	3	43	53	49.6667	5.7735	38.1197	61.2137		38.1197	61.2137
Mammal	Capra	hircus	Goat	Humerus	MaxPW	Hum_MaxPW	5	38	48.53	45.172	4.19624	36.7795	53.5645		36.7795	53.5645
Mammal	Capra	hircus	Goat	Humerus	MaxDD	Hum_MaxDD	81	21.9	35.8	27.8815	2.90529	22.0709	33.6921		21.9	35.8
Mammal	Capra	hircus	Goat	Humerus	MaxDW	Hum_MaxDW	77	27.6	44.6	33.7153	3.53826	26.6388	40.7919		26.6388	44.6
Mammal	Capra	hircus	Goat	Humerus	MidMax	Hum_MidMax	3	18.84	25.3	22.72	3.42058	15.8788	29.5612		15.8788	29.5612
Mammal	Capra	hircus	Goat	Humerus	MidMin	Hum_MidMin	3	17.12	22.94	19.8833	2.92107	14.0412	25.7255		14.0412	25.7255
Mammal	Ovis/Capra	aries/aegagrus	Sheep/Goat	Humerus	MaxL	Hum_MaxL	23	116	188	155.087	17.2097	120.668	189.506		116	189.506
Mammal	Ovis/Capra	aries/aegagrus	Sheep/Goat	Humerus	MaxPD	Hum_MaxPD	13	34	55	46.4615	6.2798	33.9019	59.0211		33.9019	59.0211
Mammal	Ovis/Capra	aries/aegagrus	Sheep/Goat	Humerus	MaxPW	Hum_MaxPW	15	28	55	43.2573	6.76138	29.7346	56.7801		28	56.7801
Mammal	Ovis/Capra	aries/aegagrus	Sheep/Goat	Humerus	MaxDD	Hum_MaxDD	149	19.9	35.8	26.4403	3.35382	19.7326	33.1479		19.7326	35.8
Mammal	Ovis/Capra	aries/aegagrus	Sheep/Goat	Humerus	MaxDW	Hum_MaxDW	156	23.9	48	32.6037	4.63114	23.3414	41.866		23.3414	48
Mammal	Ovis/Capra	aries/aegagrus	Sheep/Goat	Humerus	MidMax	Hum_MidMax	13	11.5	28	21.71	4.71937	12.2713	31.1487		11.5	31.1487
Mammal	Ovis/Capra	aries/aegagrus	Sheep/Goat	Humerus	MidMin	Hum_MidMin	13	9.49	22.94	17.2169	3.38957	10.4378	23.9961		9.49	23.9961
Mammal	Procyon	lotor	Raccoon	Humerus	MaxL	Hum_MaxL	36	80	114.02	99.0867	8.55006	81.9865	116.187		80	116.187
Mammal	Procyon	lotor	Raccoon	Humerus	MaxPD	Hum_MaxPD	31	16	24	20.5042	1.90872	16.6868	24.3216		16	24.3216
Mammal	Procyon	lotor	Raccoon	Humerus	MaxPW	Hum_MaxPW	31	14	25	17.5387	2.05178	13.4352	21.6423		13.4352	25
Mammal	Procyon	lotor	Raccoon	Humerus	MaxDD	Hum_MaxDD	31	9	15	11.1484	1.39137	8.36564	13.9311		8.36564	15
Mammal	Procyon	lotor	Raccoon	Humerus	MaxDW	Hum_MaxDW	35	18	26	22.1286	1.91922	18.2901	25.967		18	26
Mammal	Procyon	lotor	Raccoon	Humerus	MidMax	Hum_MidMax	31	7.19	12	10.2574	1.42537	7.40667	13.1082		7.19	13.1082
Mammal	Procyon	lotor	Raccoon	Humerus	MidMin	Hum_MidMin	31	5.45	9	7.24032	0.938511	5.3633	9.11734		5.3633	9.11734
Mammal	Sus	scrofa	Pig	Humerus	MaxL	Hum_MaxL	20	114	255.5	191.475	42.335	106.805	276.145		106.805	276.145
Mammal	Sus	scrofa	Pig	Humerus	MaxPD	Hum_MaxPD	10	46	96	70	12.561	44.8781	95.1219		44.8781	96
Mammal	Sus	scrofa	Pig	Humerus	MaxPW	Hum_MaxPW	10	33	100	66.1	24.0622	17.9756	114.224		17.9756	114.224
Mammal	Sus	scrofa	Pig	Humerus	MaxDD	Hum_MaxDD	10	34	63	49.4	10.2111	28.9778	69.8222		28.9778	69.8222
Mammal	Sus	scrofa	Pig	Humerus	MaxDW	Hum_MaxDW	20	34	66	47.55	8.99985	29.5503	65.5497		29.5503	66
Mammal	Sus	scrofa	Pig	Humerus	MidMax	Hum_MidMax	10	18.46	49	34.752	10.0127	14.7266	54.7774		14.7266	54.7774
Mammal	Sus	scrofa	Pig	Humerus	MidMin	Hum_MidMin	10	14.76	36	25.69	7.93015	9.8297	41.5503		9.8297	41.5503
Mammal	Sylvilagus	floridanus	Eastern Cotton-Tail	Humerus	MaxL	Hum_MaxL	35	54	67	61.3429	3.32498	54.6929	67.9928		54	67.9928
Mammal	Sylvilagus	floridanus	Eastern Cotton-Tail	Humerus	MaxPD	Hum_MaxPD	35	11	14	11.8	0.759257	10.2815	13.3185		10.2815	14
Mammal	Sylvilagus	floridanus	Eastern Cotton-Tail	Humerus	MaxPW	Hum_MaxPW	35	8	12	10.2	0.90098	8.39804	12.002		8	12.002
Mammal	Sylvilagus	floridanus	Eastern Cotton-Tail	Humerus	MaxDD	Hum_MaxDD	34	4	6	5.20588	0.478597	4.24869	6.16308		4	6.16308
Mammal	Sylvilagus	floridanus	Eastern Cotton-Tail	Humerus	MaxDW	Hum_MaxDW	34	6	8	7.61765	0.603761	6.41012	8.82517		6	8.82517
Mammal	Sylvilagus	floridanus	Eastern Cotton-Tail	Humerus	MidMax	Hum_MidMax	34	3.82	5.27	4.52147	0.364751	3.79197	5.25097		3.79197	5.27
Mammal	Sylvilagus	floridanus	Eastern Cotton-Tail	Humerus	MidMin	Hum_MidMin	34	3	4.62	3.85441	0.379451	3.09551	4.61331		3	4.62
Mammal	Urocyon	cinereoargenteus	Grey Fox	Humerus	MaxL	Hum_MaxL	39	83	111	103.017	5.00936	92.9979	113.035		83	113.035
Mammal	Urocyon	cinereoargenteus	Grey Fox	Humerus	MaxPD	Hum_MaxPD	31	11	17	15	1.12546	12.7491	17.2509		11	17.2509
Mammal	Urocyon	cinereoargenteus	Grey Fox	Humerus	MaxPW	Hum_MaxPW	31	19	25	21.8723	1.45666	18.9589	24.7856		18.9589	25
Mammal	Urocyon	cinereoargenteus	Grey Fox	Humerus	MaxDD	Hum_MaxDD	31	10	15	12.9032	0.978258	10.9467	14.8597		10	15
Mammal	Urocyon	cinereoargenteus	Grey Fox	Humerus	MaxDW	Hum_MaxDW	38	15	20	17.8308	1.08178	15.6672	19.9944		15	20
Mammal	Urocyon	cinereoargenteus	Grey Fox	Humerus	MidMax	Hum_MidMax	31	6.9	11	8.67	0.803803	7.06239	10.2776		6.9	11
Mammal	Urocyon	cinereoargenteus	Grey Fox	Humerus	MidMin	Hum_MidMin	31	5.67	8.85	7.07419	0.56742	5.93935	8.20903		5.67	8.85
Mammal	Ursus	americanus	Black Bear	Humerus	MaxL	Hum_MaxL	38	241	334	286.967	23.2894	240.388	333.546		240.388	334
Mammal	Ursus	americanus	Black Bear	Humerus	MaxPD	Hum_MaxPD	14	53	74	63.8571	5.81586	52.2254	75.4889		52.2254	75.4889
Mammal	Ursus	americanus	Black Bear	Humerus	MaxPW	Hum_MaxPW	14	46	62	56.1429	5.39026	45.3623	66.9234		45.3623	66.9234
Mammal	Ursus	americanus	Black Bear	Humerus	MaxDD	Hum_MaxDD	14	38	54	45.7857	5.3519	35.0819	56.4895		35.0819	56.4895
Mammal	Ursus	americanus	Black Bear	Humerus	MaxDW	Hum_MaxDW	36	57	103.2	79.5794	9.30121	60.977	98.1819		57	103.2
Mammal	Ursus	americanus	Black Bear	Humerus	MidMax	Hum_MidMax	14	24	38.67	32.9043	4.48667	23.9309	41.8776		23.9309	41.8776
Mammal	Ursus	americanus	Black Bear	Humerus	MidMin	Hum_MidMin	14	19	31	25.6436	3.38608	18.8714	32.4157		18.8714	32.4157
Mammal	Ursus	arctos	Brown Bear	Humerus	MaxL	Hum_MaxL	48	248.5	438.5	331.632	51.8358	227.96	435.303		227.96	438.5
Mammal	Ursus	arctos	Brown Bear	Humerus	MaxPD	Hum_MaxPD	18	56	90	74.6667	10.7594	53.1479	96.1855		53.1479	96.1855
Mammal	Ursus	arctos	Brown Bear	Humerus	MaxPW	Hum_MaxPW	18	56	128	82	21.9089	38.1822	125.818		38.1822	128
Mammal	Ursus	arctos	Brown Bear	Humerus	MaxDD	Hum_MaxDD	18	49	109	66.2222	15.437	35.3482	97.0962		35.3482	109
Mammal	Ursus	arctos	Brown Bear	Humerus	MaxDW	Hum_MaxDW	46	63	143.5	95.8867	19.9018	56.0831	135.69		56.0831	143.5
Mammal	Ursus	arctos	Brown Bear	Humerus	MidMax	Hum_MidMax	18	28.89	58.14	39.7594	7.36635	25.0267	54.4921		25.0267	58.14
Mammal	Ursus	arctos	Brown Bear	Humerus	MidMin	Hum_MidMin	18	22.06	46.54	31.1883	5.92841	19.3315	43.0451		19.3315	46.54
Mammal	Vulpes	vulpes	Red Fox	Humerus	MaxL	Hum_MaxL	43	97	146	124.013	9.14715	105.718	142.307		97	146
Mammal	Vulpes	vulpes	Red Fox	Humerus	MaxPD	Hum_MaxPD	38	15	25	17.8684	2.6526	12.5632	23.1736		12.5632	25
Mammal	Vulpes	vulpes	Red Fox	Humerus	MaxPW	Hum_MaxPW	38	15	27	22.8421	3.00024	16.8416	28.8426		15	28.8426
Mammal	Vulpes	vulpes	Red Fox	Humerus	MaxDD	Hum_MaxDD	38	12	17	14.3158	1.09311	12.1296	16.502		12	17
Mammal	Vulpes	vulpes	Red Fox	Humerus	MaxDW	Hum_MaxDW	42	17	23.12	20.0045	1.36034	17.2838	22.7252		17	23.12
Mammal	Vulpes	vulpes	Red Fox	Humerus	MidMax	Hum_MidMax	38	7.93	12	9.24079	0.812555	7.61568	10.8659		7.61568	12
Mammal	Vulpes	vulpes	Red Fox	Humerus	MidMin	Hum_MidMin	38	6	9	7.47947	0.563709	6.35206	8.60689		6	9
Bird	Aquila	chrysaetos	Golden Eagle	Humerus	MaxL	Hum_MaxL	21	173	204	187.476	8.95332	169.57	205.383		169.57	205.383
Bird	Aquila	chrysaetos	Golden Eagle	Humerus	MaxPD	Hum_MaxPD	21	20	26	21.381	1.62715	18.1267	24.6353		18.1267	26
Bird	Aquila	chrysaetos	Golden Eagle	Humerus	MaxPW	Hum_MaxPW	21	35	44	39.619	2.47944	34.6602	44.5779		34.6602	44.5779
Bird	Aquila	chrysaetos	Golden Eagle	Humerus	MaxDD	Hum_MaxDD	21	16	22	18.9524	1.85678	15.2388	22.6659		15.2388	22.6659
Bird	Aquila	chrysaetos	Golden Eagle	Humerus	MaxDW	Hum_MaxDW	21	30	37	32.9524	2.03657	28.8792	37.0255		28.8792	37.0255
Bird	Aquila	chrysaetos	Golden Eagle	Humerus	MidMax	Hum_MidMax	21	12.56	15.79	13.8338	0.756707	12.3204	15.3472		12.3204	15.79
Bird	Aquila	chrysaetos	Golden Eagle	Humerus	MidMin	Hum_MidMin	21	11.12	13.63	12.1367	0.610846	10.915	13.3584		10.915	13.63
Turtle	Terrapene	carolina	Common Box Turtle	Humerus	MaxL	Hum_MaxL	31	20	37	29.7097	3.53264	22.6444	36.775		20	37
Turtle	Terrapene	carolina	Common Box Turtle	Humerus	MaxPD	Hum_MaxPD	31	5	12	9.70968	1.29598	7.11771	12.3016		5	12.3016
Turtle	Terrapene	carolina	Common Box Turtle	Humerus	MaxPW	Hum_MaxPW	31	6	12	9.41935	1.23218	6.95499	11.8837		6	12
Turtle	Terrapene	carolina	Common Box Turtle	Humerus	MaxDD	Hum_MaxDD	31	3	6	4.3871	0.760588	2.86592	5.90827		2.86592	6
Turtle	Terrapene	carolina	Common Box Turtle	Humerus	MaxDW	Hum_MaxDW	31	4	10	7.90323	1.19317	5.51688	10.2896		4	10.2896
Turtle	Terrapene	carolina	Common Box Turtle	Humerus	MidMax	Hum_MidMax	31	3.01	5.28	4.01935	0.539518	2.94032	5.09839		2.94032	5.28
Turtle	Terrapene	carolina	Common Box Turtle	Humerus	MidMin	Hum_MidMin	31	2.52	4.27	3.15806	0.405318	2.34743	3.9687		2.34743	4.27
Turtle	Chelydra	serpentina	Common Snapping Turtle	Humerus	MaxL	Hum_MaxL	30	22	90	52.2967	15.6039	21.0889	83.5045		21.0889	90
Turtle	Chelydra	serpentina	Common Snapping Turtle	Humerus	MaxPD	Hum_MaxPD	30	6	38	20.7553	6.78589	7.18356	34.3271		6	38
Turtle	Chelydra	serpentina	Common Snapping Turtle	Humerus	MaxPW	Hum_MaxPW	30	10	43	23.5673	7.51345	8.54044	38.5942		8.54044	43
Turtle	Chelydra	serpentina	Common Snapping Turtle	Humerus	MaxDD	Hum_MaxDD	30	3.71	19	9.717	3.45614	2.80473	16.6293		2.80473	19
Turtle	Chelydra	serpentina	Common Snapping Turtle	Humerus	MaxDW	Hum_MaxDW	30	8.14	37	21.6867	6.47256	8.74155	34.6318		8.14	37
Turtle	Chelydra	serpentina	Common Snapping Turtle	Humerus	MidMax	Hum_MidMax	30	3.37	14.65	9.01767	2.30209	4.4135	13.6218		3.37	14.65
Turtle	Chelydra	serpentina	Common Snapping Turtle	Humerus	MidMin	Hum_MidMin	30	2.42	10.22	6.34033	1.73575	2.86884	9.81183		2.42	10.22
Mammal	Homo	sapiens	Human	Humerus	MaxL	Hum_MaxL	2567	225	397	309.251	23.4984	262.254	356.247		225	397
Mammal	Homo	sapiens	Human	Humerus	MaxPD	Hum_MaxPD	94	35	56	46.1862	4.4456	37.295	55.0774		35	56
Mammal	Homo	sapiens	Human	Humerus	MaxPW	Hum_MaxPW	411	37.5	62	49.236	4.33255	40.5709	57.9011		37.5	62
Mammal	Homo	sapiens	Human	Humerus	MaxDD	Hum_MaxDD	94	21.5	37	28.2181	3.2516	21.7149	34.7213		21.5	37
Mammal	Homo	sapiens	Human	Humerus	MaxDW	Hum_MaxDW	1867	41.5	77	58.5101	5.64172	47.2267	69.7936		41.5	77
Mammal	Homo	sapiens	Human	Humerus	MidMax	Hum_MidMax	425	15.9	31.52	22.5505	2.56124	17.428	27.673		15.9	31.52
Mammal	Homo	sapiens	Human	Humerus	MidMin	Hum_MidMin	440	11	24	17.8169	2.4385	12.9399	22.6939		11	24

## Sheet: TableS2_Femur
Table S2. Descriptive statistics for femoral measurements collected by species.
Class	Genus	Species	Common_Name	Bone	Measurement	Variable	Count	Min	Max	Ave	SD	SD2-	SD2+		Web_Min	Web_Max
Mammal	Alces	alces	Moose	Femur	MaxL	Fem_MaxL	16	317	486	424.688	46.7471	331.193	518.182		317	518.182
Mammal	Alces	alces	Moose	Femur	MaxPD	Fem_MaxPD	15	46	79	60.642	7.82743	44.9871	76.2969		44.9871	79
Mammal	Alces	alces	Moose	Femur	MaxPW	Fem_MaxPW	15	87	139.58	114.848	13.5135	87.821	141.875		87	141.875
Mammal	Alces	alces	Moose	Femur	MaxDD	Fem_MaxDD	15	40.92	56.58	49.7073	3.63836	42.4306	56.984		40.92	56.984
Mammal	Alces	alces	Moose	Femur	MaxDW	Fem_MaxDW	16	101	137	124.377	8.74036	106.896	141.858		101	141.858
Mammal	Alces	alces	Moose	Femur	MidMax	Fem_MidMax	16	81	120	101.248	10.1752	80.8978	121.598		80.8978	121.598
Mammal	Alces	alces	Moose	Femur	MidMin	Fem_MidMin	15	30.32	54.95	46.102	7.44552	31.211	60.993		30.32	60.993
Mammal	Alces	alces	Moose	Femur	FHD	Fem_FHD	15	24.41	45.73	36.802	5.73781	25.3264	48.2776		24.41	48.2776
Mammal	Anas	platyrhynchos	Mallard Duck	Femur	MaxL	Fem_MaxL	28	47	67	52.3214	5.22142	41.8786	62.7643		41.8786	67
Mammal	Anas	platyrhynchos	Mallard Duck	Femur	MaxPD	Fem_MaxPD	28	8	15	10.5714	1.87436	6.82271	14.3201		6.82271	15
Mammal	Anas	platyrhynchos	Mallard Duck	Femur	MaxPW	Fem_MaxPW	28	10	17	11.1429	1.79947	7.54392	14.7418		7.54392	17
Mammal	Anas	platyrhynchos	Mallard Duck	Femur	MaxDD	Fem_MaxDD	28	7	15	9.92857	1.80388	6.32082	13.5363		6.32082	15
Mammal	Anas	platyrhynchos	Mallard Duck	Femur	MaxDW	Fem_MaxDW	28	10	18	12.1071	1.89227	8.3226	15.8917		8.3226	18
Mammal	Anas	platyrhynchos	Mallard Duck	Femur	MidMax	Fem_MidMax	28	5	8.6	6.04107	0.743875	4.55332	7.52882		4.55332	8.6
Mammal	Anas	platyrhynchos	Mallard Duck	Femur	MidMin	Fem_MidMin	28	4.04	6.61	4.65607	0.673682	3.30871	6.00343		3.30871	6.61
Mammal	Anas	platyrhynchos	Mallard Duck	Femur	FHD	Fem_FHD	28	4.89	8.44	5.84821	0.871211	4.10579	7.59064		4.10579	8.44
Mammal	Bos	taurus	Cow	Femur	MaxL	Fem_MaxL	14	199	479	389.5	81.2127	227.075	551.925		199	551.925
Mammal	Bos	taurus	Cow	Femur	MaxPD	Fem_MaxPD	13	43	115	83.2308	20.5635	42.1037	124.358		42.1037	124.358
Mammal	Bos	taurus	Cow	Femur	MaxPW	Fem_MaxPW	13	61	170	132.154	29.4019	73.35	190.958		61	190.958
Mammal	Bos	taurus	Cow	Femur	MaxDD	Fem_MaxDD	13	85	170	133.923	24.7772	84.3687	183.478		84.3687	183.478
Mammal	Bos	taurus	Cow	Femur	MaxDW	Fem_MaxDW	14	70	135	106.429	19.445	67.5385	145.319		67.5385	145.319
Mammal	Bos	taurus	Cow	Femur	MidMax	Fem_MidMax	10	22.94	67.58	49.24	14.4406	20.3588	78.1212		20.3588	78.1212
Mammal	Bos	taurus	Cow	Femur	MidMin	Fem_MidMin	10	22.65	51.31	40.275	9.7318	20.8114	59.7386		20.8114	59.7386
Mammal	Bos	taurus	Cow	Femur	FHD	Fem_FHD	12	36.7	65.85	52.11	9.8478	32.4144	71.8056		32.4144	71.8056
Mammal	Branta	canadensis	Canadian Goose	Femur	MaxL	Fem_MaxL	34	56	89	72.5882	10.523	51.5422	93.6343		51.5422	93.6343
Mammal	Branta	canadensis	Canadian Goose	Femur	MaxPD	Fem_MaxPD	34	11	21	15.6176	2.92341	9.77082	21.4645		9.77082	21.4645
Mammal	Branta	canadensis	Canadian Goose	Femur	MaxPW	Fem_MaxPW	34	12	22	16.6471	2.55701	11.533	21.7611		11.533	22
Mammal	Branta	canadensis	Canadian Goose	Femur	MaxDD	Fem_MaxDD	34	11	20	14.3529	2.78396	8.78502	19.9209		8.78502	20
Mammal	Branta	canadensis	Canadian Goose	Femur	MaxDW	Fem_MaxDW	34	13	23	18.0588	2.933	12.1928	23.9248		12.1928	23.9248
Mammal	Branta	canadensis	Canadian Goose	Femur	MidMax	Fem_MidMax	34	5.92	10	7.77206	1.32465	5.12275	10.4214		5.12275	10.4214
Mammal	Branta	canadensis	Canadian Goose	Femur	MidMin	Fem_MidMin	34	5.17	9	6.84559	1.1927	4.4602	9.23098		4.4602	9.23098
Mammal	Branta	canadensis	Canadian Goose	Femur	FHD	Fem_FHD	34	6.13	11.01	8.31235	1.41582	5.48071	11.144		5.48071	11.144
Mammal	Canis	familiaris	Dog	Femur	MaxL	Fem_MaxL	147	71	281	165.988	49.0999	67.7881	264.187		67.7881	281
Mammal	Canis	familiaris	Dog	Femur	MaxPD	Fem_MaxPD	40	8.09	40	22.2272	7.42211	7.38303	37.0715		7.38303	40
Mammal	Canis	familiaris	Dog	Femur	MaxPW	Fem_MaxPW	137	15.38	62	36.7232	10.7654	15.1924	58.254		15.1924	62
Mammal	Canis	familiaris	Dog	Femur	MaxDD	Fem_MaxDD	40	13.19	60	37.8058	11.7543	14.2971	61.3144		13.19	61.3144
Mammal	Canis	familiaris	Dog	Femur	MaxDW	Fem_MaxDW	85	14.31	51	31.4533	8.96257	13.5282	49.3784		13.5282	51
Mammal	Canis	familiaris	Dog	Femur	MidMax	Fem_MidMax	39	4.99	23.52	14.5718	4.65533	5.26113	23.8825		4.99	23.8825
Mammal	Canis	familiaris	Dog	Femur	MidMin	Fem_MidMin	39	4.34	19.86	12.9769	4.00972	4.95749	20.9964		4.34	20.9964
Mammal	Canis	familiaris	Dog	Femur	FHD	Fem_FHD	40	8.09	30.49	18.9708	5.37845	8.21385	29.7276		8.09	30.49
Mammal	Canis	latrans	Coyote	Femur	MaxL	Fem_MaxL	65	150	201.33	173.466	10.8849	151.696	195.235		150	201.33
Mammal	Canis	latrans	Coyote	Femur	MaxPD	Fem_MaxPD	28	15	23	18.9643	2.13406	14.6962	23.2324		14.6962	23.2324
Mammal	Canis	latrans	Coyote	Femur	MaxPW	Fem_MaxPW	28	27	38	33.8929	2.98564	27.9216	39.8641		27	39.8641
Mammal	Canis	latrans	Coyote	Femur	MaxDD	Fem_MaxDD	28	26	37	31.1911	2.64855	25.894	36.4882		25.894	37
Mammal	Canis	latrans	Coyote	Femur	MaxDW	Fem_MaxDW	64	24	37	27.9302	2.34075	23.2487	32.6116		23.2487	37
Mammal	Canis	latrans	Coyote	Femur	MidMax	Fem_MidMax	28	9.85	16.32	12.93	1.31606	10.2979	15.5621		9.85	16.32
Mammal	Canis	latrans	Coyote	Femur	MidMin	Fem_MidMin	28	9.03	12.99	10.9229	0.952715	9.01743	12.8283		9.01743	12.99
Mammal	Canis	latrans	Coyote	Femur	FHD	Fem_FHD	57	14.04	18.65	16.5193	1.19014	14.139	18.8996		14.04	18.8996
Mammal	Canis	lupus	Wolf	Femur	MaxL	Fem_MaxL	45	185.09	274.69	221.705	22.0616	177.582	265.828		177.582	274.69
Mammal	Canis	lupus	Wolf	Femur	MaxPD	Fem_MaxPD	28	21.45	32.83	26.5546	2.55954	21.4356	31.6737		21.4356	32.83
Mammal	Canis	lupus	Wolf	Femur	MaxPW	Fem_MaxPW	28	41.26	59.26	46.9182	4.22526	38.4677	55.3687		38.4677	59.26
Mammal	Canis	lupus	Wolf	Femur	MaxDD	Fem_MaxDD	28	38.29	53.86	43.7936	4.02121	35.7512	51.836		35.7512	53.86
Mammal	Canis	lupus	Wolf	Femur	MaxDW	Fem_MaxDW	43	32.33	49.57	40.6179	4.09274	32.4324	48.8034		32.33	49.57
Mammal	Canis	lupus	Wolf	Femur	MidMax	Fem_MidMax	28	14.68	19.87	17.455	1.45254	14.5499	20.3601		14.5499	20.3601
Mammal	Canis	lupus	Wolf	Femur	MidMin	Fem_MidMin	28	13.12	18.35	15.2482	1.19366	12.8609	17.6355		12.8609	18.35
Mammal	Canis	lupus	Wolf	Femur	FHD	Fem_FHD	37	18.88	30.2	23.7614	2.55699	18.6474	28.8753		18.6474	30.2
Mammal	Cervus	canadensis/elaphus	Elk	Femur	MaxL	Fem_MaxL	33	325	423	377.242	22.2529	332.737	421.748		325	423
Mammal	Cervus	canadensis/elaphus	Elk	Femur	MaxPD	Fem_MaxPD	33	43	68	56.3636	5.54424	45.2751	67.4521		43	68
Mammal	Cervus	canadensis/elaphus	Elk	Femur	MaxPW	Fem_MaxPW	33	84	121	104.758	8.41141	87.9347	121.58		84	121.58
Mammal	Cervus	canadensis/elaphus	Elk	Femur	MaxDD	Fem_MaxDD	33	89	127	110.273	8.0478	94.1771	126.368		89	127
Mammal	Cervus	canadensis/elaphus	Elk	Femur	MaxDW	Fem_MaxDW	33	68	105	89.4848	6.69478	76.0953	102.874		68	105
Mammal	Cervus	canadensis/elaphus	Elk	Femur	MidMax	Fem_MidMax	33	32.54	49.65	39.6309	3.61586	32.3992	46.8626		32.3992	49.65
Mammal	Cervus	canadensis/elaphus	Elk	Femur	MidMin	Fem_MidMin	33	27.42	43.5	34.0342	3.41932	27.1956	40.8729		27.1956	43.5
Mammal	Cervus	canadensis/elaphus	Elk	Femur	FHD	Fem_FHD	33	34.56	50.9	44.047	3.52016	37.0066	51.0873		34.56	51.0873
Mammal	Didelphis	virginiana	Opossum	Femur	MaxL	Fem_MaxL	34	67	99	81.2353	6.836	67.5633	94.9073		67	99
Mammal	Didelphis	virginiana	Opossum	Femur	MaxPD	Fem_MaxPD	33	7	13	9.49091	1.3703	6.75031	12.2315		6.75031	13
Mammal	Didelphis	virginiana	Opossum	Femur	MaxPW	Fem_MaxPW	33	13	22	17.1121	2.00371	13.1047	21.1195		13	22
Mammal	Didelphis	virginiana	Opossum	Femur	MaxDD	Fem_MaxDD	33	8	17	12.387	1.88838	8.61021	16.1637		8	17
Mammal	Didelphis	virginiana	Opossum	Femur	MaxDW	Fem_MaxDW	33	12	17	15.0582	1.19758	12.663	17.4534		12	17.4534
Mammal	Didelphis	virginiana	Opossum	Femur	MidMax	Fem_MidMax	33	5.45	8.85	7.13485	0.916553	5.30174	8.96795		5.30174	8.96795
Mammal	Didelphis	virginiana	Opossum	Femur	MidMin	Fem_MidMin	33	4.58	7.35	5.97636	0.729211	4.51794	7.43479		4.51794	7.43479
Mammal	Didelphis	virginiana	Opossum	Femur	FHD	Fem_FHD	33	7.15	10.43	8.57333	0.775539	7.02226	10.1244		7.02226	10.43
Mammal	Equus	ferus/caballus	Horse	Femur	MaxL	Fem_MaxL	33	305	527	431.152	50.4388	330.274	532.029		305	532.029
Mammal	Equus	ferus/caballus	Horse	Femur	MaxPD	Fem_MaxPD	32	65	133	95.3438	17.5382	60.2674	130.42		60.2674	133
Mammal	Equus	ferus/caballus	Horse	Femur	MaxPW	Fem_MaxPW	32	91	159	126.781	18.8281	89.125	164.438		89.125	164.438
Mammal	Equus	ferus/caballus	Horse	Femur	MaxDD	Fem_MaxDD	32	93	171	128.406	18.5956	91.215	165.598		91.215	171
Mammal	Equus	ferus/caballus	Horse	Femur	MaxDW	Fem_MaxDW	32	71	138	104.562	15.6719	73.2187	135.906		71	138
Mammal	Equus	ferus/caballus	Horse	Femur	MidMax	Fem_MidMax	31	38.81	95.79	61.0377	11.5501	37.9376	84.1379		37.9376	95.79
Mammal	Equus	ferus/caballus	Horse	Femur	MidMin	Fem_MidMin	31	30.25	80.38	47.0055	11.0299	24.9456	69.0654		24.9456	80.38
Mammal	Equus	ferus/caballus	Horse	Femur	FHD	Fem_FHD	31	42.74	81.28	63.8958	9.50439	44.887	82.9046		42.74	82.9046
Mammal	Felis	catus	Cat	Femur	MaxL	Fem_MaxL	39	78.04	129.24	107.194	10.7399	85.7146	128.674		78.04	129.24
Mammal	Felis	catus	Cat	Femur	MaxPD	Fem_MaxPD	33	10	14	12.5152	1.22783	10.0595	14.9708		10	14.9708
Mammal	Felis	catus	Cat	Femur	MaxPW	Fem_MaxPW	39	12	24.42	19.849	2.35754	15.1339	24.5641		12	24.5641
Mammal	Felis	catus	Cat	Femur	MaxDD	Fem_MaxDD	33	10	25	17.1379	2.40426	12.3294	21.9464		10	25
Mammal	Felis	catus	Cat	Femur	MaxDW	Fem_MaxDW	39	11	22.61	18.0446	2.3184	13.4078	22.6814		11	22.6814
Mammal	Felis	catus	Cat	Femur	MidMax	Fem_MidMax	33	7	10.6	9.34909	0.770407	7.80828	10.8899		7	10.8899
Mammal	Felis	catus	Cat	Femur	MidMin	Fem_MidMin	33	6.62	9.88	8.01606	0.718983	6.57809	9.45403		6.57809	9.88
Mammal	Felis	catus	Cat	Femur	FHD	Fem_FHD	39	8	11.32	9.99872	0.89496	8.2088	11.7886		8	11.7886
Bird	Gallus	gallus	Chicken	Femur	MaxL	Fem_MaxL	31	57	118	86.871	14.9661	56.9389	116.803		56.9389	118
Bird	Gallus	gallus	Chicken	Femur	MaxPD	Fem_MaxPD	31	6	21	14.9355	3.53021	7.87507	21.9959		6	21.9959
Bird	Gallus	gallus	Chicken	Femur	MaxPW	Fem_MaxPW	31	12	27	18.2258	3.80096	10.6239	25.8277		10.6239	27
Bird	Gallus	gallus	Chicken	Femur	MaxDD	Fem_MaxDD	31	9	22	14.9032	2.89085	9.12153	20.6849		9	22
Bird	Gallus	gallus	Chicken	Femur	MaxDW	Fem_MaxDW	31	11	26	18.0323	3.71917	10.5939	25.4706		10.5939	26
Bird	Gallus	gallus	Chicken	Femur	MidMax	Fem_MidMax	31	5.66	12.12	8.41097	1.50384	5.40329	11.4186		5.40329	12.12
Bird	Gallus	gallus	Chicken	Femur	MidMin	Fem_MidMin	31	4.53	11.28	7.67581	1.41707	4.84166	10.5099		4.53	11.28
Bird	Gallus	gallus	Chicken	Femur	FHD	Fem_FHD	31	4.54	10.73	7.71548	1.4975	4.72048	10.7105		4.54	10.73
Bird	Meleagris	gallopavo	Turkey	Femur	MaxL	Fem_MaxL	35	105	144	127.571	11.5409	104.49	150.653		104.49	150.653
Bird	Meleagris	gallopavo	Turkey	Femur	MaxPD	Fem_MaxPD	35	15	28	22.8286	3.25834	16.3119	29.3453		15	29.3453
Bird	Meleagris	gallopavo	Turkey	Femur	MaxPW	Fem_MaxPW	35	23	35	28.9143	3.41598	22.0823	35.7462		22.0823	35.7462
Bird	Meleagris	gallopavo	Turkey	Femur	MaxDD	Fem_MaxDD	35	18	28	22.5143	2.67198	17.1703	27.8583		17.1703	28
Bird	Meleagris	gallopavo	Turkey	Femur	MaxDW	Fem_MaxDW	35	22	31	27.0286	2.91533	21.1979	32.8592		21.1979	32.8592
Bird	Meleagris	gallopavo	Turkey	Femur	MidMax	Fem_MidMax	35	9.89	15	12.42	1.25632	9.90737	14.9326		9.89	15
Bird	Meleagris	gallopavo	Turkey	Femur	MidMin	Fem_MidMin	35	8.08	14	10.676	1.29534	8.08532	13.2667		8.08	14
Bird	Meleagris	gallopavo	Turkey	Femur	FHD	Fem_FHD	35	8.47	12.97	11.1291	1.30503	8.51907	13.7392		8.47	13.7392
Mammal	Odocoileus	hemionus	Mule Deer	Femur	MaxL	Fem_MaxL	32	181	301	256.156	24.1088	207.939	304.374		181	304.374
Mammal	Odocoileus	hemionus	Mule Deer	Femur	MaxPD	Fem_MaxPD	32	26	47	34.75	4.55079	25.6484	43.8516		25.6484	47
Mammal	Odocoileus	hemionus	Mule Deer	Femur	MaxPW	Fem_MaxPW	32	42	73	59.875	6.4245	47.026	72.724		42	73
Mammal	Odocoileus	hemionus	Mule Deer	Femur	MaxDD	Fem_MaxDD	32	54	80	66.9062	5.28149	56.3433	77.4692		54	80
Mammal	Odocoileus	hemionus	Mule Deer	Femur	MaxDW	Fem_MaxDW	32	42	63	53.9375	4.77181	44.3939	63.4811		42	63.4811
Mammal	Odocoileus	hemionus	Mule Deer	Femur	MidMax	Fem_MidMax	32	16.05	31.23	24.1006	3.47585	17.1489	31.0523		16.05	31.23
Mammal	Odocoileus	hemionus	Mule Deer	Femur	MidMin	Fem_MidMin	32	14.97	26	20.2884	2.53125	15.2259	25.3509		14.97	26
Mammal	Odocoileus	hemionus	Mule Deer	Femur	FHD	Fem_FHD	32	21.04	30.19	26.1347	2.1277	21.8793	30.3901		21.04	30.3901
Mammal	Odocoileus	virginianus	White-Tailed Deer	Femur	MaxL	Fem_MaxL	39	195	277	238.179	24.6532	188.873	287.486		188.873	287.486
Mammal	Odocoileus	virginianus	White-Tailed Deer	Femur	MaxPD	Fem_MaxPD	38	25	39	31.5	3.16868	25.1626	37.8374		25	39
Mammal	Odocoileus	virginianus	White-Tailed Deer	Femur	MaxPW	Fem_MaxPW	38	43	64	55.1053	4.91984	45.2656	64.9449		43	64.9449
Mammal	Odocoileus	virginianus	White-Tailed Deer	Femur	MaxDD	Fem_MaxDD	38	51	73	64.7895	5.45823	53.873	75.7059		51	75.7059
Mammal	Odocoileus	virginianus	White-Tailed Deer	Femur	MaxDW	Fem_MaxDW	38	34	59	49.9474	5.37234	39.2027	60.692		34	60.692
Mammal	Odocoileus	virginianus	White-Tailed Deer	Femur	MidMax	Fem_MidMax	38	17.39	25.29	21.6032	2.05117	17.5008	25.7055		17.39	25.7055
Mammal	Odocoileus	virginianus	White-Tailed Deer	Femur	MidMin	Fem_MidMin	38	15	22	18.7968	1.94192	14.913	22.6807		14.913	22.6807
Mammal	Odocoileus	virginianus	White-Tailed Deer	Femur	FHD	Fem_FHD	38	19.84	27.96	24.1092	2.28044	19.5483	28.6701		19.5483	28.6701
Mammal	Ovis	aries	Sheep	Femur	MaxL	Fem_MaxL	18	140	208	183.722	16.7922	150.138	217.307		140	217.307
Mammal	Ovis	aries	Sheep	Femur	MaxPD	Fem_MaxPD	8	20	35	28.25	4.36708	19.5158	36.9842		19.5158	36.9842
Mammal	Ovis	aries	Sheep	Femur	MaxPW	Fem_MaxPW	8	36	57	48.5	6.56832	35.3634	61.6366		35.3634	61.6366
Mammal	Ovis	aries	Sheep	Femur	MaxDD	Fem_MaxDD	8	40	56	50.5	5.07093	40.3581	60.6419		40	60.6419
Mammal	Ovis	aries	Sheep	Femur	MaxDW	Fem_MaxDW	18	31	51	44.4444	4.73065	34.9831	53.9058		31	53.9058
Mammal	Ovis	aries	Sheep	Femur	MidMax	Fem_MidMax	8	11.59	24.52	19.6913	3.85819	11.9749	27.4076		11.59	27.4076
Mammal	Ovis	aries	Sheep	Femur	MidMin	Fem_MidMin	8	10.27	20.26	16.8513	3.1214	10.6084	23.0941		10.27	23.0941
Mammal	Ovis	aries	Sheep	Femur	FHD	Fem_FHD	8	18.26	25.56	22.495	2.24182	18.0114	26.9786		18.0114	26.9786
Mammal	Capra	hircus	Goat	Femur	MaxL	Fem_MaxL	3	170	201	188.667	16.4418	155.783	221.55		155.783	221.55
Mammal	Capra	hircus	Goat	Femur	MaxPD	Fem_MaxPD	3	25	29	27.6667	2.3094	23.0479	32.2855		23.0479	32.2855
Mammal	Capra	hircus	Goat	Femur	MaxPW	Fem_MaxPW	3	40	50	45.3333	5.03322	35.2669	55.3998		35.2669	55.3998
Mammal	Capra	hircus	Goat	Femur	MaxDD	Fem_MaxDD	3	46	51	48.3333	2.51661	43.3001	53.3666		43.3001	53.3666
Mammal	Capra	hircus	Goat	Femur	MaxDW	Fem_MaxDW	3	35	44.5	40.5	4.92443	30.6511	50.3489		30.6511	50.3489
Mammal	Capra	hircus	Goat	Femur	MidMax	Fem_MidMax	3	18.04	23.3	20.5267	2.64169	15.2433	25.81		15.2433	25.81
Mammal	Capra	hircus	Goat	Femur	MidMin	Fem_MidMin	3	15.77	20.8	18.2967	2.51508	13.2665	23.3268		13.2665	23.3268
Mammal	Capra	hircus	Goat	Femur	FHD	Fem_FHD	3	19.86	25.25	22.2867	2.73478	16.8171	27.7562		16.8171	27.7562
Mammal	Ovis/Capra	aries/aegagrus	Sheep/Goat	Femur	MaxL	Fem_MaxL	22	140	208	183.545	16.5579	150.43	216.661		140	216.661
Mammal	Ovis/Capra	aries/aegagrus	Sheep/Goat	Femur	MaxPD	Fem_MaxPD	12	20	35	27.75	3.81683	20.1163	35.3837		20	35.3837
Mammal	Ovis/Capra	aries/aegagrus	Sheep/Goat	Femur	MaxPW	Fem_MaxPW	12	36	57	47.5833	5.83809	35.9071	59.2595		35.9071	59.2595
Mammal	Ovis/Capra	aries/aegagrus	Sheep/Goat	Femur	MaxDD	Fem_MaxDD	12	40	56	49.5833	4.44069	40.702	58.4647		40	58.4647
Mammal	Ovis/Capra	aries/aegagrus	Sheep/Goat	Femur	MaxDW	Fem_MaxDW	22	31	51	43.7045	4.79747	34.1096	53.2995		31	53.2995
Mammal	Ovis/Capra	aries/aegagrus	Sheep/Goat	Femur	MidMax	Fem_MidMax	12	11.59	24.52	19.9258	3.29855	13.3287	26.5229		11.59	26.5229
Mammal	Ovis/Capra	aries/aegagrus	Sheep/Goat	Femur	MidMin	Fem_MidMin	12	10.27	20.8	17.3917	2.83218	11.7273	23.056		10.27	23.056
Mammal	Ovis/Capra	aries/aegagrus	Sheep/Goat	Femur	FHD	Fem_FHD	12	18.26	25.56	22.4017	2.14071	18.1202	26.6831		18.1202	26.6831
Mammal	Procyon	lotor	Raccoon	Femur	MaxL	Fem_MaxL	37	87	131	114.262	9.96076	94.3409	134.184		87	134.184
Mammal	Procyon	lotor	Raccoon	Femur	MaxPD	Fem_MaxPD	31	10	16	12.391	1.36328	9.66441	15.1175		9.66441	16
Mammal	Procyon	lotor	Raccoon	Femur	MaxPW	Fem_MaxPW	31	19	31	24.871	2.43231	20.0063	29.7356		19	31
Mammal	Procyon	lotor	Raccoon	Femur	MaxDD	Fem_MaxDD	31	13	23	19.0677	2.22012	14.6275	23.508		13	23.508
Mammal	Procyon	lotor	Raccoon	Femur	MaxDW	Fem_MaxDW	36	19	26	22.8011	1.88796	19.0252	26.577		19	26.577
Mammal	Procyon	lotor	Raccoon	Femur	MidMax	Fem_MidMax	31	6.92	12	9.72968	1.18423	7.36123	12.0981		6.92	12.0981
Mammal	Procyon	lotor	Raccoon	Femur	MidMin	Fem_MidMin	31	6.33	11	8.50968	1.04577	6.41814	10.6012		6.33	11
Mammal	Procyon	lotor	Raccoon	Femur	FHD	Fem_FHD	36	10.76	15	13.0858	1.01025	11.0653	15.1063		10.76	15.1063
Mammal	Sus	scrofa	Pig	Femur	MaxL	Fem_MaxL	17	145	282.5	199.676	35.1892	129.298	270.055		129.298	282.5
Mammal	Sus	scrofa	Pig	Femur	MaxPD	Fem_MaxPD	7	25	53	38.4286	10.0143	18.4	58.4571		18.4	58.4571
Mammal	Sus	scrofa	Pig	Femur	MaxPW	Fem_MaxPW	7	43	85	61	12.7671	35.4657	86.5343		35.4657	86.5343
Mammal	Sus	scrofa	Pig	Femur	MaxDD	Fem_MaxDD	7	55	82	66.5714	8.28366	50.0041	83.1388		50.0041	83.1388
Mammal	Sus	scrofa	Pig	Femur	MaxDW	Fem_MaxDW	17	37	68	47.8824	6.85458	34.1732	61.5915		34.1732	68
Mammal	Sus	scrofa	Pig	Femur	MidMax	Fem_MidMax	7	18.42	36.3	25.8214	5.44233	14.9368	36.7061		14.9368	36.7061
Mammal	Sus	scrofa	Pig	Femur	MidMin	Fem_MidMin	7	14.61	34.5	21.88	6.11354	9.65293	34.1071		9.65293	34.5
Mammal	Sus	scrofa	Pig	Femur	FHD	Fem_FHD	6	21.32	37	27.325	5.22317	16.8787	37.7713		16.8787	37.7713
Mammal	Sylvilagus	floridanus	Eastern Cotton-Tail	Femur	MaxL	Fem_MaxL	34	58	87	79.5882	5.16467	69.2589	89.9176		58	89.9176
Mammal	Sylvilagus	floridanus	Eastern Cotton-Tail	Femur	MaxPD	Fem_MaxPD	33	6	9	7.12121	0.73983	5.64155	8.60087		5.64155	9
Mammal	Sylvilagus	floridanus	Eastern Cotton-Tail	Femur	MaxPW	Fem_MaxPW	33	12	19	15.9091	1.52815	12.8528	18.9654		12	19
Mammal	Sylvilagus	floridanus	Eastern Cotton-Tail	Femur	MaxDD	Fem_MaxDD	33	9	16	14.4242	1.65888	11.1065	17.742		9	17.742
Mammal	Sylvilagus	floridanus	Eastern Cotton-Tail	Femur	MaxDW	Fem_MaxDW	33	10	14	12.6364	0.85944	10.9175	14.3552		10	14.3552
Mammal	Sylvilagus	floridanus	Eastern Cotton-Tail	Femur	MidMax	Fem_MidMax	33	5	7.42	6.45576	0.510539	5.43468	7.47684		5	7.47684
Mammal	Sylvilagus	floridanus	Eastern Cotton-Tail	Femur	MidMin	Fem_MidMin	33	4	5.72	4.85242	0.388386	4.07565	5.6292		4	5.72
Mammal	Sylvilagus	floridanus	Eastern Cotton-Tail	Femur	FHD	Fem_FHD	33	5	6.9	6.19182	0.382634	5.42655	6.95709		5	6.95709
Mammal	Urocyon	cinereoargenteus	Grey Fox	Femur	MaxL	Fem_MaxL	41	94	123	114.374	5.90342	102.567	126.181		94	126.181
Mammal	Urocyon	cinereoargenteus	Grey Fox	Femur	MaxPD	Fem_MaxPD	34	10	14	12.3529	1.06976	10.2134	14.4925		10	14.4925
Mammal	Urocyon	cinereoargenteus	Grey Fox	Femur	MaxPW	Fem_MaxPW	34	17	24	21.9118	1.16431	19.5831	24.2404		17	24.2404
Mammal	Urocyon	cinereoargenteus	Grey Fox	Femur	MaxDD	Fem_MaxDD	33	14	24	20.4242	1.83763	16.749	24.0995		14	24.0995
Mammal	Urocyon	cinereoargenteus	Grey Fox	Femur	MaxDW	Fem_MaxDW	40	17	23	19.8455	1.32327	17.199	22.492		17	23
Mammal	Urocyon	cinereoargenteus	Grey Fox	Femur	MidMax	Fem_MidMax	33	7.47	10.23	8.76697	0.582846	7.60128	9.93266		7.47	10.23
Mammal	Urocyon	cinereoargenteus	Grey Fox	Femur	MidMin	Fem_MidMin	33	6	8.12	7.22273	0.569036	6.08466	8.3608		6	8.3608
Mammal	Urocyon	cinereoargenteus	Grey Fox	Femur	FHD	Fem_FHD	41	8.56	12	10.4746	0.709356	9.05592	11.8933		8.56	12
Mammal	Ursus	americanus	Black Bear	Femur	MaxL	Fem_MaxL	34	288.28	391.5	331.263	25.3488	280.565	381.96		280.565	391.5
Mammal	Ursus	americanus	Black Bear	Femur	MaxPD	Fem_MaxPD	11	33	44	40.0909	3.56243	32.966	47.2158		32.966	47.2158
Mammal	Ursus	americanus	Black Bear	Femur	MaxPW	Fem_MaxPW	11	61	90	76.4545	8.2869	59.8807	93.0283		59.8807	93.0283
Mammal	Ursus	americanus	Black Bear	Femur	MaxDD	Fem_MaxDD	11	47	58	53.7273	3.49545	46.7364	60.7182		46.7364	60.7182
Mammal	Ursus	americanus	Black Bear	Femur	MaxDW	Fem_MaxDW	33	55	85.2	64.3273	5.87424	52.5788	76.0758		52.5788	85.2
Mammal	Ursus	americanus	Black Bear	Femur	MidMax	Fem_MidMax	11	24.91	32.09	29.2882	2.8199	23.6484	34.928		23.6484	34.928
Mammal	Ursus	americanus	Black Bear	Femur	MidMin	Fem_MidMin	11	20.36	27	23.3927	2.08607	19.2206	27.5649		19.2206	27.5649
Mammal	Ursus	americanus	Black Bear	Femur	FHD	Fem_FHD	33	30.83	47.3	36.9933	3.10918	30.775	43.2117		30.775	47.3
Mammal	Ursus	arctos	Brown Bear	Femur	MaxL	Fem_MaxL	46	287	515	385.134	59.2225	266.689	503.579		266.689	515
Mammal	Ursus	arctos	Brown Bear	Femur	MaxPD	Fem_MaxPD	18	40	81	53.0556	11.1169	30.8218	75.2893		30.8218	81
Mammal	Ursus	arctos	Brown Bear	Femur	MaxPW	Fem_MaxPW	18	81	124	95.3333	12.4334	70.4666	120.2		70.4666	124
Mammal	Ursus	arctos	Brown Bear	Femur	MaxDD	Fem_MaxDD	18	55	86	67.5	8.12585	51.2483	83.7517		51.2483	86
Mammal	Ursus	arctos	Brown Bear	Femur	MaxDW	Fem_MaxDW	45	54.1	112	80.2169	14.4777	51.2616	109.172		51.2616	112
Mammal	Ursus	arctos	Brown Bear	Femur	MidMax	Fem_MidMax	18	26.22	51.07	34.5533	6.43846	21.6764	47.4302		21.6764	51.07
Mammal	Ursus	arctos	Brown Bear	Femur	MidMin	Fem_MidMin	18	22.1	42.94	27.7133	5.67586	16.3616	39.0651		16.3616	42.94
Mammal	Ursus	arctos	Brown Bear	Femur	FHD	Fem_FHD	44	31.03	61.73	45.2773	7.72064	29.836	60.7185		29.836	61.73
Mammal	Vulpes	vulpes	Red Fox	Femur	MaxL	Fem_MaxL	40	111	151	131.716	6.74043	118.235	145.197		111	151
Mammal	Vulpes	vulpes	Red Fox	Femur	MaxPD	Fem_MaxPD	35	10	16	12.9714	1.465	10.0414	15.9014		10	16
Mammal	Vulpes	vulpes	Red Fox	Femur	MaxPW	Fem_MaxPW	35	20	27	24.2571	1.68633	20.8845	27.6298		20	27.6298
Mammal	Vulpes	vulpes	Red Fox	Femur	MaxDD	Fem_MaxDD	36	18	24	21.4167	1.44173	18.5332	24.3001		18	24.3001
Mammal	Vulpes	vulpes	Red Fox	Femur	MaxDW	Fem_MaxDW	40	18	29	20.6578	1.73334	17.1911	24.1244		17.1911	29
Mammal	Vulpes	vulpes	Red Fox	Femur	MidMax	Fem_MidMax	35	7.93	10	9.08229	0.582091	7.9181	10.2465		7.9181	10.2465
Mammal	Vulpes	vulpes	Red Fox	Femur	MidMin	Fem_MidMin	35	6.56	9	7.89629	0.498675	6.89894	8.89364		6.56	9
Mammal	Vulpes	vulpes	Red Fox	Femur	FHD	Fem_FHD	40	10	13.65	11.7233	0.814895	10.0935	13.353		10	13.65
Bird	Aquila	chrysaetos	Golden Eagle	Femur	MaxL	Fem_MaxL	23	119	134	126.652	4.33389	117.984	135.32		117.984	135.32
Bird	Aquila	chrysaetos	Golden Eagle	Femur	MaxPD	Fem_MaxPD	23	15	26	20.3043	2.94549	14.4134	26.1953		14.4134	26.1953
Bird	Aquila	chrysaetos	Golden Eagle	Femur	MaxPW	Fem_MaxPW	23	24	32	27.913	2.3532	23.2066	32.6194		23.2066	32.6194
Bird	Aquila	chrysaetos	Golden Eagle	Femur	MaxDD	Fem_MaxDD	23	20	26	23.2609	1.76371	19.7335	26.7883		19.7335	26.7883
Bird	Aquila	chrysaetos	Golden Eagle	Femur	MaxDW	Fem_MaxDW	23	12.4	32	28.4087	3.87602	20.6566	36.1607		12.4	36.1607
Bird	Aquila	chrysaetos	Golden Eagle	Femur	MidMax	Fem_MidMax	23	11.94	15.25	13.3957	0.931318	11.533	15.2583		11.533	15.2583
Bird	Aquila	chrysaetos	Golden Eagle	Femur	MidMin	Fem_MidMin	23	11.13	13.47	12.23	0.765257	10.6995	13.7605		10.6995	13.7605
Bird	Aquila	chrysaetos	Golden Eagle	Femur	FHD	Fem_FHD	23	10.37	12.53	11.4665	0.695025	10.0765	12.8566		10.0765	12.8566
Turtle	Terrapene	carolina	Common Box Turtle	Femur	MaxL	Fem_MaxL	31	20	40	31.6129	4.18471	23.2435	39.9823		20	40
Turtle	Terrapene	carolina	Common Box Turtle	Femur	MaxPD	Fem_MaxPD	31	5	12	9.19355	1.42406	6.34542	12.0417		5	12.0417
Turtle	Terrapene	carolina	Common Box Turtle	Femur	MaxPW	Fem_MaxPW	31	5	9	6.96774	1.0483	4.87115	9.06433		4.87115	9.06433
Turtle	Terrapene	carolina	Common Box Turtle	Femur	MaxDD	Fem_MaxDD	31	3	8	5.40581	1.16997	3.06586	7.74575		3	8
Turtle	Terrapene	carolina	Common Box Turtle	Femur	MaxDW	Fem_MaxDW	31	5	9	7.01871	1.10094	4.81683	9.22059		4.81683	9.22059
Turtle	Terrapene	carolina	Common Box Turtle	Femur	MidMax	Fem_MidMax	31	2.37	4.92	3.56677	0.568849	2.42908	4.70447		2.37	4.92
Turtle	Terrapene	carolina	Common Box Turtle	Femur	MidMin	Fem_MidMin	31	1.93	5	2.98355	0.591589	1.80037	4.16673		1.80037	5
Turtle	Terrapene	carolina	Common Box Turtle	Femur	FHD	Fem_FHD	31	3.86	8.87	6.73129	1.09165	4.548	8.91458		3.86	8.91458
Turtle	Chelydra	serpentina	Common Snapping Turtle	Femur	MaxL	Fem_MaxL	30	22	91	54.2137	15.7429	22.7279	85.6994		22	91
Turtle	Chelydra	serpentina	Common Snapping Turtle	Femur	MaxPD	Fem_MaxPD	30	6.54	29	17.5473	5.42866	6.69002	28.4046		6.54	29
Turtle	Chelydra	serpentina	Common Snapping Turtle	Femur	MaxPW	Fem_MaxPW	30	6.75	30	16.8687	5.41047	6.04773	27.6896		6.04773	30
Turtle	Chelydra	serpentina	Common Snapping Turtle	Femur	MaxDD	Fem_MaxDD	30	4.35	19	10.661	3.60634	3.44832	17.8737		3.44832	19
Turtle	Chelydra	serpentina	Common Snapping Turtle	Femur	MaxDW	Fem_MaxDW	30	6.58	29	16.8443	5.0392	6.76594	26.9227		6.58	29
Turtle	Chelydra	serpentina	Common Snapping Turtle	Femur	MidMax	Fem_MidMax	30	2.95	10	6.60733	1.64876	3.30981	9.90486		2.95	10
Turtle	Chelydra	serpentina	Common Snapping Turtle	Femur	MidMin	Fem_MidMin	30	2.31	9	5.80667	1.58466	2.63735	8.97598		2.31	9
Turtle	Chelydra	serpentina	Common Snapping Turtle	Femur	FHD	Fem_FHD	30	3.67	17	9.34533	2.848	3.64934	15.0413		3.64934	17
Mammal	Homo	sapiens	Human	Femur	MaxL	Fem_MaxL	2630	343.75	549.5	432.824	32.9183	366.988	498.661		343.75	549.5
Mammal	Homo	sapiens	Human	Femur	MaxPD	Fem_MaxPD	89	37	59	46.0449	4.91267	36.2196	55.8703		36.2196	59
Mammal	Homo	sapiens	Human	Femur	MaxPW	Fem_MaxPW	89	71	105	87.4382	7.76202	71.9142	102.962		71	105
Mammal	Homo	sapiens	Human	Femur	MaxDD	Fem_MaxDD	89	46	92	63.3596	7.2992	48.7611	77.958		46	92
Mammal	Homo	sapiens	Human	Femur	MaxDW	Fem_MaxDW	2563	58	98	77.0574	6.39226	64.2728	89.8419		58	98
Mammal	Homo	sapiens	Human	Femur	MidMax	Fem_MidMax	457	14	39	27.4117	2.96944	21.4728	33.3506		14	39
Mammal	Homo	sapiens	Human	Femur	MidMin	Fem_MidMin	457	17.37	39	26.8125	3.09502	20.6225	33.0026		17.37	39
Mammal	Homo	sapiens	Human	Femur	FHD	Fem_FHD	1077	35.19	60.5	44.3869	3.90225	36.5824	52.1914		35.19	60.5

## Sheet: TableS3_Radius
Table S3. Descriptive statistics for radial measurements collected by species.
Class	Genus	Species	Common_Name	Bone	Measurement	Variable	Count	Min	Max	Ave	SD	SD2-	SD2+		Web_Min	Web_Max
Mammal	Alces	alces	Moose	Radius	MaxL	Rad_MaxL	4	298	427	344	59.9833	224.033	463.967		224.033	463.967
Mammal	Alces	alces	Moose	Radius	MaxPD	Rad_MaxPD	4	41	50	45.75	4.03113	37.6877	53.8123		37.6877	53.8123
Mammal	Alces	alces	Moose	Radius	MaxPW	Rad_MaxPW	20	61	83	73.9215	6.32185	61.2778	86.5652		61	86.5652
Mammal	Alces	alces	Moose	Radius	MaxDD	Rad_MaxDD	4	47	62	53.25	6.75154	39.7469	66.7531		39.7469	66.7531
Mammal	Alces	alces	Moose	Radius	MaxDW	Rad_MaxDW	20	61	84.75	71.2005	6.57076	58.059	84.342		58.059	84.75
Mammal	Alces	alces	Moose	Radius	MidMax	Rad_MidMax	4	28.76	48.11	35.6725	8.68856	18.2954	53.0496		18.2954	53.0496
Mammal	Alces	alces	Moose	Radius	MidMin	Rad_MidMin	4	19.95	34.04	25.2475	6.21769	12.8121	37.6829		12.8121	37.6829
Mammal	Anas	platyrhynchos	Mallard Duck	Radius	MaxL	Rad_MaxL	30	70	87	76.1667	4.97638	66.2139	86.1194		66.2139	87
Mammal	Anas	platyrhynchos	Mallard Duck	Radius	MaxPD	Rad_MaxPD	26	5	8	5.53846	0.811456	3.91555	7.16137		3.91555	8
Mammal	Anas	platyrhynchos	Mallard Duck	Radius	MaxPW	Rad_MaxPW	26	4	8	5.30769	0.837579	3.63253	6.98285		3.63253	8
Mammal	Anas	platyrhynchos	Mallard Duck	Radius	MaxDD	Rad_MaxDD	26	4	7	4.38462	0.752432	2.87975	5.88948		2.87975	7
Mammal	Anas	platyrhynchos	Mallard Duck	Radius	MaxDW	Rad_MaxDW	26	6	10	7.03846	0.99923	5.04	9.03692		5.04	10
Mammal	Anas	platyrhynchos	Mallard Duck	Radius	MidMax	Rad_MidMax	26	3.31	4.64	3.63654	0.319349	2.99784	4.27524		2.99784	4.64
Mammal	Anas	platyrhynchos	Mallard Duck	Radius	MidMin	Rad_MidMin	26	2.82	4.08	3.16	0.294061	2.57188	3.74812		2.57188	4.08
Mammal	Bos	taurus	Cow	Radius	MaxL	Rad_MaxL	4	265	322	292	24.8596	242.281	341.719		242.281	341.719
Mammal	Bos	taurus	Cow	Radius	MaxPD	Rad_MaxPD
Mammal	Bos	taurus	Cow	Radius	MaxPW	Rad_MaxPW	3	83	95	91	6.9282	77.1436	104.856		77.1436	104.856
Mammal	Bos	taurus	Cow	Radius	MaxDD	Rad_MaxDD
Mammal	Bos	taurus	Cow	Radius	MaxDW	Rad_MaxDW	2	72.2	88	80.1	11.1723	57.7554	102.445		57.7554	102.445
Mammal	Bos	taurus	Cow	Radius	MidMax	Rad_MidMax
Mammal	Bos	taurus	Cow	Radius	MidMin	Rad_MidMin
Mammal	Branta	canadensis	Canadian Goose	Radius	MaxL	Rad_MaxL	31	111	172	136.871	19.9094	97.0522	176.69		97.0522	176.69
Mammal	Branta	canadensis	Canadian Goose	Radius	MaxPD	Rad_MaxPD	31	7	11	8.6129	1.43009	5.75272	11.4731		5.75272	11.4731
Mammal	Branta	canadensis	Canadian Goose	Radius	MaxPW	Rad_MaxPW	31	6	10	7.58065	1.25895	5.06275	10.0985		5.06275	10.0985
Mammal	Branta	canadensis	Canadian Goose	Radius	MaxDD	Rad_MaxDD	32	3	9	5.125	1.15703	2.81095	7.43905		2.81095	9
Mammal	Branta	canadensis	Canadian Goose	Radius	MaxDW	Rad_MaxDW	32	8	14	10.0087	1.76851	6.47174	13.5458		6.47174	14
Mammal	Branta	canadensis	Canadian Goose	Radius	MidMax	Rad_MidMax	31	3.9	6.43	5.04258	0.810333	3.42191	6.66325		3.42191	6.66325
Mammal	Branta	canadensis	Canadian Goose	Radius	MidMin	Rad_MidMin	31	3.23	5.27	4.12774	0.650265	2.82721	5.42827		2.82721	5.42827
Mammal	Canis	familiaris	Dog	Radius	MaxL	Rad_MaxL	67	59.3	267	146.288	47.6849	50.9183	241.658		50.9183	267
Mammal	Canis	familiaris	Dog	Radius	MaxPD	Rad_MaxPD	33	7	22	12.6048	3.92846	4.74793	20.4618		4.74793	22
Mammal	Canis	familiaris	Dog	Radius	MaxPW	Rad_MaxPW	69	9.9	38	17.0774	5.54764	5.98211	28.1727		5.98211	38
Mammal	Canis	familiaris	Dog	Radius	MaxDD	Rad_MaxDD	33	7	21	14.0061	3.86668	6.2727	21.7394		6.2727	21.7394
Mammal	Canis	familiaris	Dog	Radius	MaxDW	Rad_MaxDW	69	12.9	38	22.4377	6.88919	8.65931	36.2161		8.65931	38
Mammal	Canis	familiaris	Dog	Radius	MidMax	Rad_MidMax	33	6.83	21.8	13.7715	4.21337	5.34478	22.1982		5.34478	22.1982
Mammal	Canis	familiaris	Dog	Radius	MidMin	Rad_MidMin	33	4.07	16.09	8.90727	3.23944	2.4284	15.3861		2.4284	16.09
Mammal	Canis	latrans	Coyote	Radius	MaxL	Rad_MaxL	46	139	189.72	163.289	10.2688	142.752	183.827		139	189.72
Mammal	Canis	latrans	Coyote	Radius	MaxPD	Rad_MaxPD	17	9	12	10.1747	0.807079	8.56055	11.7889		8.56055	12
Mammal	Canis	latrans	Coyote	Radius	MaxPW	Rad_MaxPW	28	13	18	15.7232	1.29586	13.1315	18.3149		13	18.3149
Mammal	Canis	latrans	Coyote	Radius	MaxDD	Rad_MaxDD	17	10	17	12.3071	2.08994	8.12718	16.4869		8.12718	17
Mammal	Canis	latrans	Coyote	Radius	MaxDW	Rad_MaxDW	28	18	29	23.2843	3.54619	16.1919	30.3767		16.1919	30.3767
Mammal	Canis	latrans	Coyote	Radius	MidMax	Rad_MidMax	28	8.89	16.69	11.2764	1.55648	8.16346	14.3894		8.16346	16.69
Mammal	Canis	latrans	Coyote	Radius	MidMin	Rad_MidMin	17	5.62	7.81	6.90765	0.646244	5.61516	8.20014		5.61516	8.20014
Mammal	Canis	lupus	Wolf	Radius	MaxL	Rad_MaxL	32	174.87	246.19	207.816	17.7104	172.395	243.237		172.395	246.19
Mammal	Canis	lupus	Wolf	Radius	MaxPD	Rad_MaxPD	22	14	20.06	16.425	1.47194	13.4811	19.3689		13.4811	20.06
Mammal	Canis	lupus	Wolf	Radius	MaxPW	Rad_MaxPW	28	19.39	30.17	22.7868	2.39414	17.9985	27.5751		17.9985	30.17
Mammal	Canis	lupus	Wolf	Radius	MaxDD	Rad_MaxDD	23	15	23.11	18.813	2.14263	14.5278	23.0983		14.5278	23.11
Mammal	Canis	lupus	Wolf	Radius	MaxDW	Rad_MaxDW	23	21.48	39.19	31.0148	3.72144	23.5719	38.4577		21.48	39.19
Mammal	Canis	lupus	Wolf	Radius	MidMax	Rad_MidMax	29	13.45	19.73	15.7545	1.69682	12.3608	19.1481		12.3608	19.73
Mammal	Canis	lupus	Wolf	Radius	MidMin	Rad_MidMin	22	9.03	12.69	10.5868	1.10051	8.3858	12.7878		8.3858	12.7878
Mammal	Cervus	canadensis/elaphus	Elk	Radius	MaxL	Rad_MaxL	4	312	338	327	11.1355	304.729	349.271		304.729	349.271
Mammal	Cervus	canadensis/elaphus	Elk	Radius	MaxPD	Rad_MaxPD	4	35	43	38	3.55903	30.8819	45.1181		30.8819	45.1181
Mammal	Cervus	canadensis/elaphus	Elk	Radius	MaxPW	Rad_MaxPW	4	63	71	67.5	3.41565	60.6687	74.3313		60.6687	74.3313
Mammal	Cervus	canadensis/elaphus	Elk	Radius	MaxDD	Rad_MaxDD	4	40.91	45	42.2275	1.91321	38.4011	46.0539		38.4011	46.0539
Mammal	Cervus	canadensis/elaphus	Elk	Radius	MaxDW	Rad_MaxDW	31	49	74	63.1935	5.19243	52.8087	73.5784		49	74
Mammal	Cervus	canadensis/elaphus	Elk	Radius	MidMax	Rad_MidMax	31	33.65	51.48	41.0919	4.84144	31.409	50.7748		31.409	51.48
Mammal	Cervus	canadensis/elaphus	Elk	Radius	MidMin	Rad_MidMin	4	18.8	21.14	19.9425	1.31439	17.3137	22.5713		17.3137	22.5713
Mammal	Didelphis	virginiana	Opossum	Radius	MaxL	Rad_MaxL	20	59	92	69.45	7.06716	55.3157	83.5843		55.3157	92
Mammal	Didelphis	virginiana	Opossum	Radius	MaxPD	Rad_MaxPD	19	4	7	5.19895	0.776616	3.64572	6.75218		3.64572	7
Mammal	Didelphis	virginiana	Opossum	Radius	MaxPW	Rad_MaxPW	19	4	10	6.13895	1.29191	3.55512	8.72278		3.55512	10
Mammal	Didelphis	virginiana	Opossum	Radius	MaxDD	Rad_MaxDD	19	5	9	6.29737	0.935188	4.42699	8.16774		4.42699	9
Mammal	Didelphis	virginiana	Opossum	Radius	MaxDW	Rad_MaxDW	20	6	12	7.757	1.60017	4.55665	10.9573		4.55665	12
Mammal	Didelphis	virginiana	Opossum	Radius	MidMax	Rad_MidMax	19	3.64	5.5	4.54789	0.523371	3.50115	5.59464		3.50115	5.59464
Mammal	Didelphis	virginiana	Opossum	Radius	MidMin	Rad_MidMin	19	3	4.33	3.59947	0.433352	2.73277	4.46618		2.73277	4.46618
Mammal	Equus	ferus/caballus	Horse	Radius	MaxL	Rad_MaxL	4	345	393	372.25	20.4512	331.348	413.152		331.348	413.152
Mammal	Equus	ferus/caballus	Horse	Radius	MaxPD	Rad_MaxPD
Mammal	Equus	ferus/caballus	Horse	Radius	MaxPW	Rad_MaxPW	3	91	118	103	13.7477	75.5045	130.495		75.5045	130.495
Mammal	Equus	ferus/caballus	Horse	Radius	MaxDD	Rad_MaxDD
Mammal	Equus	ferus/caballus	Horse	Radius	MaxDW	Rad_MaxDW
Mammal	Equus	ferus/caballus	Horse	Radius	MidMax	Rad_MidMax
Mammal	Equus	ferus/caballus	Horse	Radius	MidMin	Rad_MidMin
Mammal	Felis	catus	Cat	Radius	MaxL	Rad_MaxL	35	61.25	113.57	92.8906	9.90297	73.0846	112.697		61.25	113.57
Mammal	Felis	catus	Cat	Radius	MaxPD	Rad_MaxPD	35	4.25	7	5.43829	0.677445	4.08339	6.79318		4.08339	7
Mammal	Felis	catus	Cat	Radius	MaxPW	Rad_MaxPW	35	6	9.88	7.47857	1.0017	5.47518	9.48196		5.47518	9.88
Mammal	Felis	catus	Cat	Radius	MaxDD	Rad_MaxDD	29	6	9.21	7.2831	0.897612	5.48788	9.07833		5.48788	9.21
Mammal	Felis	catus	Cat	Radius	MaxDW	Rad_MaxDW	36	9.38	15	11.975	1.32011	9.33479	14.6152		9.33479	15
Mammal	Felis	catus	Cat	Radius	MidMax	Rad_MidMax	29	5	8	6.44621	0.664172	5.11786	7.77455		5	8
Mammal	Felis	catus	Cat	Radius	MidMin	Rad_MidMin	29	3	4.93	4.08172	0.469476	3.14277	5.02068		3	5.02068
Bird	Gallus	gallus	Chicken	Radius	MaxL	Rad_MaxL	24	44	85	68.375	10.4624	47.4502	89.2998		44	89.2998
Bird	Gallus	gallus	Chicken	Radius	MaxPD	Rad_MaxPD	24	3.75	7.27	5.67542	0.793616	4.08819	7.26265		3.75	7.27
Bird	Gallus	gallus	Chicken	Radius	MaxPW	Rad_MaxPW	24	3.61	7.7	5.83958	0.998227	3.84313	7.83604		3.61	7.83604
Bird	Gallus	gallus	Chicken	Radius	MaxDD	Rad_MaxDD	24	2.73	6	4.08792	0.81468	2.45856	5.71728		2.45856	6
Bird	Gallus	gallus	Chicken	Radius	MaxDW	Rad_MaxDW	24	3.2	9.23	6.97542	1.36449	4.24643	9.7044		3.2	9.7044
Bird	Gallus	gallus	Chicken	Radius	MidMax	Rad_MidMax	24	2.29	4.79	3.70375	0.564622	2.57451	4.83299		2.29	4.83299
Bird	Gallus	gallus	Chicken	Radius	MidMin	Rad_MidMin	24	1.78	3.77	2.82375	0.458379	1.90699	3.74051		1.78	3.77
Bird	Meleagris	gallopavo	Turkey	Radius	MaxL	Rad_MaxL	32	97	140	122.875	12.674	97.5271	148.223		97	148.223
Bird	Meleagris	gallopavo	Turkey	Radius	MaxPD	Rad_MaxPD	32	6	12	9.875	1.43122	7.01256	12.7374		6	12.7374
Bird	Meleagris	gallopavo	Turkey	Radius	MaxPW	Rad_MaxPW	32	7	12	9.375	1.2115	6.95199	11.798		6.95199	12
Bird	Meleagris	gallopavo	Turkey	Radius	MaxDD	Rad_MaxDD	32	4	10	7.03125	1.28225	4.46676	9.59574		4	10
Bird	Meleagris	gallopavo	Turkey	Radius	MaxDW	Rad_MaxDW	32	10	15	12.2812	1.30098	9.6793	14.8832		9.6793	15
Bird	Meleagris	gallopavo	Turkey	Radius	MidMax	Rad_MidMax	32	4.62	7.17	5.76281	0.707185	4.34844	7.17718		4.34844	7.17718
Bird	Meleagris	gallopavo	Turkey	Radius	MidMin	Rad_MidMin	32	3.75	5.52	4.72406	0.498442	3.72718	5.72095		3.72718	5.72095
Mammal	Odocoileus	hemionus	Mule Deer	Radius	MaxL	Rad_MaxL	17	197	250	223.176	19.7934	183.59	262.763		183.59	262.763
Mammal	Odocoileus	hemionus	Mule Deer	Radius	MaxPD	Rad_MaxPD	17	19	28	23.0588	2.33106	18.3967	27.7209		18.3967	28
Mammal	Odocoileus	hemionus	Mule Deer	Radius	MaxPW	Rad_MaxPW	34	30	46	38.9271	3.8389	31.2493	46.6049		30	46.6049
Mammal	Odocoileus	hemionus	Mule Deer	Radius	MaxDD	Rad_MaxDD	17	22	34	27.4706	3.1646	21.1414	33.7998		21.1414	34
Mammal	Odocoileus	hemionus	Mule Deer	Radius	MaxDW	Rad_MaxDW	34	29	43	36.0482	3.64339	28.7615	43.335		28.7615	43.335
Mammal	Odocoileus	hemionus	Mule Deer	Radius	MidMax	Rad_MidMax	34	15.82	30.1	22.9974	3.42089	16.1556	29.8391		15.82	30.1
Mammal	Odocoileus	hemionus	Mule Deer	Radius	MidMin	Rad_MidMin	17	10.44	29.68	14.47	4.35032	5.76936	23.1706		5.76936	29.68
Mammal	Odocoileus	virginianus	White-Tailed Deer	Radius	MaxL	Rad_MaxL	9	168	221	203.667	15.4758	172.715	234.618		168	234.618
Mammal	Odocoileus	virginianus	White-Tailed Deer	Radius	MaxPD	Rad_MaxPD	8	18	27	22.5938	2.73188	17.13	28.0575		17.13	28.0575
Mammal	Odocoileus	virginianus	White-Tailed Deer	Radius	MaxPW	Rad_MaxPW	8	30	37.02	33.7525	2.25611	29.2403	38.2647		29.2403	38.2647
Mammal	Odocoileus	virginianus	White-Tailed Deer	Radius	MaxDD	Rad_MaxDD	8	22	28	24.8125	2.35944	20.0936	29.5314		20.0936	29.5314
Mammal	Odocoileus	virginianus	White-Tailed Deer	Radius	MaxDW	Rad_MaxDW	8	25	39	32.3325	4.32387	23.6848	40.9802		23.6848	40.9802
Mammal	Odocoileus	virginianus	White-Tailed Deer	Radius	MidMax	Rad_MidMax	8	17.5	24	21.6775	2.20375	17.27	26.085		17.27	26.085
Mammal	Odocoileus	virginianus	White-Tailed Deer	Radius	MidMin	Rad_MidMin	7	9.77	20.94	14.2229	3.36934	7.48418	20.9615		7.48418	20.9615
Mammal	Ovis	aries	Sheep	Radius	MaxL	Rad_MaxL	81	125	184.3	146.091	14.1494	117.792	174.39		117.792	184.3
Mammal	Ovis	aries	Sheep	Radius	MaxPD	Rad_MaxPD	61	12.6	20.8	15.8492	1.85343	12.1423	19.556		12.1423	20.8
Mammal	Ovis	aries	Sheep	Radius	MaxPW	Rad_MaxPW	88	22.8	38.9	30.9943	3.24531	24.5037	37.4849		22.8	38.9
Mammal	Ovis	aries	Sheep	Radius	MaxDD	Rad_MaxDD	3	20	22	21.3333	1.1547	19.0239	23.6427		19.0239	23.6427
Mammal	Ovis	aries	Sheep	Radius	MaxDW	Rad_MaxDW	8	25	36	31.375	3.96187	23.4513	39.2987		23.4513	39.2987
Mammal	Ovis	aries	Sheep	Radius	MidMax	Rad_MidMax	8	11.38	22.05	17.6037	3.63109	10.3416	24.8659		10.3416	24.8659
Mammal	Ovis	aries	Sheep	Radius	MidMin	Rad_MidMin	3	7.96	10.93	9.54667	1.4954	6.55586	12.5375		6.55586	12.5375
Mammal	Capra	hircus	Goat	Radius	MaxL	Rad_MaxL	56	141.8	209.7	172.655	15.2947	142.066	203.245		141.8	209.7
Mammal	Capra	hircus	Goat	Radius	MaxPD	Rad_MaxPD	70	13.9	23.7	17.1757	1.79479	13.5861	20.7653		13.5861	23.7
Mammal	Capra	hircus	Goat	Radius	MaxPW	Rad_MaxPW	73	28	42.4	33.237	3.2251	26.7868	39.6872		26.7868	42.4
Mammal	Capra	hircus	Goat	Radius	MaxDD	Rad_MaxDD
Mammal	Capra	hircus	Goat	Radius	MaxDW	Rad_MaxDW	9	27.62	38.92	31.6644	3.71276	24.2389	39.09		24.2389	39.09
Mammal	Capra	hircus	Goat	Radius	MidMax	Rad_MidMax	3	18.84	24.2	21.2533	2.71951	15.8143	26.6924		15.8143	26.6924
Mammal	Capra	hircus	Goat	Radius	MidMin	Rad_MidMin
Mammal	Ovis/Capra	aries/aegagrus	Sheep/Goat	Radius	MaxL	Rad_MaxL	138	125	209.7	156.827	19.5816	117.664	195.99		117.664	209.7
Mammal	Ovis/Capra	aries/aegagrus	Sheep/Goat	Radius	MaxPD	Rad_MaxPD	132	12.6	23.7	16.5614	1.92598	12.7094	20.4133		12.6	23.7
Mammal	Ovis/Capra	aries/aegagrus	Sheep/Goat	Radius	MaxPW	Rad_MaxPW	162	22.8	42.4	32.0173	3.40518	25.2069	38.8276		22.8	42.4
Mammal	Ovis/Capra	aries/aegagrus	Sheep/Goat	Radius	MaxDD	Rad_MaxDD	5	20	24.8	21.96	1.79109	18.3778	25.5422		18.3778	25.5422
Mammal	Ovis/Capra	aries/aegagrus	Sheep/Goat	Radius	MaxDW	Rad_MaxDW	18	25	38.92	31.4989	3.60367	24.2915	38.7062		24.2915	38.92
Mammal	Ovis/Capra	aries/aegagrus	Sheep/Goat	Radius	MidMax	Rad_MidMax	12	11.38	24.2	18.6325	3.51998	11.5925	25.6725		11.38	25.6725
Mammal	Ovis/Capra	aries/aegagrus	Sheep/Goat	Radius	MidMin	Rad_MidMin	4	7.96	10.93	9.41	1.25121	6.90757	11.9124		6.90757	11.9124
Mammal	Procyon	lotor	Raccoon	Radius	MaxL	Rad_MaxL	32	84	113.07	99.6634	7.72626	84.2109	115.116		84	115.116
Mammal	Procyon	lotor	Raccoon	Radius	MaxPD	Rad_MaxPD	26	5	9	6.81038	0.853466	5.10345	8.51732		5	9
Mammal	Procyon	lotor	Raccoon	Radius	MaxPW	Rad_MaxPW	26	8	12	9.61923	0.904221	7.81079	11.4277		7.81079	12
Mammal	Procyon	lotor	Raccoon	Radius	MaxDD	Rad_MaxDD	26	6	10	8.12846	1.08382	5.96083	10.2961		5.96083	10.2961
Mammal	Procyon	lotor	Raccoon	Radius	MaxDW	Rad_MaxDW	28	10	14.14	11.9693	1.01019	9.9489	13.9897		9.9489	14.14
Mammal	Procyon	lotor	Raccoon	Radius	MidMax	Rad_MidMax	29	3.78	6.47	5.31069	0.716579	3.87753	6.74385		3.78	6.74385
Mammal	Procyon	lotor	Raccoon	Radius	MidMin	Rad_MidMin	26	3.6	5.48	4.34615	0.452964	3.44023	5.25208		3.44023	5.48
Mammal	Sus	scrofa	Pig	Radius	MaxL	Rad_MaxL	4	137	188	167.25	24.3772	118.496	216.004		118.496	216.004
Mammal	Sus	scrofa	Pig	Radius	MaxPD	Rad_MaxPD	3	20	41	27.6667	11.5902	4.48622	50.8471		15	50.8471
Mammal	Sus	scrofa	Pig	Radius	MaxPW	Rad_MaxPW	7	28	51	35.3429	7.77321	19.7964	50.8893		19.7964	51
Mammal	Sus	scrofa	Pig	Radius	MaxDD	Rad_MaxDD	4	28	39.7	31.425	5.59665	20.2317	42.6183		20.2317	42.6183
Mammal	Sus	scrofa	Pig	Radius	MaxDW	Rad_MaxDW	7	35	51.7	42.3857	5.32367	31.7384	53.033		31.7384	53.033
Mammal	Sus	scrofa	Pig	Radius	MidMax	Rad_MidMax	7	18.28	34	23.7243	6.16748	11.3893	36.0592		13	36.0592
Mammal	Sus	scrofa	Pig	Radius	MidMin	Rad_MidMin	3	12.31	22	16.7	4.90868	6.88265	26.5174		6.88265	26.5174
Mammal	Sylvilagus	floridanus	Eastern Cotton-Tail	Radius	MaxL	Rad_MaxL	5	52	64	57.4	4.97996	47.4401	67.3599		47.4401	67.3599
Mammal	Sylvilagus	floridanus	Eastern Cotton-Tail	Radius	MaxPD	Rad_MaxPD	4	2	4	3.4	0.95219	1.49562	5.30438		1.49562	5.30438
Mammal	Sylvilagus	floridanus	Eastern Cotton-Tail	Radius	MaxPW	Rad_MaxPW	4	5	6	5.345	0.471982	4.40104	6.28896		4.40104	6.28896
Mammal	Sylvilagus	floridanus	Eastern Cotton-Tail	Radius	MaxDD	Rad_MaxDD	4	3	4	3.42	0.502262	2.41548	4.42452		2.41548	4.42452
Mammal	Sylvilagus	floridanus	Eastern Cotton-Tail	Radius	MaxDW	Rad_MaxDW	4	4.66	5	4.915	0.17	4.575	5.255		4.575	5.255
Mammal	Sylvilagus	floridanus	Eastern Cotton-Tail	Radius	MidMax	Rad_MidMax	4	3	4	3.5525	0.436759	2.67898	4.42602		2.67898	4.42602
Mammal	Sylvilagus	floridanus	Eastern Cotton-Tail	Radius	MidMin	Rad_MidMin	4	1.91	3	2.2875	0.495	1.2975	3.2775		1.2975	3.2775
Mammal	Urocyon	cinereoargenteus	Grey Fox	Radius	MaxL	Rad_MaxL	27	80.49	102	93.8648	5.66837	82.5281	105.202		80.49	105.202
Mammal	Urocyon	cinereoargenteus	Grey Fox	Radius	MaxPD	Rad_MaxPD	20	5	7	6.1	0.447214	5.20557	6.99443		5	7
Mammal	Urocyon	cinereoargenteus	Grey Fox	Radius	MaxPW	Rad_MaxPW	32	7.46	11	9.39937	0.712501	7.97437	10.8244		7.46	11
Mammal	Urocyon	cinereoargenteus	Grey Fox	Radius	MaxDD	Rad_MaxDD	20	7	10	7.7	0.864505	5.97099	9.42901		5.97099	10
Mammal	Urocyon	cinereoargenteus	Grey Fox	Radius	MaxDW	Rad_MaxDW	31	8.97	19	13.6223	2.39277	8.83672	18.4078		8.83672	19
Mammal	Urocyon	cinereoargenteus	Grey Fox	Radius	MidMax	Rad_MidMax	31	5.13	8	6.69839	0.639855	5.41868	7.9781		5.13	8
Mammal	Urocyon	cinereoargenteus	Grey Fox	Radius	MidMin	Rad_MidMin	20	3.88	5.19	4.473	0.372941	3.72712	5.21888		3.72712	5.21888
Mammal	Ursus	americanus	Black Bear	Radius	MaxL	Rad_MaxL	18	145	277.02	247.977	30.2307	187.516	308.439		145	308.439
Mammal	Ursus	americanus	Black Bear	Radius	MaxPD	Rad_MaxPD	13	25	33.92	29.0708	3.21638	22.638	35.5035		22.638	35.5035
Mammal	Ursus	americanus	Black Bear	Radius	MaxPW	Rad_MaxPW	13	27	36	31.3362	2.76448	25.8072	36.8651		25.8072	36.8651
Mammal	Ursus	americanus	Black Bear	Radius	MaxDD	Rad_MaxDD	13	24	35	30.2754	3.1753	23.9248	36.626		23.9248	36.626
Mammal	Ursus	americanus	Black Bear	Radius	MaxDW	Rad_MaxDW	13	39	51	46.6731	3.22972	40.2136	53.1325		39	53.1325
Mammal	Ursus	americanus	Black Bear	Radius	MidMax	Rad_MidMax	13	18.19	36	22.9877	4.91028	13.1671	32.8083		13.1671	36
Mammal	Ursus	americanus	Black Bear	Radius	MidMin	Rad_MidMin	13	12.11	16.67	14.5069	1.38837	11.7302	17.2837		11.7302	17.2837
Mammal	Ursus	arctos	Brown Bear	Radius	MaxL	Rad_MaxL	18	241	351	291.123	28.9155	233.292	348.954		233.292	351
Mammal	Ursus	arctos	Brown Bear	Radius	MaxPD	Rad_MaxPD	14	27.85	50	38.1321	5.78312	26.5659	49.6984		26.5659	50
Mammal	Ursus	arctos	Brown Bear	Radius	MaxPW	Rad_MaxPW	14	33	49	38.9107	4.4631	29.9845	47.8369		29.9845	49
Mammal	Ursus	arctos	Brown Bear	Radius	MaxDD	Rad_MaxDD	14	28.14	55	37.5814	6.75259	24.0763	51.0866		24.0763	55
Mammal	Ursus	arctos	Brown Bear	Radius	MaxDW	Rad_MaxDW	14	47.98	70	58.4986	6.8832	44.7322	72.265		44.7322	72.265
Mammal	Ursus	arctos	Brown Bear	Radius	MidMax	Rad_MidMax	14	22.72	40.79	29.4264	4.88257	19.6613	39.1916		19.6613	40.79
Mammal	Ursus	arctos	Brown Bear	Radius	MidMin	Rad_MidMin	14	12.55	26.36	17.3407	3.80294	9.73483	24.9466		9.73483	26.36
Mammal	Vulpes	vulpes	Red Fox	Radius	MaxL	Rad_MaxL	23	90	126	117.034	8.91741	99.1995	134.869		90	134.869
Mammal	Vulpes	vulpes	Red Fox	Radius	MaxPD	Rad_MaxPD	19	6	9	7.15789	0.898342	5.36121	8.95458		5.36121	9
Mammal	Vulpes	vulpes	Red Fox	Radius	MaxPW	Rad_MaxPW	37	8.97	12	10.563	0.802163	8.95865	12.1673		8.95865	12.1673
Mammal	Vulpes	vulpes	Red Fox	Radius	MaxDD	Rad_MaxDD	19	7	10	8.26316	0.653376	6.95641	9.56991		6.95641	10
Mammal	Vulpes	vulpes	Red Fox	Radius	MaxDW	Rad_MaxDW	24	5	20	15.1433	2.7326	9.67813	20.6085		5	20.6085
Mammal	Vulpes	vulpes	Red Fox	Radius	MidMax	Rad_MidMax	37	5	9.42	7.62649	0.997826	5.63083	9.62214		5	9.62214
Mammal	Vulpes	vulpes	Red Fox	Radius	MidMin	Rad_MidMin	19	4	9	4.92	1.05341	2.81318	7.02682		2.81318	9
Bird	Aquila	chrysaetos	Golden Eagle	Radius	MaxL	Rad_MaxL	16	189	215	203.125	9.1278	184.869	221.381		184.869	221.381
Bird	Aquila	chrysaetos	Golden Eagle	Radius	MaxPD	Rad_MaxPD	16	7	13	9.5625	1.54785	6.4668	12.6582		6.4668	13
Bird	Aquila	chrysaetos	Golden Eagle	Radius	MaxPW	Rad_MaxPW	16	7	12	10.1875	1.22304	7.74141	12.6336		7	12.6336
Bird	Aquila	chrysaetos	Golden Eagle	Radius	MaxDD	Rad_MaxDD	16	8	10	9.3125	0.704154	7.90419	10.7208		7.90419	10.7208
Bird	Aquila	chrysaetos	Golden Eagle	Radius	MaxDW	Rad_MaxDW	16	13	16	14.5	0.730297	13.0394	15.9606		13	16
Bird	Aquila	chrysaetos	Golden Eagle	Radius	MidMax	Rad_MidMax	16	5.77	7.28	6.435	0.452003	5.53099	7.33901		5.53099	7.33901
Bird	Aquila	chrysaetos	Golden Eagle	Radius	MidMin	Rad_MidMin	16	5.04	6.14	5.5975	0.322087	4.95333	6.24167		4.95333	6.24167
Turtle	Terrapene	carolina	Common Box Turtle	Radius	MaxL	Rad_MaxL	27	12	22	17.4237	2.31749	12.7887	22.0587		12	22.0587
Turtle	Terrapene	carolina	Common Box Turtle	Radius	MaxPD	Rad_MaxPD	27	1.91	3.78	2.55704	0.4511	1.65484	3.45924		1.65484	3.78
Turtle	Terrapene	carolina	Common Box Turtle	Radius	MaxPW	Rad_MaxPW	27	2.58	5.13	3.80704	0.548521	2.70999	4.90408		2.58	5.13
Turtle	Terrapene	carolina	Common Box Turtle	Radius	MaxDD	Rad_MaxDD	27	1.53	3.31	2.19296	0.385295	1.42237	2.96355		1.42237	3.31
Turtle	Terrapene	carolina	Common Box Turtle	Radius	MaxDW	Rad_MaxDW	27	3.87	6.27	4.76111	0.676895	3.40732	6.1149		3.40732	6.27
Turtle	Terrapene	carolina	Common Box Turtle	Radius	MidMax	Rad_MidMax	27	1.23	2.02	1.69926	0.203014	1.29323	2.10529		1.23	2.10529
Turtle	Terrapene	carolina	Common Box Turtle	Radius	MidMin	Rad_MidMin	27	1	1.69	1.4	0.195094	1.00981	1.79019		1	1.79019
Turtle	Chelydra	serpentina	Common Snapping Turtle	Radius	MaxL	Rad_MaxL	30	12.06	50	29.2613	8.48448	12.2924	46.2303		12.06	50
Turtle	Chelydra	serpentina	Common Snapping Turtle	Radius	MaxPD	Rad_MaxPD	30	2.94	12	6.86833	1.94873	2.97087	10.7658		2.94	12
Turtle	Chelydra	serpentina	Common Snapping Turtle	Radius	MaxPW	Rad_MaxPW	30	2.61	13	5.18367	2.03829	1.10709	9.26024		1.10709	13
Turtle	Chelydra	serpentina	Common Snapping Turtle	Radius	MaxDD	Rad_MaxDD	30	2	7	4.048	1.19078	1.66643	6.42957		1.66643	7
Turtle	Chelydra	serpentina	Common Snapping Turtle	Radius	MaxDW	Rad_MaxDW	30	4.16	18	10.9087	3.06577	4.77713	17.0402		4.16	18
Turtle	Chelydra	serpentina	Common Snapping Turtle	Radius	MidMax	Rad_MidMax	30	1.51	5.25	3.44767	0.869937	1.70779	5.18754		1.51	5.25
Turtle	Chelydra	serpentina	Common Snapping Turtle	Radius	MidMin	Rad_MidMin	30	1	5	2.87533	0.831831	1.21167	4.539		1	5
Mammal	Homo	sapiens	Human	Radius	MaxL	Rad_MaxL	2531	179.5	309.25	236.018	19.8024	196.413	275.623		179.5	309.25
Mammal	Homo	sapiens	Human	Radius	MaxPD	Rad_MaxPD	380	15	31	22.7157	2.42342	17.8688	27.5625		15	31
Mammal	Homo	sapiens	Human	Radius	MaxPW	Rad_MaxPW	380	15	31	22.5793	2.44137	17.6966	27.4621		15	31
Mammal	Homo	sapiens	Human	Radius	MaxDD	Rad_MaxDD	89	16.5	36	24.5674	3.76602	17.0354	32.0995		16.5	36
Mammal	Homo	sapiens	Human	Radius	MaxDW	Rad_MaxDW	89	20.5	42	32.7135	3.97141	24.7707	40.6563		20.5	42
Mammal	Homo	sapiens	Human	Radius	MidMax	Rad_MidMax	454	10	20.5	15.5386	1.87596	11.7866	19.2905		10	20.5
Mammal	Homo	sapiens	Human	Radius	MidMin	Rad_MidMin	453	7.7	16	11.8717	1.53554	8.8006	14.9428		7.7	16

## Sheet: TableS4_Radio-Ulna
Table S4. Descriptive statistics for radio-ulnar measurements collected by species.
Class	Genus	Species	Common_Name	Bone	Measurement	Variable	Count	Min	Max	Ave	SD	SD2-	SD2+		Web_Min	Web_Max
Mammal	Alces	alces	Moose	RadUln	MaxL	RadUln_MaxL	17	377	557	489.647	49.7857	390.076	589.218		377	589.218
Mammal	Alces	alces	Moose	RadUln	MaxPD	RadUln_PD	15	56.69	87.33	72.5	9.40067	53.6987	91.3013		53.6987	91.3013
Mammal	Alces	alces	Moose	RadUln	MaxPW	RadUln_MaxPW	20	61	83	73.9215	6.32185	61.2778	86.5652		61	86.5652
Mammal	Alces	alces	Moose	RadUln	MaxDD	RadUln_MaxDD	16	52	80.14	64.6531	8.20471	48.2437	81.0625		48.2437	81.0625
Mammal	Alces	alces	Moose	RadUln	MaxDW	RadUln_MaxDW	20	61	84.75	71.2005	6.57076	58.059	84.342		58.059	84.75
Mammal	Alces	alces	Moose	RadUln	MidMax	RadUln_MidAPD	16	31.45	54.15	44.5931	7.01326	30.5666	58.6197		30.5666	58.6197
Mammal	Alces	alces	Moose	RadUln	MidMin	RadUln_MidMLW	16	29.65	55.74	44.6056	7.60404	29.3975	59.8137		29.3975	59.8137
Mammal	Anas	platyrhynchos	Mallard Duck	RadUln	MaxL	RadUln_MaxL	5	77	87	81.6	4.97996	71.6401	91.5599		71.6401	91.5599
Mammal	Anas	platyrhynchos	Mallard Duck	RadUln	MaxPD	RadUln_PD
Mammal	Anas	platyrhynchos	Mallard Duck	RadUln	MaxPW	RadUln_MaxPW	5	8	10	9.2	0.83666	7.52668	10.8733		7.52668	10.8733
Mammal	Anas	platyrhynchos	Mallard Duck	RadUln	MaxDD	RadUln_MaxDD	5	11	17	13	2.54951	7.90098	18.099		7.90098	18.099
Mammal	Anas	platyrhynchos	Mallard Duck	RadUln	MaxDW	RadUln_MaxDW	5	8	17.17	10.434	3.85575	2.72251	18.1455		2.72251	18.1455
Mammal	Anas	platyrhynchos	Mallard Duck	RadUln	MidMax	RadUln_MidAPD	5	11.46	15.67	13.968	1.60794	10.7521	17.1839		10.7521	17.1839
Mammal	Anas	platyrhynchos	Mallard Duck	RadUln	MidMin	RadUln_MidMLW	5	4.99	5.67	5.282	0.302275	4.67745	5.88655		4.67745	5.88655
Mammal	Bos	taurus	Cow	RadUln	MaxL	RadUln_MaxL	12	312	482	411.333	58.4813	294.371	528.296		294.371	528.296
Mammal	Bos	taurus	Cow	RadUln	MaxPD	RadUln_PD	9	49.16	98.05	76.8711	16.2534	44.3643	109.378		44.3643	109.378
Mammal	Bos	taurus	Cow	RadUln	MaxPW	RadUln_MaxPW	12	62	122	93.9167	18.2779	57.3608	130.473		57.3608	130.473
Mammal	Bos	taurus	Cow	RadUln	MaxDD	RadUln_MaxDD	12	38	75	58.3333	10.2277	37.8779	78.7888		37.8779	78.7888
Mammal	Bos	taurus	Cow	RadUln	MaxDW	RadUln_MaxDW	13	58	112	87.6308	17.5235	52.5838	122.678		52.5838	122.678
Mammal	Bos	taurus	Cow	RadUln	MidMax	RadUln_MidAPD	10	23.76	66.82	47.678	13.4	20.878	74.478		20.878	74.478
Mammal	Bos	taurus	Cow	RadUln	MidMin	RadUln_MidMLW	9	35.37	75.89	54.4089	12.1229	30.1631	78.6547		30.1631	78.6547
Mammal	Branta	canadensis	Canadian Goose	RadUln	MaxL	RadUln_MaxL
Mammal	Branta	canadensis	Canadian Goose	RadUln	MaxPD	RadUln_PD
Mammal	Branta	canadensis	Canadian Goose	RadUln	MaxPW	RadUln_MaxPW
Mammal	Branta	canadensis	Canadian Goose	RadUln	MaxDD	RadUln_MaxDD
Mammal	Branta	canadensis	Canadian Goose	RadUln	MaxDW	RadUln_MaxDW
Mammal	Branta	canadensis	Canadian Goose	RadUln	MidMax	RadUln_MidAPD
Mammal	Branta	canadensis	Canadian Goose	RadUln	MidMin	RadUln_MidMLW
Mammal	Canis	familiaris	Dog	RadUln	MaxL	RadUln_MaxL
Mammal	Canis	familiaris	Dog	RadUln	MaxPD	RadUln_PD
Mammal	Canis	familiaris	Dog	RadUln	MaxPW	RadUln_MaxPW
Mammal	Canis	familiaris	Dog	RadUln	MaxDD	RadUln_MaxDD
Mammal	Canis	familiaris	Dog	RadUln	MaxDW	RadUln_MaxDW
Mammal	Canis	familiaris	Dog	RadUln	MidMax	RadUln_MidAPD
Mammal	Canis	familiaris	Dog	RadUln	MidMin	RadUln_MidMLW
Mammal	Canis	latrans	Coyote	RadUln	MaxL	RadUln_MaxL	11	175	215	195.182	10.5624	174.057	216.307		174.057	216.307
Mammal	Canis	latrans	Coyote	RadUln	MaxPD	RadUln_PD	11	19.64	24.65	22.5918	1.56873	19.4544	25.7293		19.4544	25.7293
Mammal	Canis	latrans	Coyote	RadUln	MaxPW	RadUln_MaxPW	11	14.82	17.85	16.4445	1.00903	14.4265	18.4626		14.4265	18.4626
Mammal	Canis	latrans	Coyote	RadUln	MaxDD	RadUln_MaxDD	11	11	15	13.1409	1.30706	10.5268	15.755		10.5268	15.755
Mammal	Canis	latrans	Coyote	RadUln	MaxDW	RadUln_MaxDW	11	24	29	27.18	1.77663	23.6267	30.7333		23.6267	30.7333
Mammal	Canis	latrans	Coyote	RadUln	MidMax	RadUln_MidAPD	11	13.2	18.75	16.9018	1.74227	13.4173	20.3864		13.2	20.3864
Mammal	Canis	latrans	Coyote	RadUln	MidMin	RadUln_MidMLW	11	8.89	16.69	10.9118	2.13632	6.63918	15.1845		6.63918	16.69
Mammal	Canis	lupus	Wolf	RadUln	MaxL	RadUln_MaxL	6	213.75	259.34	233.462	17.2561	198.949	267.974		198.949	267.974
Mammal	Canis	lupus	Wolf	RadUln	MaxPD	RadUln_PD	6	28.07	32.76	30.3233	1.64725	27.0288	33.6178		27.0288	33.6178
Mammal	Canis	lupus	Wolf	RadUln	MaxPW	RadUln_MaxPW	6	19.56	22.72	21.21	1.28142	18.6472	23.7728		18.6472	23.7728
Mammal	Canis	lupus	Wolf	RadUln	MaxDD	RadUln_MaxDD	6	16.67	19.85	18.05	1.08298	15.884	20.216		15.884	20.216
Mammal	Canis	lupus	Wolf	RadUln	MaxDW	RadUln_MaxDW	6	36.26	38.64	37.4017	0.952374	35.4969	39.3064		35.4969	39.3064
Mammal	Canis	lupus	Wolf	RadUln	MidMax	RadUln_MidAPD	6	23.07	25.16	24.0417	0.769894	22.5019	25.5815		22.5019	25.5815
Mammal	Canis	lupus	Wolf	RadUln	MidMin	RadUln_MidMLW	6	13.59	14.45	14.1033	0.310977	13.4814	14.7253		13.4814	14.7253
Mammal	Cervus	canadensis/elaphus	Elk	RadUln	MaxL	RadUln_MaxL	30	346	459	416.867	27.9528	360.961	472.772		346	472.772
Mammal	Cervus	canadensis/elaphus	Elk	RadUln	MaxPD	RadUln_PD	31	49.63	71.43	60.5671	5.60849	49.3501	71.7841		49.3501	71.7841
Mammal	Cervus	canadensis/elaphus	Elk	RadUln	MaxPW	RadUln_MaxPW	30	35.59	78	66.2173	11.213	43.7914	88.6433		35.59	88.6433
Mammal	Cervus	canadensis/elaphus	Elk	RadUln	MaxDD	RadUln_MaxDD	27	37	61	49.8519	5.28935	39.2732	60.4305		37	61
Mammal	Cervus	canadensis/elaphus	Elk	RadUln	MaxDW	RadUln_MaxDW	31	49	74	63.1935	5.19243	52.8087	73.5784		49	74
Mammal	Cervus	canadensis/elaphus	Elk	RadUln	MidMax	RadUln_MidAPD	27	25.64	47.25	37.8307	5.78943	26.2519	49.4096		25.64	49.4096
Mammal	Cervus	canadensis/elaphus	Elk	RadUln	MidMin	RadUln_MidMLW	31	33.65	51.48	41.0919	4.84144	31.409	50.7748		31.409	51.48
Mammal	Didelphis	virginiana	Opossum	RadUln	MaxL	RadUln_MaxL	33	68	93	80.9658	6.47306	68.0196	93.9119		68	93.9119
Mammal	Didelphis	virginiana	Opossum	RadUln	MaxPD	RadUln_PD	32	7.11	11.59	9.20656	1.24674	6.71309	11.7		6.71309	11.7
Mammal	Didelphis	virginiana	Opossum	RadUln	MaxPW	RadUln_MaxPW	16	5.72	12	9.29625	1.87294	5.55038	13.0421		5.55038	13.0421
Mammal	Didelphis	virginiana	Opossum	RadUln	MaxDD	RadUln_MaxDD	14	6	8.11	6.85571	0.565287	5.72514	7.98629		5.72514	8.11
Mammal	Didelphis	virginiana	Opossum	RadUln	MaxDW	RadUln_MaxDW	14	10	14.33	12.7693	1.20661	10.3561	15.1825		10	15.1825
Mammal	Didelphis	virginiana	Opossum	RadUln	MidMax	RadUln_MidAPD	14	8.17	14.08	10.27	1.66491	6.94017	13.5998		6.94017	14.08
Mammal	Didelphis	virginiana	Opossum	RadUln	MidMin	RadUln_MidMLW	14	3.09	4.95	3.90286	0.600018	2.70282	5.10289		2.70282	5.10289
Mammal	Equus	ferus/caballus	Horse	RadUln	MaxL	RadUln_MaxL	31	320	530	448.29	44.8733	358.544	538.037		320	538.037
Mammal	Equus	ferus/caballus	Horse	RadUln	MaxPD	RadUln_PD	29	47.88	99.14	69.0321	10.2013	48.6295	89.4346		47.88	99.14
Mammal	Equus	ferus/caballus	Horse	RadUln	MaxPW	RadUln_MaxPW	32	65	121.82	91.9919	12.6463	66.6993	117.284		65	121.82
Mammal	Equus	ferus/caballus	Horse	RadUln	MaxDD	RadUln_MaxDD	31	34	72	50.871	7.88983	35.0913	66.6506		34	72
Mammal	Equus	ferus/caballus	Horse	RadUln	MaxDW	RadUln_MaxDW	32	59	115	84.9062	12.2141	60.478	109.334		59	115
Mammal	Equus	ferus/caballus	Horse	RadUln	MidMax	RadUln_MidAPD	29	21.92	47.52	31.6321	5.80452	20.023	43.2411		20.023	47.52
Mammal	Equus	ferus/caballus	Horse	RadUln	MidMin	RadUln_MidMLW	30	29.91	64.02	43.5703	7.53459	28.5011	58.6395		28.5011	64.02
Mammal	Felis	catus	Cat	RadUln	MaxL	RadUln_MaxL	4	96	135	111.5	16.9804	77.5392	145.461		77.5392	145.461
Mammal	Felis	catus	Cat	RadUln	MaxPD	RadUln_PD	4	9	14.09	11.715	2.08756	7.53988	15.8901		7.53988	15.8901
Mammal	Felis	catus	Cat	RadUln	MaxPW	RadUln_MaxPW	4	9.21	10.18	9.7775	0.423035	8.93143	10.6236		8.93143	10.6236
Mammal	Felis	catus	Cat	RadUln	MaxDD	RadUln_MaxDD	4	7	8	7.75	0.5	6.75	8.75		6.75	8.75
Mammal	Felis	catus	Cat	RadUln	MaxDW	RadUln_MaxDW	4	15	18	16.75	1.25831	14.2334	19.2666		14.2334	19.2666
Mammal	Felis	catus	Cat	RadUln	MidMax	RadUln_MidAPD	4	10	14.76	12.685	2.16619	8.35263	17.0174		8.35263	17.0174
Mammal	Felis	catus	Cat	RadUln	MidMin	RadUln_MidMLW	4	4.95	6.74	5.8	0.957462	3.88508	7.71492		3.88508	7.71492
Bird	Gallus	gallus	Chicken	RadUln	MaxL	RadUln_MaxL	7	48	105	78.5714	21.5318	35.5078	121.635		35.5078	121.635
Bird	Gallus	gallus	Chicken	RadUln	MaxPD	RadUln_PD
Bird	Gallus	gallus	Chicken	RadUln	MaxPW	RadUln_MaxPW	7	5	13	9	2.76887	3.46225	14.5377		3.46225	14.5377
Bird	Gallus	gallus	Chicken	RadUln	MaxDD	RadUln_MaxDD	7	5	18.66	11.1557	5.18141	0.792897	21.5185		0.792897	21.5185
Bird	Gallus	gallus	Chicken	RadUln	MaxDW	RadUln_MaxDW	7	5.99	18.82	12.5057	4.3187	3.86831	21.1431		3.86831	21.1431
Bird	Gallus	gallus	Chicken	RadUln	MidMax	RadUln_MidAPD	7	12.72	21.26	17.7029	3.58509	10.5327	24.873		10.5327	24.873
Bird	Gallus	gallus	Chicken	RadUln	MidMin	RadUln_MidMLW	7	3.53	6.3	5.01714	0.98917	3.0388	6.99548		3.0388	6.99548
Bird	Meleagris	gallopavo	Turkey	RadUln	MaxL	RadUln_MaxL									0	0
Bird	Meleagris	gallopavo	Turkey	RadUln	MaxPD	RadUln_PD									0	0
Bird	Meleagris	gallopavo	Turkey	RadUln	MaxPW	RadUln_MaxPW									0	0
Bird	Meleagris	gallopavo	Turkey	RadUln	MaxDD	RadUln_MaxDD									0	0
Bird	Meleagris	gallopavo	Turkey	RadUln	MaxDW	RadUln_MaxDW									0	0
Bird	Meleagris	gallopavo	Turkey	RadUln	MidMax	RadUln_MidAPD									0	0
Bird	Meleagris	gallopavo	Turkey	RadUln	MidMin	RadUln_MidMLW									0	0
Mammal	Odocoileus	hemionus	Mule Deer	RadUln	MaxL	RadUln_MaxL	17	197	316	276.059	28.261	219.537	332.581		197	332.581
Mammal	Odocoileus	hemionus	Mule Deer	RadUln	MaxPD	RadUln_PD	17	25.31	45	37.2488	4.18764	28.8735	45.6241		25.31	45.6241
Mammal	Odocoileus	hemionus	Mule Deer	RadUln	MaxPW	RadUln_MaxPW	17	31	44.26	38.6776	3.68901	31.2996	46.0557		31	46.0557
Mammal	Odocoileus	hemionus	Mule Deer	RadUln	MaxDD	RadUln_MaxDD	17	23	36	29.61	3.59106	22.4279	36.7921		22.4279	36.7921
Mammal	Odocoileus	hemionus	Mule Deer	RadUln	MaxDW	RadUln_MaxDW	17	30	43	35.92	3.3636	29.1928	42.6472		29.1928	43
Mammal	Odocoileus	hemionus	Mule Deer	RadUln	MidMax	RadUln_MidAPD	17	15.87	28.1	22.08	2.87545	16.3291	27.8309		15.87	28.1
Mammal	Odocoileus	hemionus	Mule Deer	RadUln	MidMin	RadUln_MidMLW	17	15.82	30.1	23.9135	3.40157	17.1104	30.7167		15.82	30.7167
Mammal	Odocoileus	virginianus	White-Tailed Deer	RadUln	MaxL	RadUln_MaxL	35	193	299	252.657	28.6582	195.341	309.973		193	309.973
Mammal	Odocoileus	virginianus	White-Tailed Deer	RadUln	MaxPD	RadUln_PD	34	28.06	55	35.0671	5.73249	23.6021	46.532		23.6021	55
Mammal	Odocoileus	virginianus	White-Tailed Deer	RadUln	MaxPW	RadUln_MaxPW	29	29	43	35.4586	3.74257	27.9735	42.9438		27.9735	43
Mammal	Odocoileus	virginianus	White-Tailed Deer	RadUln	MaxDD	RadUln_MaxDD	28	21	33	27.3332	3.59011	20.153	34.5134		20.153	34.5134
Mammal	Odocoileus	virginianus	White-Tailed Deer	RadUln	MaxDW	RadUln_MaxDW	33	25	41	33.5427	3.98547	25.5718	41.5137		25	41.5137
Mammal	Odocoileus	virginianus	White-Tailed Deer	RadUln	MidMax	RadUln_MidAPD	28	14.81	29	21.6157	3.08251	15.4507	27.7807		14.81	29
Mammal	Odocoileus	virginianus	White-Tailed Deer	RadUln	MidMin	RadUln_MidMLW	34	16.88	28	21.5818	2.49612	16.5895	26.574		16.5895	28
Mammal	Ovis	aries	Sheep	RadUln	MaxL	RadUln_MaxL	8	136	234	188.875	32.4277	124.02	253.73		124.02	253.73
Mammal	Ovis	aries	Sheep	RadUln	MaxPD	RadUln_PD	8	22.22	30.01	26.9037	2.82235	21.259	32.5485		21.259	32.5485
Mammal	Ovis	aries	Sheep	RadUln	MaxPW	RadUln_MaxPW	139	15.4	38.9	26.3252	6.48311	13.359	39.2914		13.359	39.2914
Mammal	Ovis	aries	Sheep	RadUln	MaxDD	RadUln_MaxDD	5	19	26	22.6	2.88097	16.8381	28.3619		16.8381	28.3619
Mammal	Ovis	aries	Sheep	RadUln	MaxDW	RadUln_MaxDW	5	25	36	31	4.52769	21.9446	40.0554		21.9446	40.0554
Mammal	Ovis	aries	Sheep	RadUln	MidMax	RadUln_MidAPD	5	7.6	15.2	12.368	2.95022	6.46757	18.2684		6.46757	18.2684
Mammal	Ovis	aries	Sheep	RadUln	MidMin	RadUln_MidMLW	5	11.38	21.23	17.386	3.89104	9.60391	25.1681		9.60391	25.1681
Mammal	Capra	hircus	Goat	RadUln	MaxL	RadUln_MaxL	3	188	226	209.667	19.5533	170.56	248.773		170.56	248.773
Mammal	Capra	hircus	Goat	RadUln	MaxPD	RadUln_PD	3	23.97	31.3	28.4333	3.91717	20.599	36.2677		20.599	36.2677
Mammal	Capra	hircus	Goat	RadUln	MaxPW	RadUln_MaxPW	73	28	42.4	33.2425	3.23088	26.7807	39.7042		26.7807	42.4
Mammal	Capra	hircus	Goat	RadUln	MaxDD	RadUln_MaxDD	3	21	27.9	24.6333	3.46458	17.7042	31.5625		17.7042	31.5625
Mammal	Capra	hircus	Goat	RadUln	MaxDW	RadUln_MaxDW	3	28	36.3	32.1	4.1509	23.7982	40.4018		23.7982	40.4018
Mammal	Capra	hircus	Goat	RadUln	MidMax	RadUln_MidAPD	3	15.12	20.11	17.4533	2.51066	12.432	22.4747		12.432	22.4747
Mammal	Capra	hircus	Goat	RadUln	MidMin	RadUln_MidMLW	9	18.84	38.92	28.1711	6.31239	15.5463	40.7959		15.5463	40.7959
Mammal	Ovis/Capra	aries/aegagrus	Sheep/Goat	RadUln	MaxL	RadUln_MaxL	11	136	234	194.545	30.1143	134.317	254.774		134.317	254.774
Mammal	Ovis/Capra	aries/aegagrus	Sheep/Goat	RadUln	MaxPD	RadUln_PD	11	22.22	31.3	27.3209	3.02577	21.2694	33.3725		21.2694	33.3725
Mammal	Ovis/Capra	aries/aegagrus	Sheep/Goat	RadUln	MaxPW	RadUln_MaxPW	212	15.4	42.4	28.7071	6.47343	15.7602	41.6539		15.4	42.4
Mammal	Ovis/Capra	aries/aegagrus	Sheep/Goat	RadUln	MaxDD	RadUln_MaxDD	8	19	27.9	23.3625	3.04628	17.2699	29.4551		17.2699	29.4551
Mammal	Ovis/Capra	aries/aegagrus	Sheep/Goat	RadUln	MaxDW	RadUln_MaxDW	8	25	36.3	31.4125	4.1184	23.1757	39.6493		23.1757	39.6493
Mammal	Ovis/Capra	aries/aegagrus	Sheep/Goat	RadUln	MidMax	RadUln_MidAPD	8	7.6	20.11	14.275	3.70156	6.87189	21.6781		6.87189	21.6781
Mammal	Ovis/Capra	aries/aegagrus	Sheep/Goat	RadUln	MidMin	RadUln_MidMLW	14	11.38	38.92	24.3193	7.61179	9.0957	39.5429		9.0957	39.5429
Mammal	Procyon	lotor	Raccoon	RadUln	MaxL	RadUln_MaxL
Mammal	Procyon	lotor	Raccoon	RadUln	MaxPD	RadUln_PD
Mammal	Procyon	lotor	Raccoon	RadUln	MaxPW	RadUln_MaxPW
Mammal	Procyon	lotor	Raccoon	RadUln	MaxDD	RadUln_MaxDD
Mammal	Procyon	lotor	Raccoon	RadUln	MaxDW	RadUln_MaxDW
Mammal	Procyon	lotor	Raccoon	RadUln	MidMax	RadUln_MidAPD
Mammal	Procyon	lotor	Raccoon	RadUln	MidMin	RadUln_MidMLW
Mammal	Sus	scrofa	Pig	RadUln	MaxL	RadUln_MaxL	6	188	275	224.167	28.8612	166.444	281.889		166.444	281.889
Mammal	Sus	scrofa	Pig	RadUln	MaxPD	RadUln_PD	6	37.12	61.3	43.825	8.84532	26.1344	61.5156		26.1344	61.5156
Mammal	Sus	scrofa	Pig	RadUln	MaxPW	RadUln_MaxPW	6	30	51	36.5667	7.74123	21.0842	52.0491		21.0842	52.0491
Mammal	Sus	scrofa	Pig	RadUln	MaxDD	RadUln_MaxDD	4	28	50	35.25	9.97914	15.2917	55.2083		20	55.2083
Mammal	Sus	scrofa	Pig	RadUln	MaxDW	RadUln_MaxDW	6	38	60	45	7.7201	29.5598	60.4402		29.5598	60.4402
Mammal	Sus	scrofa	Pig	RadUln	MidMax	RadUln_MidAPD	4	30.38	51.1	36.87	9.693	17.484	56.256		23	56.256
Mammal	Sus	scrofa	Pig	RadUln	MidMin	RadUln_MidMLW	7	18.28	31	22.9157	4.81948	13.2767	32.5547		15	32.5547
Mammal	Sylvilagus	floridanus	Eastern Cotton-Tail	RadUln	MaxL	RadUln_MaxL	28	61	74	68.5975	3.91756	60.7624	76.4326		60.7624	76.4326
Mammal	Sylvilagus	floridanus	Eastern Cotton-Tail	RadUln	MaxPD	RadUln_PD	33	6.2	8	7.07727	0.487515	6.10224	8.0523		6.10224	8.0523
Mammal	Sylvilagus	floridanus	Eastern Cotton-Tail	RadUln	MaxPW	RadUln_MaxPW	32	4	6.03	5.28781	0.429281	4.42925	6.14637		4	6.14637
Mammal	Sylvilagus	floridanus	Eastern Cotton-Tail	RadUln	MaxDD	RadUln_MaxDD	23	3	5.79	4.3487	0.734558	2.87958	5.81781		2.87958	5.81781
Mammal	Sylvilagus	floridanus	Eastern Cotton-Tail	RadUln	MaxDW	RadUln_MaxDW	27	4.66	8.67	7.24815	1.11658	5.01498	9.48132		4.66	9.48132
Mammal	Sylvilagus	floridanus	Eastern Cotton-Tail	RadUln	MidMax	RadUln_MidAPD	23	4.69	6	5.32913	0.357083	4.61496	6.0433		4.61496	6.0433
Mammal	Sylvilagus	floridanus	Eastern Cotton-Tail	RadUln	MidMin	RadUln_MidMLW	27	3	4.23	3.56037	0.300493	2.95938	4.16136		2.95938	4.23
Mammal	Urocyon	cinereoargenteus	Grey Fox	RadUln	MaxL	RadUln_MaxL	11	91	120	109.727	8.10051	93.5263	125.928		91	125.928
Mammal	Urocyon	cinereoargenteus	Grey Fox	RadUln	MaxPD	RadUln_PD	12	10.49	15.21	13.5133	1.25901	10.9953	16.0314		10.49	16.0314
Mammal	Urocyon	cinereoargenteus	Grey Fox	RadUln	MaxPW	RadUln_MaxPW	12	7.46	10.38	8.98167	0.728471	7.52473	10.4386		7.46	10.4386
Mammal	Urocyon	cinereoargenteus	Grey Fox	RadUln	MaxDD	RadUln_MaxDD	11	7	19.25	9.74909	4.31001	1.12908	18.3691		5	19.25
Mammal	Urocyon	cinereoargenteus	Grey Fox	RadUln	MaxDW	RadUln_MaxDW	11	8.97	19	15.2991	3.31089	8.67731	21.9209		8.67731	21.9209
Mammal	Urocyon	cinereoargenteus	Grey Fox	RadUln	MidMax	RadUln_MidAPD	11	9.1	12.52	11.2836	1.13774	9.00816	13.5591		9.00816	13.5591
Mammal	Urocyon	cinereoargenteus	Grey Fox	RadUln	MidMin	RadUln_MidMLW	11	5.13	6.63	6.10636	0.441005	5.22435	6.98837		5.13	6.98837
Mammal	Ursus	americanus	Black Bear	RadUln	MaxL	RadUln_MaxL
Mammal	Ursus	americanus	Black Bear	RadUln	MaxPD	RadUln_PD
Mammal	Ursus	americanus	Black Bear	RadUln	MaxPW	RadUln_MaxPW
Mammal	Ursus	americanus	Black Bear	RadUln	MaxDD	RadUln_MaxDD
Mammal	Ursus	americanus	Black Bear	RadUln	MaxDW	RadUln_MaxDW
Mammal	Ursus	americanus	Black Bear	RadUln	MidMax	RadUln_MidAPD
Mammal	Ursus	americanus	Black Bear	RadUln	MidMin	RadUln_MidMLW
Mammal	Ursus	arctos	Brown Bear	RadUln	MaxL	RadUln_MaxL
Mammal	Ursus	arctos	Brown Bear	RadUln	MaxPD	RadUln_PD
Mammal	Ursus	arctos	Brown Bear	RadUln	MaxPW	RadUln_MaxPW
Mammal	Ursus	arctos	Brown Bear	RadUln	MaxDD	RadUln_MaxDD
Mammal	Ursus	arctos	Brown Bear	RadUln	MaxDW	RadUln_MaxDW
Mammal	Ursus	arctos	Brown Bear	RadUln	MidMax	RadUln_MidAPD
Mammal	Ursus	arctos	Brown Bear	RadUln	MidMin	RadUln_MidMLW
Mammal	Vulpes	vulpes	Red Fox	RadUln	MaxL	RadUln_MaxL	18	123	161	139.333	8.15295	123.027	155.639		123	161
Mammal	Vulpes	vulpes	Red Fox	RadUln	MaxPD	RadUln_PD	18	13.01	17.6	15.1539	1.13494	12.884	17.4238		12.884	17.6
Mammal	Vulpes	vulpes	Red Fox	RadUln	MaxPW	RadUln_MaxPW	18	8.97	11.56	10.0461	0.634926	8.77626	11.316		8.77626	11.56
Mammal	Vulpes	vulpes	Red Fox	RadUln	MaxDD	RadUln_MaxDD	18	8	14	9.96056	1.57725	6.80606	13.1151		6.80606	14
Mammal	Vulpes	vulpes	Red Fox	RadUln	MaxDW	RadUln_MaxDW	18	17	23.26	19.7661	1.5481	16.6699	22.8623		16.6699	23.26
Mammal	Vulpes	vulpes	Red Fox	RadUln	MidMax	RadUln_MidAPD	18	8.74	13.13	11.2033	1.16912	8.8651	13.5416		8.74	13.5416
Mammal	Vulpes	vulpes	Red Fox	RadUln	MidMin	RadUln_MidMLW	18	6.25	8.27	7.21222	0.571783	6.06866	8.35579		6.06866	8.35579
Bird	Aquila	chrysaetos	Golden Eagle	RadUln	MaxL	RadUln_MaxL	4	207	238	227.5	13.9164	199.667	255.333		199.667	255.333
Bird	Aquila	chrysaetos	Golden Eagle	RadUln	MaxPD	RadUln_PD
Bird	Aquila	chrysaetos	Golden Eagle	RadUln	MaxPW	RadUln_MaxPW	4	16	24	19.5	3.69685	12.1063	26.8937		12.1063	26.8937
Bird	Aquila	chrysaetos	Golden Eagle	RadUln	MaxDD	RadUln_MaxDD	4	19	28	23.25	4.42531	14.3994	32.1006		14.3994	32.1006
Bird	Aquila	chrysaetos	Golden Eagle	RadUln	MaxDW	RadUln_MaxDW	4	15.69	25	20.305	4.40851	11.488	29.122		11.488	29.122
Bird	Aquila	chrysaetos	Golden Eagle	RadUln	MidMax	RadUln_MidAPD	4	9.67	23.74	16.3625	7.16839	2.02572	30.6993		2.02572	30.6993
Bird	Aquila	chrysaetos	Golden Eagle	RadUln	MidMin	RadUln_MidMLW	4	9.85	23.83	16.98	7.85108	1.27783	32.6822		1.27783	32.6822
Turtle	Terrapene	carolina	Common Box Turtle	RadUln	MaxL	RadUln_MaxL
Turtle	Terrapene	carolina	Common Box Turtle	RadUln	MaxPD	RadUln_PD
Turtle	Terrapene	carolina	Common Box Turtle	RadUln	MaxPW	RadUln_MaxPW
Turtle	Terrapene	carolina	Common Box Turtle	RadUln	MaxDD	RadUln_MaxDD
Turtle	Terrapene	carolina	Common Box Turtle	RadUln	MaxDW	RadUln_MaxDW
Turtle	Terrapene	carolina	Common Box Turtle	RadUln	MidMax	RadUln_MidAPD
Turtle	Terrapene	carolina	Common Box Turtle	RadUln	MidMin	RadUln_MidMLW
Turtle	Chelydra	serpentina	Common Snapping Turtle	RadUln	MaxL	RadUln_MaxL
Turtle	Chelydra	serpentina	Common Snapping Turtle	RadUln	MaxPD	RadUln_PD
Turtle	Chelydra	serpentina	Common Snapping Turtle	RadUln	MaxPW	RadUln_MaxPW
Turtle	Chelydra	serpentina	Common Snapping Turtle	RadUln	MaxDD	RadUln_MaxDD
Turtle	Chelydra	serpentina	Common Snapping Turtle	RadUln	MaxDW	RadUln_MaxDW
Turtle	Chelydra	serpentina	Common Snapping Turtle	RadUln	MidMax	RadUln_MidAPD
Turtle	Chelydra	serpentina	Common Snapping Turtle	RadUln	MidMin	RadUln_MidMLW
Mammal	Homo	sapiens	Human	RadUln	MaxL	RadUln_MaxL
Mammal	Homo	sapiens	Human	RadUln	MaxPD	RadUln_PD
Mammal	Homo	sapiens	Human	RadUln	MaxPW	RadUln_MaxPW
Mammal	Homo	sapiens	Human	RadUln	MaxDD	RadUln_MaxDD
Mammal	Homo	sapiens	Human	RadUln	MaxDW	RadUln_MaxDW
Mammal	Homo	sapiens	Human	RadUln	MidMax	RadUln_MidAPD
Mammal	Homo	sapiens	Human	RadUln	MidMin	RadUln_MidMLW

## Sheet: TableS5_Ulna
Table S5. Descriptive statistics for ulnar measurements collected by species.
Class	Genus	Species	Common_Name	Bone	Measurement	Variable	Count	Min	Max	Ave	SD	SD2-	SD2+		Web_Min	Web_Max
Mammal	Alces	alces	Moose	Ulna	MaxL	Uln_MaxL	2	420	512	466	65.0538	335.892	596.108		335.892	596.108
Mammal	Alces	alces	Moose	Ulna	MaxPD	Uln_MaxPD	4	52.53	78.77	64.9925	13.6378	37.7168	92.2682		37.7168	92.2682
Mammal	Alces	alces	Moose	Ulna	MaxPW	Uln_MaxPW
Mammal	Alces	alces	Moose	Ulna	MidMax	Uln_MidMax	2	21.77	25.13	23.45	2.37588	18.6982	28.2018		18.6982	28.2018
Mammal	Alces	alces	Moose	Ulna	MidMin	Uln_MidMin	2	6.98	9.28	8.13	1.62635	4.87731	11.3827		4.87731	11.3827
Mammal	Anas	platyrhynchos	Mallard Duck	Ulna	MaxL	Uln_MaxL	30	75	95	81.8333	5.13328	71.5668	92.0999		71.5668	95
Mammal	Anas	platyrhynchos	Mallard Duck	Ulna	MaxPD	Uln_MaxPD
Mammal	Anas	platyrhynchos	Mallard Duck	Ulna	MaxPW	Uln_MaxPW
Mammal	Anas	platyrhynchos	Mallard Duck	Ulna	MidMax	Uln_MidMax	25	5.28	7.38	5.8904	0.51998	4.85044	6.93036		4.85044	7.38
Mammal	Anas	platyrhynchos	Mallard Duck	Ulna	MidMin	Uln_MidMin	25	4.85	6.94	5.3848	0.505108	4.37458	6.39502		4.37458	6.94
Mammal	Bos	taurus	Cow	Ulna	MaxL	Uln_MaxL
Mammal	Bos	taurus	Cow	Ulna	MaxPD	Uln_MaxPD
Mammal	Bos	taurus	Cow	Ulna	MaxPW	Uln_MaxPW
Mammal	Bos	taurus	Cow	Ulna	MidMax	Uln_MidMax
Mammal	Bos	taurus	Cow	Ulna	MidMin	Uln_MidMin
Mammal	Branta	canadensis	Canadian Goose	Ulna	MaxL	Uln_MaxL	31	117	181	144.226	21.1907	101.844	186.607		101.844	186.607
Mammal	Branta	canadensis	Canadian Goose	Ulna	MaxPD	Uln_MaxPD	4	8	10	9	0.816497	7.36701	10.633		7.36701	10.633
Mammal	Branta	canadensis	Canadian Goose	Ulna	MaxPW	Uln_MaxPW	4	14	17	16	1.41421	13.1716	18.8284		13.1716	18.8284
Mammal	Branta	canadensis	Canadian Goose	Ulna	MidMax	Uln_MidMax	31	5.69	9.75	7.53323	1.21843	5.09636	9.97009		5.09636	9.97009
Mammal	Branta	canadensis	Canadian Goose	Ulna	MidMin	Uln_MidMin	31	5.31	8.96	6.93258	1.06093	4.81071	9.05445		4.81071	9.05445
Mammal	Canis	familiaris	Dog	Ulna	MaxL	Uln_MaxL	68	67.3	314	176.782	57.1945	62.3933	291.171		62.3933	314
Mammal	Canis	familiaris	Dog	Ulna	MaxPD	Uln_MaxPD	67	7.9	57	21.6276	10.844	-0.0603585	43.3156		5	57
Mammal	Canis	familiaris	Dog	Ulna	MaxPW	Uln_MaxPW	42	10.4	23	15.3621	3.48118	8.39979	22.3245		8.39979	23
Mammal	Canis	familiaris	Dog	Ulna	MidMax	Uln_MidMax	31	5.05	17.91	11.5829	3.28509	5.01272	18.1531		5.01272	18.1531
Mammal	Canis	familiaris	Dog	Ulna	MidMin	Uln_MidMin	32	3.55	14.04	8.05281	2.92184	2.20912	13.8965		3	14.04
Mammal	Canis	latrans	Coyote	Ulna	MaxL	Uln_MaxL	58	162	227.08	190.146	12.5235	165.098	215.193		162	227.08
Mammal	Canis	latrans	Coyote	Ulna	MaxPD	Uln_MaxPD	28	17.78	33	22.2104	2.67855	16.8533	27.5675		16.8533	33
Mammal	Canis	latrans	Coyote	Ulna	MaxPW	Uln_MaxPW	17	13.4	17.22	15.35	1.16464	13.0207	17.6793		13.0207	17.6793
Mammal	Canis	latrans	Coyote	Ulna	MidMax	Uln_MidMax	17	4.87	10	7.62412	1.07871	5.46669	9.78155		4.87	10
Mammal	Canis	latrans	Coyote	Ulna	MidMin	Uln_MidMin	17	3.64	8	5.90294	1.10647	3.69	8.11588		3.64	8.11588
Mammal	Canis	lupus	Wolf	Ulna	MaxL	Uln_MaxL	38	195.74	302.5	243.393	23.4802	196.433	290.354		195.74	302.5
Mammal	Canis	lupus	Wolf	Ulna	MaxPD	Uln_MaxPD	28	26.99	39.75	31.8175	2.77347	26.2706	37.3644		26.2706	39.75
Mammal	Canis	lupus	Wolf	Ulna	MaxPW	Uln_MaxPW	22	19.4	29.85	22.3223	2.34742	17.6274	27.0171		17.6274	29.85
Mammal	Canis	lupus	Wolf	Ulna	MaxDD	Uln_MaxDD	22	9.69	16.69	12.7923	1.7345	9.32327	16.2613		9.32327	16.69
Mammal	Canis	lupus	Wolf	Ulna	MidMin	Uln_MidMin	22	6.98	11.42	9.65455	1.21923	7.21609	12.093		6.98	12.093
Mammal	Cervus	canadensis/elaphus	Elk	Ulna	MaxL	Uln_MaxL	30	346	459	416.867	27.9528	360.961	472.772		346	472.772
Mammal	Cervus	canadensis/elaphus	Elk	Ulna	MaxPD	Uln_MaxPD	31	49.63	71.43	60.5671	5.60849	49.3501	71.7841		49.3501	71.7841
Mammal	Cervus	canadensis/elaphus	Elk	Ulna	MaxPW	Uln_MaxPW	30	35.59	78	66.2173	11.213	43.7914	88.6433		35.59	88.6433
Mammal	Cervus	canadensis/elaphus	Elk	Ulna	MaxDD	Uln_MaxDD	3	13.5	17.45	15.2167	2.02505	11.1666	19.2668		11.1666	19.2668
Mammal	Cervus	canadensis/elaphus	Elk	Ulna	MidMin	Uln_MidMin	3	4.21	5.68	4.92333	0.735957	3.45142	6.39525		3.45142	6.39525
Mammal	Didelphis	virginiana	Opossum	Ulna	MaxL	Uln_MaxL	33	68	93	80.9658	6.47306	68.0196	93.9119		68	93.9119
Mammal	Didelphis	virginiana	Opossum	Ulna	MaxPD	Uln_MaxPD	32	7.11	11.59	9.20656	1.24674	6.71309	11.7		6.71309	11.7
Mammal	Didelphis	virginiana	Opossum	Ulna	MaxPW	Uln_MaxPW	16	5.72	12	9.29625	1.87294	5.55038	13.0421		5.55038	13.0421
Mammal	Didelphis	virginiana	Opossum	Ulna	MidMax	Uln_MidMax	18	4.75	8.85	6.415	1.26122	3.89256	8.93744		3.89256	8.93744
Mammal	Didelphis	virginiana	Opossum	Ulna	MidMin	Uln_MidMin	18	2.75	4.41	3.35444	0.469333	2.41578	4.29311		2.41578	4.41
Mammal	Equus	ferus/caballus	Horse	Ulna	MaxL	Uln_MaxL
Mammal	Equus	ferus/caballus	Horse	Ulna	MaxPD	Uln_MaxPD
Mammal	Equus	ferus/caballus	Horse	Ulna	MaxPW	Uln_MaxPW
Mammal	Equus	ferus/caballus	Horse	Ulna	MidMax	Uln_MidMax
Mammal	Equus	ferus/caballus	Horse	Ulna	MidMin	Uln_MidMin
Mammal	Felis	catus	Cat	Ulna	MaxL	Uln_MaxL	38	72.02	135	110.037	12.4382	85.1602	134.913		72.02	135
Mammal	Felis	catus	Cat	Ulna	MaxPD	Uln_MaxPD	32	9	14.09	12.0356	1.19645	9.64272	14.4285		9	14.4285
Mammal	Felis	catus	Cat	Ulna	MaxPW	Uln_MaxPW	38	6.13	11.32	9.17816	1.08665	7.00485	11.3515		6.13	11.3515
Mammal	Felis	catus	Cat	Ulna	MidMax	Uln_MidMax	28	5	8.07	6.93071	0.665627	5.59946	8.26197		5	8.26197
Mammal	Felis	catus	Cat	Ulna	MidMin	Uln_MidMin	28	3	5.79	4.61964	0.56905	3.48154	5.75774		3	5.79
Bird	Gallus	gallus	Chicken	Ulna	MaxL	Uln_MaxL	31	47	105	76.1613	13.9645	48.2323	104.09		47	105
Bird	Gallus	gallus	Chicken	Ulna	MaxPD	Uln_MaxPD
Bird	Gallus	gallus	Chicken	Ulna	MaxPW	Uln_MaxPW	8	5	13	9	2.56348	3.87304	14.127		3.87304	14.127
Bird	Gallus	gallus	Chicken	Ulna	MidMax	Uln_MidMax	25	4.34	8.15	6.7796	0.988494	4.80261	8.75659		4.34	8.75659
Bird	Gallus	gallus	Chicken	Ulna	MidMin	Uln_MidMin	24	2.91	6.09	4.69583	0.759061	3.17771	6.21395		2.91	6.21395
Bird	Meleagris	gallopavo	Turkey	Ulna	MaxL	Uln_MaxL	33	108	154	136.636	13.856	108.924	164.348		108	164.348
Bird	Meleagris	gallopavo	Turkey	Ulna	MaxPD	Uln_MaxPD	4	11	15	13	1.63299	9.73401	16.266		9.73401	16.266
Bird	Meleagris	gallopavo	Turkey	Ulna	MaxPW	Uln_MaxPW	4	14	17	15.5	1.73205	12.0359	18.9641		12.0359	18.9641
Bird	Meleagris	gallopavo	Turkey	Ulna	MidMax	Uln_MidMax	33	7	12.6	10.6127	1.23488	8.14296	13.0825		7	13.0825
Bird	Meleagris	gallopavo	Turkey	Ulna	MidMin	Uln_MidMin	33	6.52	9.64	8.12576	0.875429	6.3749	9.87661		6.3749	9.87661
Mammal	Odocoileus	hemionus	Mule Deer	Ulna	MaxL	Uln_MaxL	33	197	316	271.606	30.1402	211.326	331.887		197	331.887
Mammal	Odocoileus	hemionus	Mule Deer	Ulna	MaxPD	Uln_MaxPD	33	25.31	47	37.4897	4.39027	28.7092	46.2702		25.31	47
Mammal	Odocoileus	hemionus	Mule Deer	Ulna	MaxPW	Uln_MaxPW	22	21.5	44.26	35.0832	7.53192	20.0194	50.147		20.0194	50.147
Mammal	Odocoileus	hemionus	Mule Deer	Ulna	MidMax	Uln_MidMax	16	7.54	15.97	10.5338	2.21484	6.10407	14.9634		6.10407	15.97
Mammal	Odocoileus	hemionus	Mule Deer	Ulna	MidMin	Uln_MidMin	16	2.48	5.68	3.61	0.995255	1.61949	5.60051		1.61949	5.68
Mammal	Odocoileus	virginianus	White-Tailed Deer	Ulna	MaxL	Uln_MaxL	8	193	262	235.875	22.8188	190.237	281.513		190.237	281.513
Mammal	Odocoileus	virginianus	White-Tailed Deer	Ulna	MaxPD	Uln_MaxPD	8	29.55	55	37.8837	9.81421	18.2553	57.5122		23	57.5122
Mammal	Odocoileus	virginianus	White-Tailed Deer	Ulna	MaxPW	Uln_MaxPW	3	18	21	19.7667	1.5695	16.6277	22.9057		16.6277	22.9057
Mammal	Odocoileus	virginianus	White-Tailed Deer	Ulna	MidMax	Uln_MidMax	7	2	10.82	7.61429	3.55205	0.510194	14.7184		2	14.7184
Mammal	Odocoileus	virginianus	White-Tailed Deer	Ulna	MidMin	Uln_MidMin	8	2.67	9	4.4675	2.33375	-0.200002	9.135		2	9.135
Mammal	Ovis	aries	Sheep	Ulna	MaxL	Uln_MaxL	8	136	234	188.875	32.4277	124.02	253.73		124.02	253.73
Mammal	Ovis	aries	Sheep	Ulna	MaxPD	Uln_MaxPD	8	22.22	30.01	26.9037	2.82235	21.259	32.5485		21.259	32.5485
Mammal	Ovis	aries	Sheep	Ulna	MaxPW	Uln_MaxPW	59	15.4	35	20.1644	4.44983	11.2648	29.0641		11.2648	35
Mammal	Ovis	aries	Sheep	Ulna	MidMax	Uln_MidMax	3	4.4	9.96	7.39333	2.80445	1.78444	13.0022		1.78444	13.0022
Mammal	Ovis	aries	Sheep	Ulna	MidMin	Uln_MidMin	3	1.44	3.26	2.5	0.946361	0.607277	4.39272		0.607277	4.39272
Mammal	Capra	hircus	Goat	Ulna	MaxL	Uln_MaxL	3	188	226	207	19	169	245		169	245
Mammal	Capra	hircus	Goat	Ulna	MaxPD	Uln_MaxPD	3	23.97	30.4	28.1333	3.6103	20.9127	35.3539		20.9127	35.3539
Mammal	Capra	hircus	Goat	Ulna	MaxPW	Uln_MaxPW	3	26.7	33	29.9	3.15119	23.5976	36.2024		23.5976	36.2024
Mammal	Capra	hircus	Goat	Ulna	MidMax	Uln_MidMax
Mammal	Capra	hircus	Goat	Ulna	MidMin	Uln_MidMin
Mammal	Ovis/Capra	aries/aegagrus	Sheep/Goat	Ulna	MaxL	Uln_MaxL	12	136	234	191.75	29.177	133.396	250.104		133.396	250.104
Mammal	Ovis/Capra	aries/aegagrus	Sheep/Goat	Ulna	MaxPD	Uln_MaxPD	12	22.22	37	28.0525	3.9596	20.1333	35.9717		20.1333	37
Mammal	Ovis/Capra	aries/aegagrus	Sheep/Goat	Ulna	MaxPW	Uln_MaxPW	63	15.4	35	20.5937	4.82891	10.9358	30.2515		10.9358	35
Mammal	Ovis/Capra	aries/aegagrus	Sheep/Goat	Ulna	MidMax	Uln_MidMax	4	4.4	9.96	7.295	2.29825	2.69849	11.8915		2.69849	11.8915
Mammal	Ovis/Capra	aries/aegagrus	Sheep/Goat	Ulna	MidMin	Uln_MidMin	5	1.44	3.64	2.628	0.902618	0.822763	4.43324		0.822763	4.43324
Mammal	Procyon	lotor	Raccoon	Ulna	MaxL	Uln_MaxL	35	87	132.17	114.461	10.4957	93.4694	135.452		87	135.452
Mammal	Procyon	lotor	Raccoon	Ulna	MaxPD	Uln_MaxPD	31	8.97	13.32	11.391	1.12863	9.13372	13.6482		8.97	13.6482
Mammal	Procyon	lotor	Raccoon	Ulna	MaxPW	Uln_MaxPW	4	8.39	10.1	9.34	0.806102	7.7278	10.9522		7.7278	10.9522
Mammal	Procyon	lotor	Raccoon	Ulna	MidMax	Uln_MidMax	26	4.91	7.55	6.02692	0.774306	4.47831	7.57554		4.47831	7.57554
Mammal	Procyon	lotor	Raccoon	Ulna	MidMin	Uln_MidMin	26	3.34	5.22	4.15115	0.571106	3.00894	5.29337		3.00894	5.29337
Mammal	Sus	scrofa	Pig	Ulna	MaxL	Uln_MaxL	5	188	257	222.4	25.2943	171.811	272.989		171.811	272.989
Mammal	Sus	scrofa	Pig	Ulna	MaxPD	Uln_MaxPD	6	27.6	61.3	41.9333	11.0382	19.8569	64.0098		23	64.0098
Mammal	Sus	scrofa	Pig	Ulna	MaxPW	Uln_MaxPW	3	28.6	33	30.5333	2.24796	26.0374	35.0293		26.0374	35.0293
Mammal	Sus	scrofa	Pig	Ulna	MidMax	Uln_MidMax	2	21.56	23.67	22.615	1.492	19.631	25.599		19.631	25.599
Mammal	Sus	scrofa	Pig	Ulna	MidMin	Uln_MidMin	3	9.56	21.06	14.4967	5.92005	2.65656	26.3368		7	26.3368
Mammal	Sylvilagus	floridanus	Eastern Cotton-Tail	Ulna	MaxL	Uln_MaxL	28	61	74	68.5975	3.91756	60.7624	76.4326		60.7624	76.4326
Mammal	Sylvilagus	floridanus	Eastern Cotton-Tail	Ulna	MaxPD	Uln_MaxPD	33	6.2	8	7.07727	0.487515	6.10224	8.0523		6.10224	8.0523
Mammal	Sylvilagus	floridanus	Eastern Cotton-Tail	Ulna	MaxPW	Uln_MaxPW	30	4	6.03	5.261	0.422451	4.4161	6.1059		4	6.1059
Mammal	Sylvilagus	floridanus	Eastern Cotton-Tail	Ulna	MidMax	Uln_MidMax	5	2.78	4	3.454	0.560785	2.33243	4.57557		2.33243	4.57557
Mammal	Sylvilagus	floridanus	Eastern Cotton-Tail	Ulna	MidMin	Uln_MidMin	5	1.62	2	1.906	0.16456	1.57688	2.23512		1.57688	2.23512
Mammal	Urocyon	cinereoargenteus	Grey Fox	Ulna	MaxL	Uln_MaxL	41	91	131	111.424	7.16513	97.0941	125.755		91	131
Mammal	Urocyon	cinereoargenteus	Grey Fox	Ulna	MaxPD	Uln_MaxPD	34	10.49	17	13.9344	1.30814	11.3181	16.5507		10.49	17
Mammal	Urocyon	cinereoargenteus	Grey Fox	Ulna	MaxPW	Uln_MaxPW	34	6	11	9.01441	1.01239	6.98962	11.0392		6	11.0392
Mammal	Urocyon	cinereoargenteus	Grey Fox	Ulna	MidMax	Uln_MidMax	22	5.16	9	6.07364	0.875005	4.32363	7.82365		4.32363	9
Mammal	Urocyon	cinereoargenteus	Grey Fox	Ulna	MidMin	Uln_MidMin	22	3.31	5	4.045	0.490964	3.06307	5.02693		3.06307	5.02693
Mammal	Ursus	americanus	Black Bear	Ulna	MaxL	Uln_MaxL	18	250.48	314	291.391	18.6708	254.05	328.733		250.48	328.733
Mammal	Ursus	americanus	Black Bear	Ulna	MaxPD	Uln_MaxPD	12	39.54	57	48.64	4.85344	38.9331	58.3469		38.9331	58.3469
Mammal	Ursus	americanus	Black Bear	Ulna	MaxPW	Uln_MaxPW	12	31.87	42	37.3642	3.61064	30.1429	44.5854		30.1429	44.5854
Mammal	Ursus	americanus	Black Bear	Ulna	MidMax	Uln_MidMax	12	21.08	29.15	25.2733	2.81167	19.65	30.8967		19.65	30.8967
Mammal	Ursus	americanus	Black Bear	Ulna	MidMin	Uln_MidMin	12	14.97	21.18	17.9608	2.06833	13.8242	22.0975		13.8242	22.0975
Mammal	Ursus	arctos	Brown Bear	Ulna	MaxL	Uln_MaxL	19	283	407	334.501	31.7657	270.969	398.032		270.969	407
Mammal	Ursus	arctos	Brown Bear	Ulna	MaxPD	Uln_MaxPD	15	44.34	76.77	57.418	8.2406	40.9368	73.8992		40.9368	76.77
Mammal	Ursus	arctos	Brown Bear	Ulna	MaxPW	Uln_MaxPW	12	26.61	58.7	46.535	8.64136	29.2523	63.8177		26.61	63.8177
Mammal	Ursus	arctos	Brown Bear	Ulna	MidMax	Uln_MidMax	15	25.7	52.56	34.0527	6.27228	21.5081	46.5972		21.5081	52.56
Mammal	Ursus	arctos	Brown Bear	Ulna	MidMin	Uln_MidMin	15	14.58	30.58	21.1407	4.78118	11.5783	30.703		11.5783	30.703
Mammal	Vulpes	vulpes	Red Fox	Ulna	MaxL	Uln_MaxL	39	107	161	137.93	10.5007	116.928	158.931		107	161
Mammal	Vulpes	vulpes	Red Fox	Ulna	MaxPD	Uln_MaxPD	35	13.01	18	15.3531	1.09604	13.1611	17.5452		13.01	18
Mammal	Vulpes	vulpes	Red Fox	Ulna	MaxPW	Uln_MaxPW	35	8	11.56	9.68457	0.836524	8.01152	11.3576		8	11.56
Mammal	Vulpes	vulpes	Red Fox	Ulna	MidMax	Uln_MidMax	16	4.97	7.33	5.7775	0.566527	4.64445	6.91055		4.64445	7.33
Mammal	Vulpes	vulpes	Red Fox	Ulna	MidMin	Uln_MidMin	16	3.53	5	4.24062	0.408909	3.42281	5.05844		3.42281	5.05844
Bird	Aquila	chrysaetos	Golden Eagle	Ulna	MaxL	Uln_MaxL	20	200	238	217.4	11.1752	195.05	239.75		195.05	239.75
Bird	Aquila	chrysaetos	Golden Eagle	Ulna	MaxPD	Uln_MaxPD
Bird	Aquila	chrysaetos	Golden Eagle	Ulna	MaxPW	Uln_MaxPW	4	16	24	19.5	3.69685	12.1063	26.8937		12.1063	26.8937
Bird	Aquila	chrysaetos	Golden Eagle	Ulna	MidMax	Uln_MidMax	16	9.88	12.43	10.7375	0.64037	9.45676	12.0182		9.45676	12.43
Bird	Aquila	chrysaetos	Golden Eagle	Ulna	MidMin	Uln_MidMin	16	8.79	11.41	9.755	0.618762	8.51748	10.9925		8.51748	11.41
Turtle	Terrapene	carolina	Common Box Turtle	Ulna	MaxL	Uln_MaxL	24	13	22	18.26	2.25511	13.7498	22.7702		13	22.7702
Turtle	Terrapene	carolina	Common Box Turtle	Ulna	MaxPD	Uln_MaxPD
Turtle	Terrapene	carolina	Common Box Turtle	Ulna	MaxPW	Uln_MaxPW
Turtle	Terrapene	carolina	Common Box Turtle	Ulna	MidMax	Uln_MidMax	24	1.83	3.02	2.41083	0.337895	1.73504	3.08662		1.73504	3.08662
Turtle	Terrapene	carolina	Common Box Turtle	Ulna	MidMin	Uln_MidMin	24	1	2.07	1.39917	0.24945	0.900266	1.89807		0.900266	2.07
Turtle	Chelydra	serpentina	Common Snapping Turtle	Ulna	MaxL	Uln_MaxL	29	12	53	30.9783	9.49655	11.9852	49.9714		11.9852	53
Turtle	Chelydra	serpentina	Common Snapping Turtle	Ulna	MaxPD	Uln_MaxPD
Turtle	Chelydra	serpentina	Common Snapping Turtle	Ulna	MaxPW	Uln_MaxPW
Turtle	Chelydra	serpentina	Common Snapping Turtle	Ulna	MidMax	Uln_MidMax	29	2.16	11.93	6.1131	1.97183	2.16945	10.0568		2.16	11.93
Turtle	Chelydra	serpentina	Common Snapping Turtle	Ulna	MidMin	Uln_MidMin	29	1.15	5	2.9	0.8958	1.1084	4.6916		1.1084	5
Mammal	Homo	sapiens	Human	Ulna	MaxL	Uln_MaxL	406	210.75	334	262.638	20.4056	221.827	303.449		210.75	334
Mammal	Homo	sapiens	Human	Ulna	MaxPD	Uln_MaxPD	3	23	28	25.3333	2.51661	20.3001	30.3666		20.3001	30.3666
Mammal	Homo	sapiens	Human	Ulna	MaxPW	Uln_MaxPW	257	13.5	35	25.6119	3.38884	18.8342	32.3896		13.5	35
Mammal	Homo	sapiens	Human	Ulna	MidMax	Uln_MidMax	477	10	24	16.7055	2.39584	11.9138	21.4971		10	24
Mammal	Homo	sapiens	Human	Ulna	MidMin	Uln_MidMin	477	8.7	19	13.1788	1.93813	9.30254	17.0551		8.7	19

## Sheet: TableS6_Tib(TibFib)
Table S6. Descriptive statistics for tibial measurements collected by species.
Class	Genus	Species	Common_Name	Bone	Measurement	Variable	Count	Min	Max	Ave	SD	SD2-	SD2+		Web_Min	Web_Max
Mammal	Alces	alces	Moose	Tibia	MaxL	Tib_MaxL	21	351	530	461.19	53.0449	355.101	567.28		351	567.28
Mammal	Alces	alces	Moose	Tibia	MaxPW	Tib_MaxPW	20	87	121	104.827	9.52201	85.783	123.871		85.783	123.871
Mammal	Alces	alces	Moose	Tibia	MaxDD	Tib_MaxDD	20	47	62.24	53.919	3.78921	46.3406	61.4974		46.3406	62.24
Mammal	Alces	alces	Moose	Tibia	MaxDW	Tib_MaxDW	20	60	78.78	69.238	5.09367	59.0507	79.4253		59.0507	79.4253
Mammal	Alces	alces	Moose	Tibia	MidMax	Tib_MidMax	20	28.43	53.52	41.6445	7.15962	27.3253	55.9637		27.3253	55.9637
Mammal	Alces	alces	Moose	Tibia	MidMin	Tib_MidMin	20	22.04	41.27	32.6305	5.62877	21.373	43.888		21.373	43.888
Mammal	Anas	platyrhynchos	Mallard Duck	Tibia	MaxL	Tib_MaxL	30	80	112	87.7	8.56275	70.5745	104.826		70.5745	112
Mammal	Anas	platyrhynchos	Mallard Duck	Tibia	MaxPW	Tib_MaxPW	30	10	19	12.4667	2.31537	7.83593	17.0974		7.83593	19
Mammal	Anas	platyrhynchos	Mallard Duck	Tibia	MaxDD	Tib_MaxDD	30	8	16	10.2333	1.88795	6.45743	14.0092		6.45743	16
Mammal	Anas	platyrhynchos	Mallard Duck	Tibia	MaxDW	Tib_MaxDW	30	8	15	9.73333	1.57422	6.5849	12.8818		6.5849	15
Mammal	Anas	platyrhynchos	Mallard Duck	Tibia	MidMax	Tib_MidMax	30	5	9.74	6.00933	1.0523	3.90473	8.11394		3.90473	9.74
Mammal	Anas	platyrhynchos	Mallard Duck	Tibia	MidMin	Tib_MidMin	30	3.45	6.43	4.00333	0.755022	2.49329	5.51338		2.49329	6.43
Mammal	Bos	taurus	Cow	Tibia	MaxL	Tib_MaxL	17	293	438	370.706	40.824	289.058	452.354		289.058	452.354
Mammal	Bos	taurus	Cow	Tibia	MaxPW	Tib_MaxPW	16	78	135	110.438	15.1524	80.1327	140.742		78	140.742
Mammal	Bos	taurus	Cow	Tibia	MaxDD	Tib_MaxDD	17	38	63	53.1	7.14895	38.8021	67.3979		38	67.3979
Mammal	Bos	taurus	Cow	Tibia	MaxDW	Tib_MaxDW	17	51	94	70.1706	10.1172	49.9362	90.4049		49.9362	94
Mammal	Bos	taurus	Cow	Tibia	MidMax	Tib_MidMax	12	39	64.03	49.2117	8.95417	31.3033	67.12		31.3033	67.12
Mammal	Bos	taurus	Cow	Tibia	MidMin	Tib_MidMin	12	27.74	42.43	36.7575	4.49579	27.7659	45.7491		27.74	45.7491
Mammal	Branta	canadensis	Canadian Goose	Tibia	MaxL	Tib_MaxL	30	108	168	132.967	20.0129	92.9409	172.992		92.9409	172.992
Mammal	Branta	canadensis	Canadian Goose	Tibia	MaxPW	Tib_MaxPW	30	14	25	18.7333	3.3003	12.1327	25.3339		12.1327	25.3339
Mammal	Branta	canadensis	Canadian Goose	Tibia	MaxDD	Tib_MaxDD	29	11	21	15.2759	2.76324	9.74939	20.8023		9.74939	21
Mammal	Branta	canadensis	Canadian Goose	Tibia	MaxDW	Tib_MaxDW	29	12	20	14.9655	2.55626	9.85299	20.078		9.85299	20.078
Mammal	Branta	canadensis	Canadian Goose	Tibia	MidMax	Tib_MidMax	29	6.63	12.71	8.91897	1.93614	5.04669	12.7912		5.04669	12.7912
Mammal	Branta	canadensis	Canadian Goose	Tibia	MidMin	Tib_MidMin	29	4.54	7.75	5.90655	0.992138	3.92228	7.89083		3.92228	7.89083
Mammal	Canis	familiaris	Dog	Tibia	MaxL	Tib_MaxL	147	69	292	168.842	52.1368	64.5683	273.115		64.5683	292
Mammal	Canis	familiaris	Dog	Tibia	MaxPW	Tib_MaxPW	137	15	56	33.4936	8.93094	15.6317	51.3555		15	56
Mammal	Canis	familiaris	Dog	Tibia	MaxDD	Tib_MaxDD	39	7.37	29	17.31	5.36638	6.57724	28.0428		6.57724	29
Mammal	Canis	familiaris	Dog	Tibia	MaxDW	Tib_MaxDW	74	11.98	41	22.0564	6.65303	8.7503	35.3624		8.7503	41
Mammal	Canis	familiaris	Dog	Tibia	MidMax	Tib_MidMax	39	6.9	25.66	13.9728	4.45931	5.0542	22.8914		5.0542	25.66
Mammal	Canis	familiaris	Dog	Tibia	MidMin	Tib_MidMin	38	4.86	21.67	12.9287	4.3982	4.13229	21.7251		4.13229	21.7251
Mammal	Canis	latrans	Coyote	Tibia	MaxL	Tib_MaxL	65	157	213.3	182.672	11.7204	159.231	206.113		157	213.3
Mammal	Canis	latrans	Coyote	Tibia	MaxPW	Tib_MaxPW	28	26	34	30.5618	2.26957	26.0226	35.1009		26	35.1009
Mammal	Canis	latrans	Coyote	Tibia	MaxDD	Tib_MaxDD	28	12	16	14.375	1.05957	12.2559	16.4941		12	16.4941
Mammal	Canis	latrans	Coyote	Tibia	MaxDW	Tib_MaxDW	28	17	26	21.535	2.33322	16.8686	26.2014		16.8686	26.2014
Mammal	Canis	latrans	Coyote	Tibia	MidMax	Tib_MidMax	22	10.08	19.12	13.0482	2.27585	8.49648	17.5999		8.49648	19.12
Mammal	Canis	latrans	Coyote	Tibia	MidMin	Tib_MidMin	22	9.53	15.57	11.4155	1.67943	8.05659	14.7743		8.05659	15.57
Mammal	Canis	lupus	Wolf	Tibia	MaxL	Tib_MaxL	45	189.55	287.6	229.11	23.4312	182.247	275.972		182.247	287.6
Mammal	Canis	lupus	Wolf	Tibia	MaxPW	Tib_MaxPW	28	36.48	57.05	44.0564	4.533	34.9904	53.1224		34.9904	57.05
Mammal	Canis	lupus	Wolf	Tibia	MaxDD	Tib_MaxDD	28	18	24.76	21.0375	1.85158	17.3343	24.7407		17.3343	24.76
Mammal	Canis	lupus	Wolf	Tibia	MaxDW	Tib_MaxDW	28	23.53	34.17	29.7154	2.83485	24.0457	35.3851		23.53	35.3851
Mammal	Canis	lupus	Wolf	Tibia	MidMax	Tib_MidMax	28	15.68	20.89	17.8579	1.43657	14.9847	20.731		14.9847	20.89
Mammal	Canis	lupus	Wolf	Tibia	MidMin	Tib_MidMin	28	12.53	18.29	16.2643	1.47048	13.3233	19.2052		12.53	19.2052
Mammal	Cervus	canadensis/elaphus	Elk	Tibia	MaxL	Tib_MaxL	32	370	464	422.688	23.0265	376.634	468.741		370	468.741
Mammal	Cervus	canadensis/elaphus	Elk	Tibia	MaxPW	Tib_MaxPW	32	70	103	93.4062	7.10683	79.1926	107.62		70	107.62
Mammal	Cervus	canadensis/elaphus	Elk	Tibia	MaxDD	Tib_MaxDD	32	35	53	46.25	3.95947	38.3311	54.1689		35	54.1689
Mammal	Cervus	canadensis/elaphus	Elk	Tibia	MaxDW	Tib_MaxDW	32	45	67	60.9062	4.85506	51.1961	70.6164		45	70.6164
Mammal	Cervus	canadensis/elaphus	Elk	Tibia	MidMax	Tib_MidMax	32	32.05	46.95	38.0922	3.66138	30.7694	45.415		30.7694	46.95
Mammal	Cervus	canadensis/elaphus	Elk	Tibia	MidMin	Tib_MidMin	32	25.38	37.37	31.3822	2.61504	26.1521	36.6123		25.38	37.37
Mammal	Didelphis	virginiana	Opossum	Tibia	MaxL	Tib_MaxL	33	72	95	83.4188	6.15358	71.1116	95.726		71.1116	95.726
Mammal	Didelphis	virginiana	Opossum	Tibia	MaxPW	Tib_MaxPW	32	11	20	13.545	1.62465	10.2957	16.7943		10.2957	20
Mammal	Didelphis	virginiana	Opossum	Tibia	MaxDD	Tib_MaxDD	32	5	10.21	7.8825	1.28567	5.31116	10.4538		5	10.4538
Mammal	Didelphis	virginiana	Opossum	Tibia	MaxDW	Tib_MaxDW	31	4	9.01	6.30742	0.956971	4.39348	8.22136		4	9.01
Mammal	Didelphis	virginiana	Opossum	Tibia	MidMax	Tib_MidMax	31	4.73	7.53	5.9129	0.732695	4.44751	7.37829		4.44751	7.53
Mammal	Didelphis	virginiana	Opossum	Tibia	MidMin	Tib_MidMin	31	3.22	5.06	4.01774	0.453319	3.1111	4.92438		3.1111	5.06
Mammal	Equus	ferus/caballus	Horse	Tibia	MaxL	Tib_MaxL	30	279	472	385.933	41.9646	302.004	469.863		279	472
Mammal	Equus	ferus/caballus	Horse	Tibia	MaxPW	Tib_MaxPW	30	75	144	108.533	15.4043	77.7248	139.342		75	144
Mammal	Equus	ferus/caballus	Horse	Tibia	MaxDD	Tib_MaxDD	30	35	70	51.9343	7.89044	36.1535	67.7152		35	70
Mammal	Equus	ferus/caballus	Horse	Tibia	MaxDW	Tib_MaxDW	30	18	111	80.3817	16.9426	46.4964	114.267		18	114.267
Mammal	Equus	ferus/caballus	Horse	Tibia	MidMax	Tib_MidMax	29	30.93	67.67	45.9162	7.81588	30.2844	61.548		30.2844	67.67
Mammal	Equus	ferus/caballus	Horse	Tibia	MidMin	Tib_MidMin	29	24.67	56.66	39.2779	6.5179	26.2421	52.3137		24.67	56.66
Mammal	Felis	catus	Cat	Tibia	MaxL	Tib_MaxL	39	80.69	130.61	111.184	10.6395	89.9045	132.463		80.69	132.463
Mammal	Felis	catus	Cat	Tibia	MaxPW	Tib_MaxPW	39	14.13	23.5	19.3274	2.18222	14.963	23.6919		14.13	23.6919
Mammal	Felis	catus	Cat	Tibia	MaxDD	Tib_MaxDD	33	7	12.1	9.02242	1.1495	6.72343	11.3214		6.72343	12.1
Mammal	Felis	catus	Cat	Tibia	MaxDW	Tib_MaxDW	39	10.75	20	14.2892	2.00815	10.2729	18.3055		10.2729	20
Mammal	Felis	catus	Cat	Tibia	MidMax	Tib_MidMax	28	7	9.83	8.70714	0.824881	7.05738	10.3569		7	10.3569
Mammal	Felis	catus	Cat	Tibia	MidMin	Tib_MidMin	28	6	8.77	7.22643	0.560669	6.10509	8.34777		6	8.77
Bird	Gallus	gallus	Chicken	Tibia	MaxL	Tib_MaxL	30	80	171	125	23.9353	77.1295	172.871		77.1295	172.871
Bird	Gallus	gallus	Chicken	Tibia	MaxPW	Tib_MaxPW	30	12	34	21.6667	4.73675	12.1932	31.1402		12	34
Bird	Gallus	gallus	Chicken	Tibia	MaxDD	Tib_MaxDD	30	8	18	13.9	2.69546	8.50908	19.2909		8	19.2909
Bird	Gallus	gallus	Chicken	Tibia	MaxDW	Tib_MaxDW	30	8	17	13.1333	2.31537	8.5026	17.7641		8	17.7641
Bird	Gallus	gallus	Chicken	Tibia	MidMax	Tib_MidMax	30	5.27	13.13	9.276	2.184	4.908	13.644		4.908	13.644
Bird	Gallus	gallus	Chicken	Tibia	MidMin	Tib_MidMin	30	3.82	9.24	6.867	1.49416	3.87869	9.85531		3.82	9.85531
Bird	Meleagris	gallopavo	Turkey	Tibia	MaxL	Tib_MaxL	33	135	243	207.303	24.5834	158.136	256.47		135	256.47
Bird	Meleagris	gallopavo	Turkey	Tibia	MaxPW	Tib_MaxPW	34	23	37	30.2059	3.51429	23.1773	37.2345		23	37.2345
Bird	Meleagris	gallopavo	Turkey	Tibia	MaxDD	Tib_MaxDD	35	15	24	19.4857	2.51316	14.4594	24.512		14.4594	24.512
Bird	Meleagris	gallopavo	Turkey	Tibia	MaxDW	Tib_MaxDW	35	15	23	19.8857	2.11119	15.6633	24.1081		15	24.1081
Bird	Meleagris	gallopavo	Turkey	Tibia	MidMax	Tib_MidMax	33	8.91	15	11.707	1.63955	8.42786	14.9861		8.42786	15
Bird	Meleagris	gallopavo	Turkey	Tibia	MidMin	Tib_MidMin	33	7	12	8.95364	1.1094	6.73484	11.1724		6.73484	12
Mammal	Odocoileus	hemionus	Mule Deer	Tibia	MaxL	Tib_MaxL	32	225	342	298.906	24.3461	250.214	347.598		225	347.598
Mammal	Odocoileus	hemionus	Mule Deer	Tibia	MaxPW	Tib_MaxPW	32	45	67	57.5312	4.8259	47.8794	67.1831		45	67.1831
Mammal	Odocoileus	hemionus	Mule Deer	Tibia	MaxDD	Tib_MaxDD	32	23	31	27.6875	2.03894	23.6096	31.7654		23	31.7654
Mammal	Odocoileus	hemionus	Mule Deer	Tibia	MaxDW	Tib_MaxDW	32	30	43	36.9056	3.06213	30.7814	43.0299		30	43.0299
Mammal	Odocoileus	hemionus	Mule Deer	Tibia	MidMax	Tib_MidMax	32	16.12	28.68	23.455	2.97378	17.5074	29.4026		16.12	29.4026
Mammal	Odocoileus	hemionus	Mule Deer	Tibia	MidMin	Tib_MidMin	32	13.23	22.43	18.5994	1.99051	14.6184	22.5804		13.23	22.5804
Mammal	Odocoileus	virginianus	White-Tailed Deer	Tibia	MaxL	Tib_MaxL	39	189	325	273.154	32.8574	207.439	338.869		189	338.869
Mammal	Odocoileus	virginianus	White-Tailed Deer	Tibia	MaxPW	Tib_MaxPW	37	42	61	52.7162	4.62562	43.465	61.9675		42	61.9675
Mammal	Odocoileus	virginianus	White-Tailed Deer	Tibia	MaxDD	Tib_MaxDD	38	20	31	25.59	2.97262	19.6448	31.5352		19.6448	31.5352
Mammal	Odocoileus	virginianus	White-Tailed Deer	Tibia	MaxDW	Tib_MaxDW	38	26	42	33.9	3.66156	26.5769	41.2231		26	42
Mammal	Odocoileus	virginianus	White-Tailed Deer	Tibia	MidMax	Tib_MidMax	38	17.97	25.34	21.4376	2.01409	17.4095	25.4658		17.4095	25.4658
Mammal	Odocoileus	virginianus	White-Tailed Deer	Tibia	MidMin	Tib_MidMin	38	13.03	24	17.9887	2.23613	13.5164	22.4609		13.03	24
Mammal	Ovis	aries	Sheep	Tibia	MaxL	Tib_MaxL	93	169	264.3	200.985	21.0694	158.846	243.124		158.846	264.3
Mammal	Ovis	aries	Sheep	Tibia	MaxPW	Tib_MaxPW	8	32	50	44.125	5.79254	32.5399	55.7101		32	55.7101
Mammal	Ovis	aries	Sheep	Tibia	MaxDD	Tib_MaxDD	34	17.4	25	20.1235	1.82658	16.4704	23.7767		16.4704	25
Mammal	Ovis	aries	Sheep	Tibia	MaxDW	Tib_MaxDW	104	20.6	39	27.1423	3.84111	19.4601	34.8245		19.4601	39
Mammal	Ovis	aries	Sheep	Tibia	MidMax	Tib_MidMax	8	10.03	19.22	16.1	2.84994	10.4001	21.7999		10.03	21.7999
Mammal	Ovis	aries	Sheep	Tibia	MidMin	Tib_MidMin	8	8.74	15.1	13.3825	2.04526	9.29198	17.473		8.74	17.473
Mammal	Capra	hircus	Goat	Tibia	MaxL	Tib_MaxL	61	188.7	274.2	230.033	18.6402	192.752	267.313		188.7	274.2
Mammal	Capra	hircus	Goat	Tibia	MaxPW	Tib_MaxPW	3	41	49.5	44.8333	4.31084	36.2117	53.455		36.2117	53.455
Mammal	Capra	hircus	Goat	Tibia	MaxDD	Tib_MaxDD	3	19	24.6	21.2	2.98664	15.2267	27.1733		15.2267	27.1733
Mammal	Capra	hircus	Goat	Tibia	MaxDW	Tib_MaxDW	80	22.4	34.9	27.9809	2.64859	22.6837	33.2781		22.4	34.9
Mammal	Capra	hircus	Goat	Tibia	MidMax	Tib_MidMax	3	15.97	20.8	18.05	2.48373	13.0825	23.0175		13.0825	23.0175
Mammal	Capra	hircus	Goat	Tibia	MidMin	Tib_MidMin	3	13	16.8	14.6533	1.94744	10.7584	18.5482		10.7584	18.5482
Mammal	Ovis/Capra	aries/aegagrus	Sheep/Goat	Tibia	MaxL	Tib_MaxL	154	169	274.2	212.491	24.6241	163.243	261.739		163.243	274.2
Mammal	Ovis/Capra	aries/aegagrus	Sheep/Goat	Tibia	MaxPW	Tib_MaxPW	11	32	50	44.3182	5.22624	33.8657	54.7707		32	54.7707
Mammal	Ovis/Capra	aries/aegagrus	Sheep/Goat	Tibia	MaxDD	Tib_MaxDD	37	17.4	25	20.2108	1.90857	16.3937	24.028		16.3937	25
Mammal	Ovis/Capra	aries/aegagrus	Sheep/Goat	Tibia	MaxDW	Tib_MaxDW	184	20.6	39	27.5069	3.3921	20.7227	34.2911		20.6	39
Mammal	Ovis/Capra	aries/aegagrus	Sheep/Goat	Tibia	MidMax	Tib_MidMax	11	10.03	20.8	16.6318	2.78369	11.0644	22.1992		10.03	22.1992
Mammal	Ovis/Capra	aries/aegagrus	Sheep/Goat	Tibia	MidMin	Tib_MidMin	11	8.74	16.8	13.7291	2.00973	9.70962	17.7486		8.74	17.7486
Mammal	Procyon	lotor	Raccoon	Tibia	MaxL	Tib_MaxL	39	91	140	118.895	9.98123	98.9327	138.858		91	140
Mammal	Procyon	lotor	Raccoon	Tibia	MaxPW	Tib_MaxPW	33	19	28	23.1515	2.04819	19.0551	27.2479		19	28
Mammal	Procyon	lotor	Raccoon	Tibia	MaxDD	Tib_MaxDD	33	9	14	11.2242	1.34978	8.52469	13.9238		8.52469	14
Mammal	Procyon	lotor	Raccoon	Tibia	MaxDW	Tib_MaxDW	33	12	19	15.3152	1.41953	12.4761	18.1542		12	19
Mammal	Procyon	lotor	Raccoon	Tibia	MidMax	Tib_MidMax	29	6.46	11	8.16034	1.09328	5.97379	10.3469		5.97379	11
Mammal	Procyon	lotor	Raccoon	Tibia	MidMin	Tib_MidMin	29	5.78	9	6.83069	0.687069	5.45655	8.20483		5.45655	9
Mammal	Sus	scrofa	Pig	Tibia	MaxL	Tib_MaxL	17	131	257	180.353	33.2038	113.945	246.761		113.945	257
Mammal	Sus	scrofa	Pig	Tibia	MaxPW	Tib_MaxPW	7	36	75.5	54.0714	11.6563	30.7589	77.384		30.7589	77.384
Mammal	Sus	scrofa	Pig	Tibia	MaxDD	Tib_MaxDD	7	21	38.5	28.9286	5.23154	18.4655	39.3917		18.4655	39.3917
Mammal	Sus	scrofa	Pig	Tibia	MaxDW	Tib_MaxDW	7	27	40	33.3571	4.02817	25.3008	41.4135		25.3008	41.4135
Mammal	Sus	scrofa	Pig	Tibia	MidMax	Tib_MidMax	7	16.35	37.48	26.0829	7.24096	11.6009	40.5648		11.6009	40.5648
Mammal	Sus	scrofa	Pig	Tibia	MidMin	Tib_MidMin	7	13.21	27.32	20.7986	4.74466	11.3092	30.2879		11.3092	30.2879
Mammal	Sylvilagus	floridanus	Eastern Cotton-Tail	Tibia	MaxL	Tib_MaxL	25	79	98	90.9976	4.36732	82.263	99.7322		79	99.7322
Mammal	Sylvilagus	floridanus	Eastern Cotton-Tail	Tibia	MaxPW	Tib_MaxPW	31	12	15	13.2903	0.69251	11.9053	14.6753		11.9053	15
Mammal	Sylvilagus	floridanus	Eastern Cotton-Tail	Tibia	MaxDD	Tib_MaxDD	25	5	6.83	5.8288	0.515415	4.79797	6.85963		4.79797	6.85963
Mammal	Sylvilagus	floridanus	Eastern Cotton-Tail	Tibia	MaxDW	Tib_MaxDW	25	6	11.35	10.1304	1.11055	7.90929	12.3515		6	12.3515
Mammal	Sylvilagus	floridanus	Eastern Cotton-Tail	Tibia	MidMax	Tib_MidMax	25	5.37	8	6.3008	0.556387	5.18803	7.41357		5.18803	8
Mammal	Sylvilagus	floridanus	Eastern Cotton-Tail	Tibia	MidMin	Tib_MidMin	25	4.33	6.59	5.2644	0.663344	3.93771	6.59109		3.93771	6.59109
Mammal	Urocyon	cinereoargenteus	Grey Fox	Tibia	MaxL	Tib_MaxL	39	98	128	119.091	5.82022	107.45	130.731		98	130.731
Mammal	Urocyon	cinereoargenteus	Grey Fox	Tibia	MaxPW	Tib_MaxPW	32	18	25	21.9688	1.51305	18.9427	24.9948		18	25
Mammal	Urocyon	cinereoargenteus	Grey Fox	Tibia	MaxDD	Tib_MaxDD	32	8	11	8.84375	0.723316	7.39712	10.2904		7.39712	11
Mammal	Urocyon	cinereoargenteus	Grey Fox	Tibia	MaxDW	Tib_MaxDW	32	12	19	15.5625	1.84806	11.8664	19.2586		11.8664	19.2586
Mammal	Urocyon	cinereoargenteus	Grey Fox	Tibia	MidMax	Tib_MidMax	32	7.51	15	10.3547	1.79329	6.7681	13.9413		6.7681	15
Mammal	Urocyon	cinereoargenteus	Grey Fox	Tibia	MidMin	Tib_MidMin	32	6.87	12.48	9.48187	1.6198	6.24228	12.7215		6.24228	12.7215
Mammal	Ursus	americanus	Black Bear	Tibia	MaxL	Tib_MaxL	19	227.02	274.7	250.601	14.5842	221.433	279.769		221.433	279.769
Mammal	Ursus	americanus	Black Bear	Tibia	MaxPW	Tib_MaxPW	12	61	75	67.1667	3.9734	59.2199	75.1135		59.2199	75.1135
Mammal	Ursus	americanus	Black Bear	Tibia	MaxDD	Tib_MaxDD	13	24	31	27.8462	2.37508	23.096	32.5963		23.096	32.5963
Mammal	Ursus	americanus	Black Bear	Tibia	MaxDW	Tib_MaxDW	13	39	54	45.7692	4.0032	37.7628	53.7756		37.7628	54
Mammal	Ursus	americanus	Black Bear	Tibia	MidMax	Tib_MidMax	13	23.38	31	27.0115	2.39689	22.2178	31.8053		22.2178	31.8053
Mammal	Ursus	americanus	Black Bear	Tibia	MidMin	Tib_MidMin	13	17.24	23.39	20.5069	1.93373	16.6395	24.3744		16.6395	24.3744
Mammal	Ursus	arctos	Brown Bear	Tibia	MaxL	Tib_MaxL	22	250	349	291.635	25.853	239.929	343.342		239.929	349
Mammal	Ursus	arctos	Brown Bear	Tibia	MaxPW	Tib_MaxPW	16	69	102	81.625	8.79299	64.039	99.211		64.039	102
Mammal	Ursus	arctos	Brown Bear	Tibia	MaxDD	Tib_MaxDD	16	30	50	38.375	5.08429	28.2064	48.5436		28.2064	50
Mammal	Ursus	arctos	Brown Bear	Tibia	MaxDW	Tib_MaxDW	16	55	73	61.1088	5.67144	49.7659	72.4516		49.7659	73
Mammal	Ursus	arctos	Brown Bear	Tibia	MidMax	Tib_MidMax	16	27.96	45.18	33.2375	4.54443	24.1486	42.3264		24.1486	45.18
Mammal	Ursus	arctos	Brown Bear	Tibia	MidMin	Tib_MidMin	16	20.12	32.47	24.3356	3.65601	17.0236	31.6476		17.0236	32.47
Mammal	Vulpes	vulpes	Red Fox	Tibia	MaxL	Tib_MaxL	41	112	165	142.737	9.74599	123.245	162.229		112	165
Mammal	Vulpes	vulpes	Red Fox	Tibia	MaxPW	Tib_MaxPW	37	19	28	22.5135	1.7098	19.0939	25.9331		19	28
Mammal	Vulpes	vulpes	Red Fox	Tibia	MaxDD	Tib_MaxDD	37	8	12	9.97108	0.828217	8.31465	11.6275		8	12
Mammal	Vulpes	vulpes	Red Fox	Tibia	MaxDW	Tib_MaxDW	37	13	21	16.8927	1.95572	12.9813	20.8042		12.9813	21
Mammal	Vulpes	vulpes	Red Fox	Tibia	MidMax	Tib_MidMax	36	7.5	12.39	10.1244	1.41725	7.28995	12.9589		7.28995	12.9589
Mammal	Vulpes	vulpes	Red Fox	Tibia	MidMin	Tib_MidMin	36	6.89	11.62	8.87639	1.3636	6.14918	11.6036		6.14918	11.62
Bird	Aquila	chrysaetos	Golden Eagle	Tibia	MaxL	Tib_MaxL	19	158	177	167.474	5.37865	156.716	178.231		156.716	178.231
Bird	Aquila	chrysaetos	Golden Eagle	Tibia	MaxPW	Tib_MaxPW	19	23	31	27.5263	2.06474	23.3968	31.6558		23	31.6558
Bird	Aquila	chrysaetos	Golden Eagle	Tibia	MaxDD	Tib_MaxDD	19	13	20	15.4211	1.95266	11.5157	19.3264		11.5157	20
Bird	Aquila	chrysaetos	Golden Eagle	Tibia	MaxDW	Tib_MaxDW	19	20	27	22.7368	1.96757	18.8017	26.672		18.8017	27
Bird	Aquila	chrysaetos	Golden Eagle	Tibia	MidMax	Tib_MidMax	19	10.23	16.83	14.4005	1.80703	10.7865	18.0146		10.23	18.0146
Bird	Aquila	chrysaetos	Golden Eagle	Tibia	MidMin	Tib_MidMin	19	7.95	10.49	9.05474	0.654203	7.74633	10.3631		7.74633	10.49
Turtle	Terrapene	carolina	Common Box Turtle	Tibia	MaxL	Tib_MaxL	31	15	34	24.0842	4.06825	15.9477	32.2207		15	34
Turtle	Terrapene	carolina	Common Box Turtle	Tibia	MaxPW	Tib_MaxPW	31	3.8	7	5.29774	0.788736	3.72027	6.87521		3.72027	7
Turtle	Terrapene	carolina	Common Box Turtle	Tibia	MaxDD	Tib_MaxDD	31	2.26	5.72	3.99258	0.866148	2.26028	5.72488		2.26	5.72488
Turtle	Terrapene	carolina	Common Box Turtle	Tibia	MaxDW	Tib_MaxDW	31	2.73	5.21	3.75032	0.707557	2.33521	5.16544		2.33521	5.21
Turtle	Terrapene	carolina	Common Box Turtle	Tibia	MidMax	Tib_MidMax	31	2.04	4.31	2.89871	0.605314	1.68808	4.10934		1.68808	4.31
Turtle	Terrapene	carolina	Common Box Turtle	Tibia	MidMin	Tib_MidMin	31	1.33	3.44	1.85032	0.410516	1.02929	2.67135		1.02929	3.44
Turtle	Chelydra	serpentina	Common Snapping Turtle	Tibia	MaxL	Tib_MaxL	30	15.57	65	39.9363	11.0102	17.9159	61.9568		15.57	65
Turtle	Chelydra	serpentina	Common Snapping Turtle	Tibia	MaxPW	Tib_MaxPW	30	4.97	22	13.2777	4.0147	5.24826	21.3071		4.97	22
Turtle	Chelydra	serpentina	Common Snapping Turtle	Tibia	MaxDD	Tib_MaxDD	30	2.87	10	5.70967	1.49921	2.71125	8.70808		2.71125	10
Turtle	Chelydra	serpentina	Common Snapping Turtle	Tibia	MaxDW	Tib_MaxDW	30	3.26	15	8.70633	2.65058	3.40517	14.0075		3.26	15
Turtle	Chelydra	serpentina	Common Snapping Turtle	Tibia	MidMax	Tib_MidMax	30	1.88	8.57	5.18233	1.45873	2.26487	8.0998		1.88	8.57
Turtle	Chelydra	serpentina	Common Snapping Turtle	Tibia	MidMin	Tib_MidMin	30	1.41	5.41	3.66667	0.958761	1.74914	5.58419		1.41	5.58419
Mammal	Homo	sapiens	Human	Tibia	MaxL	Tib_MaxL	2589	158.5	472	357.363	31.8723	293.618	421.108		158.5	472
Mammal	Homo	sapiens	Human	Tibia	MaxPW	Tib_MaxPW	1867	50	94	70.8328	6.48719	57.8584	83.8071		50	94
Mammal	Homo	sapiens	Human	Tibia	MaxDD	Tib_MaxDD	82	30	52	39.0366	4.16169	30.7132	47.36		30	52
Mammal	Homo	sapiens	Human	Tibia	MaxDW	Tib_MaxDW	415	40	62.5	51.5482	4.31823	42.9117	60.1847		40	62.5
Mammal	Homo	sapiens	Human	Tibia	MidMax	Tib_MidMax	420	19.11	44	33.2032	4.34551	24.5122	41.8942		19.11	44
Mammal	Homo	sapiens	Human	Tibia	MidMin	Tib_MidMin	82	15.09	28.11	20.7177	2.56634	15.585	25.8504		15.09	28.11

## Sheet: TableS7_Fibula
Table S7. Descriptive statistics for fibular measurements collected by species.
Class	Genus	Species	Common_Name	Bone	Measurement	Variable	Count	Min	Max	Ave	SD	SD2-	SD2+		Web_Min	Web_Max
Mammal	Alces	alces	Moose	Fibula	MaxL	Fib_MaxL
Mammal	Anas	platyrhynchos	Mallard Duck	Fibula	MaxL	Fib_MaxL
Mammal	Bos	taurus	Cow	Fibula	MaxL	Fib_MaxL
Mammal	Branta	canadensis	Canadian Goose	Fibula	MaxL	Fib_MaxL
Mammal	Canis	familiaris	Dog	Fibula	MaxL	Fib_MaxL	54	54	252.1	144.531	43.0796	58.3722	230.691		54	252.1
Mammal	Canis	latrans	Coyote	Fibula	MaxL	Fib_MaxL	16	134	194.09	169.957	15.1287	139.7	200.215		134	200.215
Mammal	Canis	lupus	Wolf	Fibula	MaxL	Fib_MaxL	17	188.43	251.23	213.232	19.0383	175.155	251.308		175.155	251.308
Mammal	Cervus	canadensis/elaphus	Elk	Fibula	MaxL	Fib_MaxL
Mammal	Didelphis	virginiana	Opossum	Fibula	MaxL	Fib_MaxL	30	67	91	79.4103	6.44322	66.5239	92.2968		66.5239	92.2968
Mammal	Equus	ferus/caballus	Horse	Fibula	MaxL	Fib_MaxL
Mammal	Felis	catus	Cat	Fibula	MaxL	Fib_MaxL	32	60.53	129.05	103.031	12.6996	77.632	128.43		60.53	129.05
Bird	Gallus	gallus	Chicken	Fibula	MaxL	Fib_MaxL	3	77	85	82	4.3589	73.2822	90.7178		73.2822	90.7178
Bird	Meleagris	gallopavo	Turkey	Fibula	MaxL	Fib_MaxL
Mammal	Odocoileus	hemionus	Mule Deer	Fibula	MaxL	Fib_MaxL
Mammal	Odocoileus	virginianus	White-Tailed Deer	Fibula	MaxL	Fib_MaxL
Mammal	Ovis	aries	Sheep	Fibula	MaxL	Fib_MaxL
Mammal	Capra	hircus	Goat	Fibula	MaxL	Fib_MaxL
Mammal	Ovis/Capra	aries/aegagrus	Sheep/Goat	Fibula	MaxL	Fib_MaxL
Mammal	Procyon	lotor	Raccoon	Fibula	MaxL	Fib_MaxL	33	98	131	113.563	8.24191	97.0795	130.047		97.0795	131
Mammal	Sus	scrofa	Pig	Fibula	MaxL	Fib_MaxL	6	114	246.5	186.75	43.3933	99.9635	273.537		99.9635	273.537
Mammal	Sylvilagus	floridanus	Eastern Cotton-Tail	Fibula	MaxL	Fib_MaxL
Mammal	Urocyon	cinereoargenteus	Grey Fox	Fibula	MaxL	Fib_MaxL	15	104.52	117	112.238	3.78248	104.673	119.803		104.52	119.803
Mammal	Ursus	americanus	Black Bear	Fibula	MaxL	Fib_MaxL	14	179	244	221.485	18.3752	184.735	258.235		179	258.235
Mammal	Ursus	arctos	Brown Bear	Fibula	MaxL	Fib_MaxL	17	205	324	266.974	27.1241	212.726	321.222		205	324
Mammal	Vulpes	vulpes	Red Fox	Fibula	MaxL	Fib_MaxL	10	122	142.84	135.756	6.31124	123.134	148.378		122	148.378
Bird	Aquila	chrysaetos	Golden Eagle	Fibula	MaxL	Fib_MaxL
Turtle	Terrapene	carolina	Common Box Turtle	Fibula	MaxL	Fib_MaxL	29	14	34	23.9597	4.00269	15.9543	31.965		14	34
Turtle	Chelydra	serpentina	Common Snapping Turtle	Fibula	MaxL	Fib_MaxL	30	16.31	65	39.178	10.9631	17.2518	61.1042		16.31	65
Mammal	Homo	sapiens	Human	Fibula	MaxL	Fib_MaxL	429	282	462.5	366.259	27.3245	311.61	420.908		282	462.5

## Sheet: TableS8_Scap
Table S8. Descriptive statistics for scapular measurements collected by species.
Class	Genus	Species	Common_Name	Bone	Measurement	Variable	Count	Min	Max	Ave	SD	SD2-	SD2+		Web_Min	Web_Max
Mammal	Alces	alces	Moose	Scapula	MaxL	Scap_MaxL	20	249	470	384.35	65.3994	253.551	515.149		249	515.149
Mammal	Anas	platyrhynchos	Mallard Duck	Scapula	MaxL	Scap_MaxL	30	67	96	76.9	7.00419	62.8916	90.9084		62.8916	96
Mammal	Bos	taurus	Cow	Scapula	MaxL	Scap_MaxL	8	350	492	428	55.4102	317.18	538.82		317.18	538.82
Mammal	Branta	canadensis	Canadian Goose	Scapula	MaxL	Scap_MaxL	31	72	115	88.3226	13.093	62.1366	114.509		62.1366	115
Mammal	Canis	familiaris	Dog	Scapula	MaxL	Scap_MaxL	64	50	211	133.795	39.4375	54.9203	212.67		50	212.67
Mammal	Canis	latrans	Coyote	Scapula	MaxL	Scap_MaxL	32	92.15	190	118.549	19.6157	79.3174	157.78		79.3174	190
Mammal	Canis	lupus	Wolf	Scapula	MaxL	Scap_MaxL	38	127.08	191.85	160.349	16.1008	128.148	192.551		127.08	192.551
Mammal	Cervus	canadensis/elaphus	Elk	Scapula	MaxL	Scap_MaxL	32	290	380	344.562	23.4864	297.59	391.535		290	391.535
Mammal	Didelphis	virginiana	Opossum	Scapula	MaxL	Scap_MaxL	36	52	76	63.7411	6.26822	51.2047	76.2775		51.2047	76.2775
Mammal	Equus	ferus/caballus	Horse	Scapula	MaxL	Scap_MaxL	31	266	523	393.29	51.0341	291.222	495.359		266	523
Mammal	Felis	catus	Cat	Scapula	MaxL	Scap_MaxL	41	49.01	87.49	72.031	7.89231	56.2463	87.8156		49.01	87.8156
Bird	Gallus	gallus	Chicken	Scapula	MaxL	Scap_MaxL	31	51	104.37	76.2981	11.997	52.304	100.292		51	104.37
Bird	Meleagris	gallopavo	Turkey	Scapula	MaxL	Scap_MaxL	35	89	136	119.457	10.4975	98.4622	140.452		89	140.452
Mammal	Odocoileus	hemionus	Mule Deer	Scapula	MaxL	Scap_MaxL	30	158	244	200.267	23.2066	153.853	246.68		153.853	246.68
Mammal	Odocoileus	virginianus	White-Tailed Deer	Scapula	MaxL	Scap_MaxL	38	146	225	181.105	19.5942	141.917	220.294		141.917	225
Mammal	Ovis	aries	Sheep	Scapula	MaxL	Scap_MaxL	7	112	185	153.143	27.5888	97.9652	208.32		97.9652	208.32
Mammal	Capra	hircus	Goat	Scapula	MaxL	Scap_MaxL	4	137	179	157.25	17.2119	122.826	191.674		122.826	191.674
Mammal	Ovis/Capra	aries/aegagrus	Sheep/Goat	Scapula	MaxL	Scap_MaxL	12	112	185	154.083	22.4396	109.204	198.963		109.204	198.963
Mammal	Procyon	lotor	Raccoon	Scapula	MaxL	Scap_MaxL	37	50	86	71.0308	7.18936	56.6521	85.4095		50	86
Mammal	Sus	scrofa	Pig	Scapula	MaxL	Scap_MaxL	9	144	288	224.111	40.9739	142.163	306.059		142.163	306.059
Mammal	Sylvilagus	floridanus	Eastern Cotton-Tail	Scapula	MaxL	Scap_MaxL	32	48	62	56.1562	3.47442	49.2074	63.1051		48	63.1051
Mammal	Urocyon	cinereoargenteus	Grey Fox	Scapula	MaxL	Scap_MaxL	37	55.46	80	70.9038	6.74061	57.4226	84.385		55.46	84.385
Mammal	Ursus	americanus	Black Bear	Scapula	MaxL	Scap_MaxL	19	178	238	200.183	16.0234	168.136	232.23		168.136	238
Mammal	Ursus	arctos	Brown Bear	Scapula	MaxL	Scap_MaxL	20	179.3	346	249.053	44.4397	160.174	337.933		160.174	346
Mammal	Vulpes	vulpes	Red Fox	Scapula	MaxL	Scap_MaxL	44	67	96	80.2298	5.33039	69.569	90.8906		67	96
Bird	Aquila	chrysaetos	Golden Eagle	Scapula	MaxL	Scap_MaxL	23	90	109	95.913	4.05545	87.8022	104.024		87.8022	109
Turtle	Terrapene	carolina	Common Box Turtle	Scapula	MaxL	Scap_MaxL	30	17	39	31.6043	3.9537	23.6969	39.5117		17	39.5117
Turtle	Chelydra	serpentina	Common Snapping Turtle	Scapula	MaxL	Scap_MaxL	29	30	109	67.0262	16.9461	33.134	100.918		30	109
Mammal	Homo	sapiens	Human	Scapula	MaxL	Scap_MaxL	92	127	210	178.467	16.5632	145.341	211.594		127	211.594

## Sheet: TableS9_Sacrum
Table S9. Descriptive statistics for sacral measurements collected by species.
Class	Genus	Species	Common_Name	Bone	Measurement	Variable	Count	Min	Max	Ave	SD	SD2-	SD2+		Web_Min	Web_Max
Mammal	Alces	alces	Moose	Sacrum	MaxL	Sac_MaxL	15	147	342	212.8	46.654	119.492	306.108		119.492	342
Mammal	Alces	alces	Moose	Sacrum	MaxB	Sac_MaxPW	15	117	215	170.857	26.8298	117.198	224.517
Mammal	Anas	platyrhynchos	Mallard Duck	Sacrum	MaxL	Sac_MaxL	30	70	102	80	8.19167	63.6167	96.3833		63.6167	102
Mammal	Anas	platyrhynchos	Mallard Duck	Sacrum	MaxB	Sac_MaxPW	30	17.82	25.28	21.0357	1.61888	17.7979	24.2734		17.7979	25.28
Mammal	Bos	taurus	Cow	Sacrum	MaxL	Sac_MaxL	9	195	375	273.556	52.669	168.217	378.894		168.217	378.894
Mammal	Bos	taurus	Cow	Sacrum	MaxB	Sac_MaxPW	9	125	292	215.778	51.8478	112.082	319.473		112.082	319.473
Mammal	Branta	canadensis	Canadian Goose	Sacrum	MaxL	Sac_MaxL	30	86	158	116.8	22.7632	71.2735	162.326		71.2735	162.326
Mammal	Branta	canadensis	Canadian Goose	Sacrum	MaxB	Sac_MaxPW	30	20.96	37.2	26.99	4.77537	17.4393	36.5407		17.4393	37.2
Mammal	Canis	familiaris	Dog	Sacrum	MaxL	Sac_MaxL	58	9.2	76.58	39.0181	15.758	7.50213	70.5341		7.50213	76.58
Mammal	Canis	familiaris	Dog	Sacrum	MaxB	Sac_MaxPW	58	13.7	85.37	37.031	18.0556	0.919861	73.1422		0.919861	85.37
Mammal	Canis	latrans	Coyote	Sacrum	MaxL	Sac_MaxL	22	33	50	41.3141	4.80102	31.7121	50.9161		31.7121	50.9161
Mammal	Canis	latrans	Coyote	Sacrum	MaxB	Sac_MaxPW	25	31.21	45	39.2496	3.9323	31.385	47.1142		31.21	47.1142
Mammal	Canis	lupus	Wolf	Sacrum	MaxL	Sac_MaxL	27	44.76	68.41	52.9337	6.45748	40.0187	65.8487		40.0187	68.41
Mammal	Canis	lupus	Wolf	Sacrum	MaxB	Sac_MaxPW	27	44.08	59	52.6259	4.0742	44.4775	60.7743		44.08	60.7743
Mammal	Cervus	canadensis/elaphus	Elk	Sacrum	MaxL	Sac_MaxL	31	161	237	205.065	20.5295	164.005	246.124		161	246.124
Mammal	Cervus	canadensis/elaphus	Elk	Sacrum	MaxB	Sac_MaxPW	30	135	192	167.7	13.0679	141.564	193.836		135	193.836
Mammal	Didelphis	virginiana	Opossum	Sacrum	MaxL	Sac_MaxL	26	21	35.04	27.0977	3.15019	20.7973	33.3981		20.7973	35.04
Mammal	Didelphis	virginiana	Opossum	Sacrum	MaxB	Sac_MaxPW	26	19.84	29	24.6108	2.39249	19.8258	29.3957		19.8258	29.3957
Mammal	Equus	ferus/caballus	Horse	Sacrum	MaxL	Sac_MaxL	29	179	311	246.414	30.8967	184.62	308.207		179	311
Mammal	Equus	ferus/caballus	Horse	Sacrum	MaxB	Sac_MaxPW	29	134	290	220.448	34.7497	150.949	289.948		134	290
Mammal	Felis	catus	Cat	Sacrum	MaxL	Sac_MaxL	30	22	36	30.5943	3.28914	24.0161	37.1726		22	37.1726
Mammal	Felis	catus	Cat	Sacrum	MaxB	Sac_MaxPW	31	25	35	29.0745	2.27657	24.5214	33.6277		24.5214	35
Bird	Gallus	gallus	Chicken	Sacrum	MaxL	Sac_MaxL	30	48.97	104.51	79.5053	12.6175	54.2704	104.74		48.97	104.74
Bird	Gallus	gallus	Chicken	Sacrum	MaxB	Sac_MaxPW	30	17.7	31.22	24.9847	3.46987	18.0449	31.9244		17.7	31.9244
Bird	Meleagris	gallopavo	Turkey	Sacrum	MaxL	Sac_MaxL	29	120	174	140.828	14.6922	111.443	170.212		111.443	174
Bird	Meleagris	gallopavo	Turkey	Sacrum	MaxB	Sac_MaxPW	29	25.84	42.79	35.3893	4.44333	26.5027	44.276
Mammal	Odocoileus	hemionus	Mule Deer	Sacrum	MaxL	Sac_MaxL	29	67.15	168	130.111	18.3891	93.3331	166.89		67.15	168
Mammal	Odocoileus	hemionus	Mule Deer	Sacrum	MaxB	Sac_MaxPW	29	56.01	109	91.11	10.1358	70.8385	111.382		56.01	111.382
Mammal	Odocoileus	virginianus	White-Tailed Deer	Sacrum	MaxL	Sac_MaxL	30	83	150	115.667	13.6794	88.3078	143.025		83	150
Mammal	Odocoileus	virginianus	White-Tailed Deer	Sacrum	MaxB	Sac_MaxPW	30	68	98	83.239	9.19363	64.8517	101.626		64.8517	101.626
Mammal	Ovis	aries	Sheep	Sacrum	MaxL	Sac_MaxL	7	51.23	122	91.89	23.3313	45.2273	138.553		45.2273	138.553
Mammal	Ovis	aries	Sheep	Sacrum	MaxB	Sac_MaxPW	7	46.45	90	76.2071	14.5138	47.1795	105.235		46.45	105.235
Mammal	Capra	hircus	Goat	Sacrum	MaxL	Sac_MaxL	3	68	123	99.6667	28.4312	42.8043	156.529		42.8043	156.529
Mammal	Capra	hircus	Goat	Sacrum	MaxB	Sac_MaxPW	3	62	82	72.3333	10.0167	52.3	92.3666		52.3	92.3666
Mammal	Ovis/Capra	aries/aegagrus	Sheep/Goat	Sacrum	MaxL	Sac_MaxL	11	51.23	123	94.8391	22.4756	49.8879	139.79		49.8879	139.79
Mammal	Ovis/Capra	aries/aegagrus	Sheep/Goat	Sacrum	MaxB	Sac_MaxPW	11	46.45	92	76.5864	13.2568	50.0728	103.1		46.45	103.1
Mammal	Procyon	lotor	Raccoon	Sacrum	MaxL	Sac_MaxL	26	27.79	45	37.0731	4.21909	28.6349	45.5113		27.79	45.5113
Mammal	Procyon	lotor	Raccoon	Sacrum	MaxB	Sac_MaxPW	26	23	42	32.7246	4.46053	23.8036	41.6457		23	42
Mammal	Sus	scrofa	Pig	Sacrum	MaxL	Sac_MaxL	6	68	215	144.833	49.7531	45.3272	244.339		45.3272	244.339
Mammal	Sus	scrofa	Pig	Sacrum	MaxB	Sac_MaxPW	6	73	130.5	97.25	19.8891	57.4719	137.028		57.4719	137.028
Mammal	Sylvilagus	floridanus	Eastern Cotton-Tail	Sacrum	MaxL	Sac_MaxL	28	28	42	35.1546	3.93764	27.2794	43.0299		27.2794	43.0299
Mammal	Sylvilagus	floridanus	Eastern Cotton-Tail	Sacrum	MaxB	Sac_MaxPW	29	19	26.34	22.331	1.78663	18.7578	25.9043		18.7578	26.34
Mammal	Urocyon	cinereoargenteus	Grey Fox	Sacrum	MaxL	Sac_MaxL	28	19.86	30.21	26.5475	2.80818	20.9311	32.1639		19.86	32.1639
Mammal	Urocyon	cinereoargenteus	Grey Fox	Sacrum	MaxB	Sac_MaxPW	29	20.59	31.56	27.8524	2.30606	23.2403	32.4645		20.59	32.4645
Mammal	Ursus	americanus	Black Bear	Sacrum	MaxL	Sac_MaxL	10	114.09	167	135.607	15.2192	105.169	166.045		105.169	167
Mammal	Ursus	americanus	Black Bear	Sacrum	MaxB	Sac_MaxPW	10	82.88	108.78	96.82	8.0768	80.6664	112.974		80.6664	112.974
Mammal	Ursus	arctos	Brown Bear	Sacrum	MaxL	Sac_MaxL	12	113	250	180.083	34.7051	110.673	249.494		110.673	250
Mammal	Ursus	arctos	Brown Bear	Sacrum	MaxB	Sac_MaxPW	12	94	230	124.75	35.0898	54.5704	194.93		54.5704	230
Mammal	Vulpes	vulpes	Red Fox	Sacrum	MaxL	Sac_MaxL	29	18	42	28.7338	4.11664	20.5005	36.9671		18	42
Mammal	Vulpes	vulpes	Red Fox	Sacrum	MaxB	Sac_MaxPW	31	25	33	28.8968	1.92576	25.0452	32.7483		25	33
Bird	Aquila	chrysaetos	Golden Eagle	Sacrum	MaxL	Sac_MaxL	23	82	103	94.5217	5.92276	82.6762	106.367		82	106.367
Bird	Aquila	chrysaetos	Golden Eagle	Sacrum	MaxB	Sac_MaxPW	23	22.2	33.44	28.4957	2.49958	23.4965	33.4948		22.2	33.4948
Turtle	Terrapene	carolina	Common Box Turtle	Sacrum	MaxL	Sac_MaxL
Turtle	Terrapene	carolina	Common Box Turtle	Sacrum	MaxB	Sac_MaxPW
Turtle	Chelydra	serpentina	Common Snapping Turtle	Sacrum	MaxL	Sac_MaxL
Turtle	Chelydra	serpentina	Common Snapping Turtle	Sacrum	MaxB	Sac_MaxPW
Mammal	Homo	sapiens	Human	Sacrum	MaxL	Sac_MaxL	90	89	157	114.422	13.4473	87.5275	141.317		87.5275	157
Mammal	Homo	sapiens	Human	Sacrum	MaxB	Sac_MaxPW	90	90	138	111.167	9.08542	92.9958	129.338		90	138

[truncated: 2 more sheets: TableS10_OsCoxae, Table S11_MetaPodials]
